# Supplementary material
Source: PubMed Central journal article supplement (PMC3383042)
Supplement: NIHMS333897-supplement-01.pdf [file NIHMS333897-supplement-01.pdf]

# Supplementary Information

## In Search of a Cytostatic Agent Derived from the Alkaloid Lycorine: Synthesis and Growth Inhibitory Properties of Lycorine Derivatives<sup>†</sup>

Nikolai M. Evdokimov,<sup>a,#</sup> Delphine Lamoral-Theys,<sup>b,#</sup> Véronique Mathieu,<sup>c</sup>

Anna Andolfi,<sup>d</sup> Stephen C. Pelly,<sup>e</sup> Willem A. L. van Otterlo,<sup>e</sup> Igor V. Magedov,<sup>a</sup>

Robert Kiss,<sup>c</sup> Antonio Evidente,<sup>d</sup> and Alexander Kornienko<sup>\*a</sup>

<sup>a</sup>*Department of Chemistry, New Mexico Institute of Mining and Technology, Socorro, New Mexico 87801.*

<sup>b</sup>*Laboratoire de Chimie Analytique, Toxicologie et Chimie Physique Appliquée and <sup>c</sup>Laboratoire de Toxicologie, Faculté de Pharmacie, Université Libre de Bruxelles, Brussels, Belgium.*

<sup>d</sup>*Dipartimento di Scienze, del Suolo, della Pianta, dell'Ambiente e delle Produzioni Animali, Università di Napoli Federico II, Via Università 100, 80055 Portici, Italy.*

<sup>e</sup>*Department of Chemistry and Polymer Sciences, Stellenbosch University, Stellenbosch, Western Cape, South Africa.*

<sup>#</sup>*These two authors provided equal contributions.*

<sup>\*</sup>*To whom correspondence should be addressed. Fax: +1 575 835 5364; Tel.: +1 575 835 5884;*

*akornien@nmt.edu*

### Table of Contents

<sup>1</sup>H and <sup>13</sup>C NMR Spectra

S2 – S37

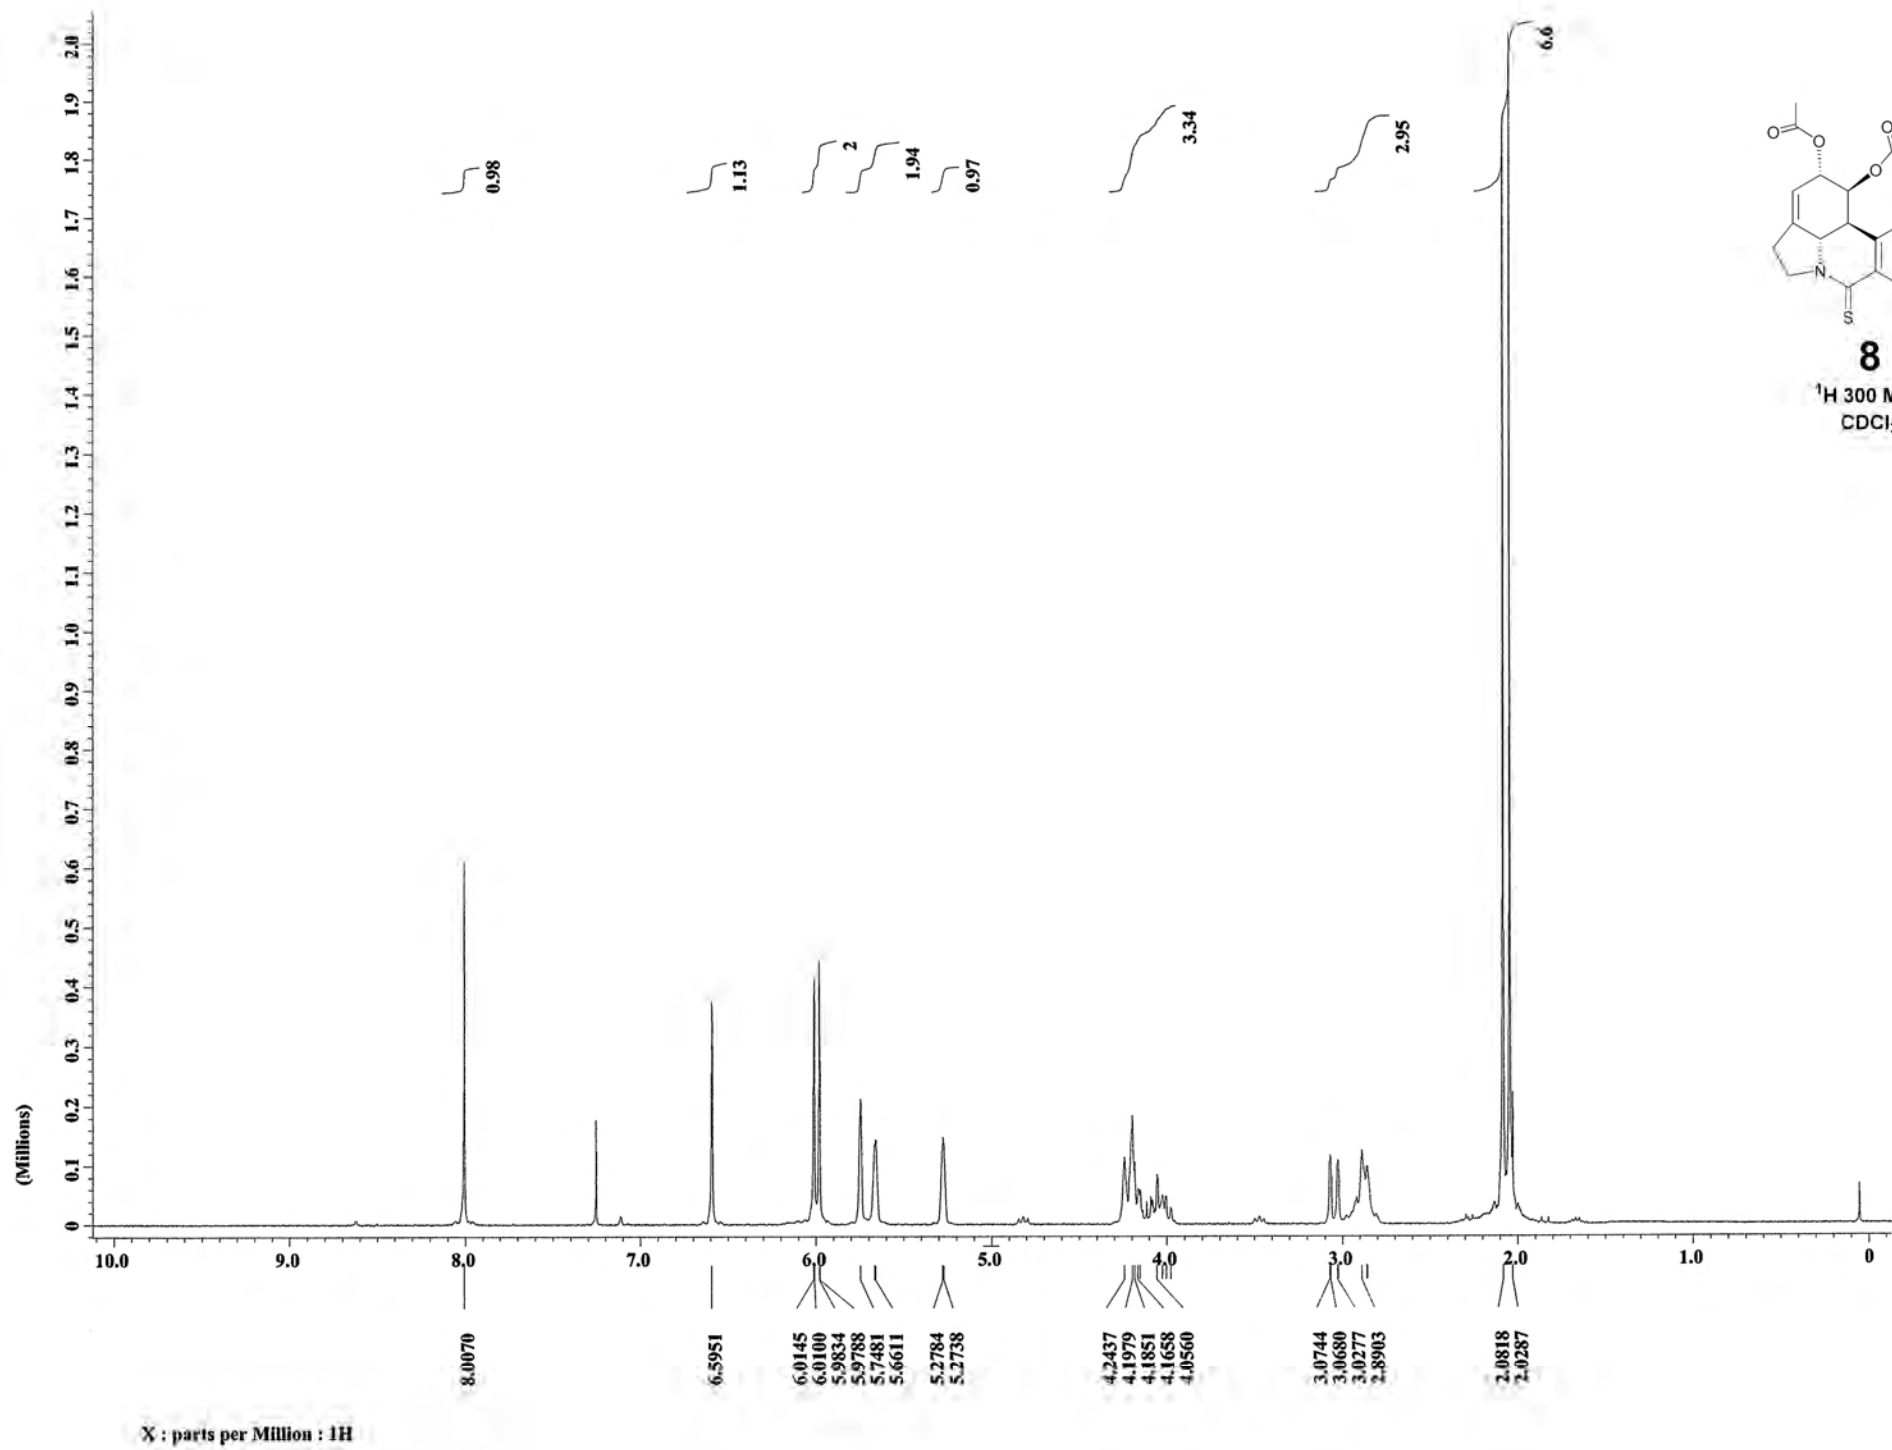

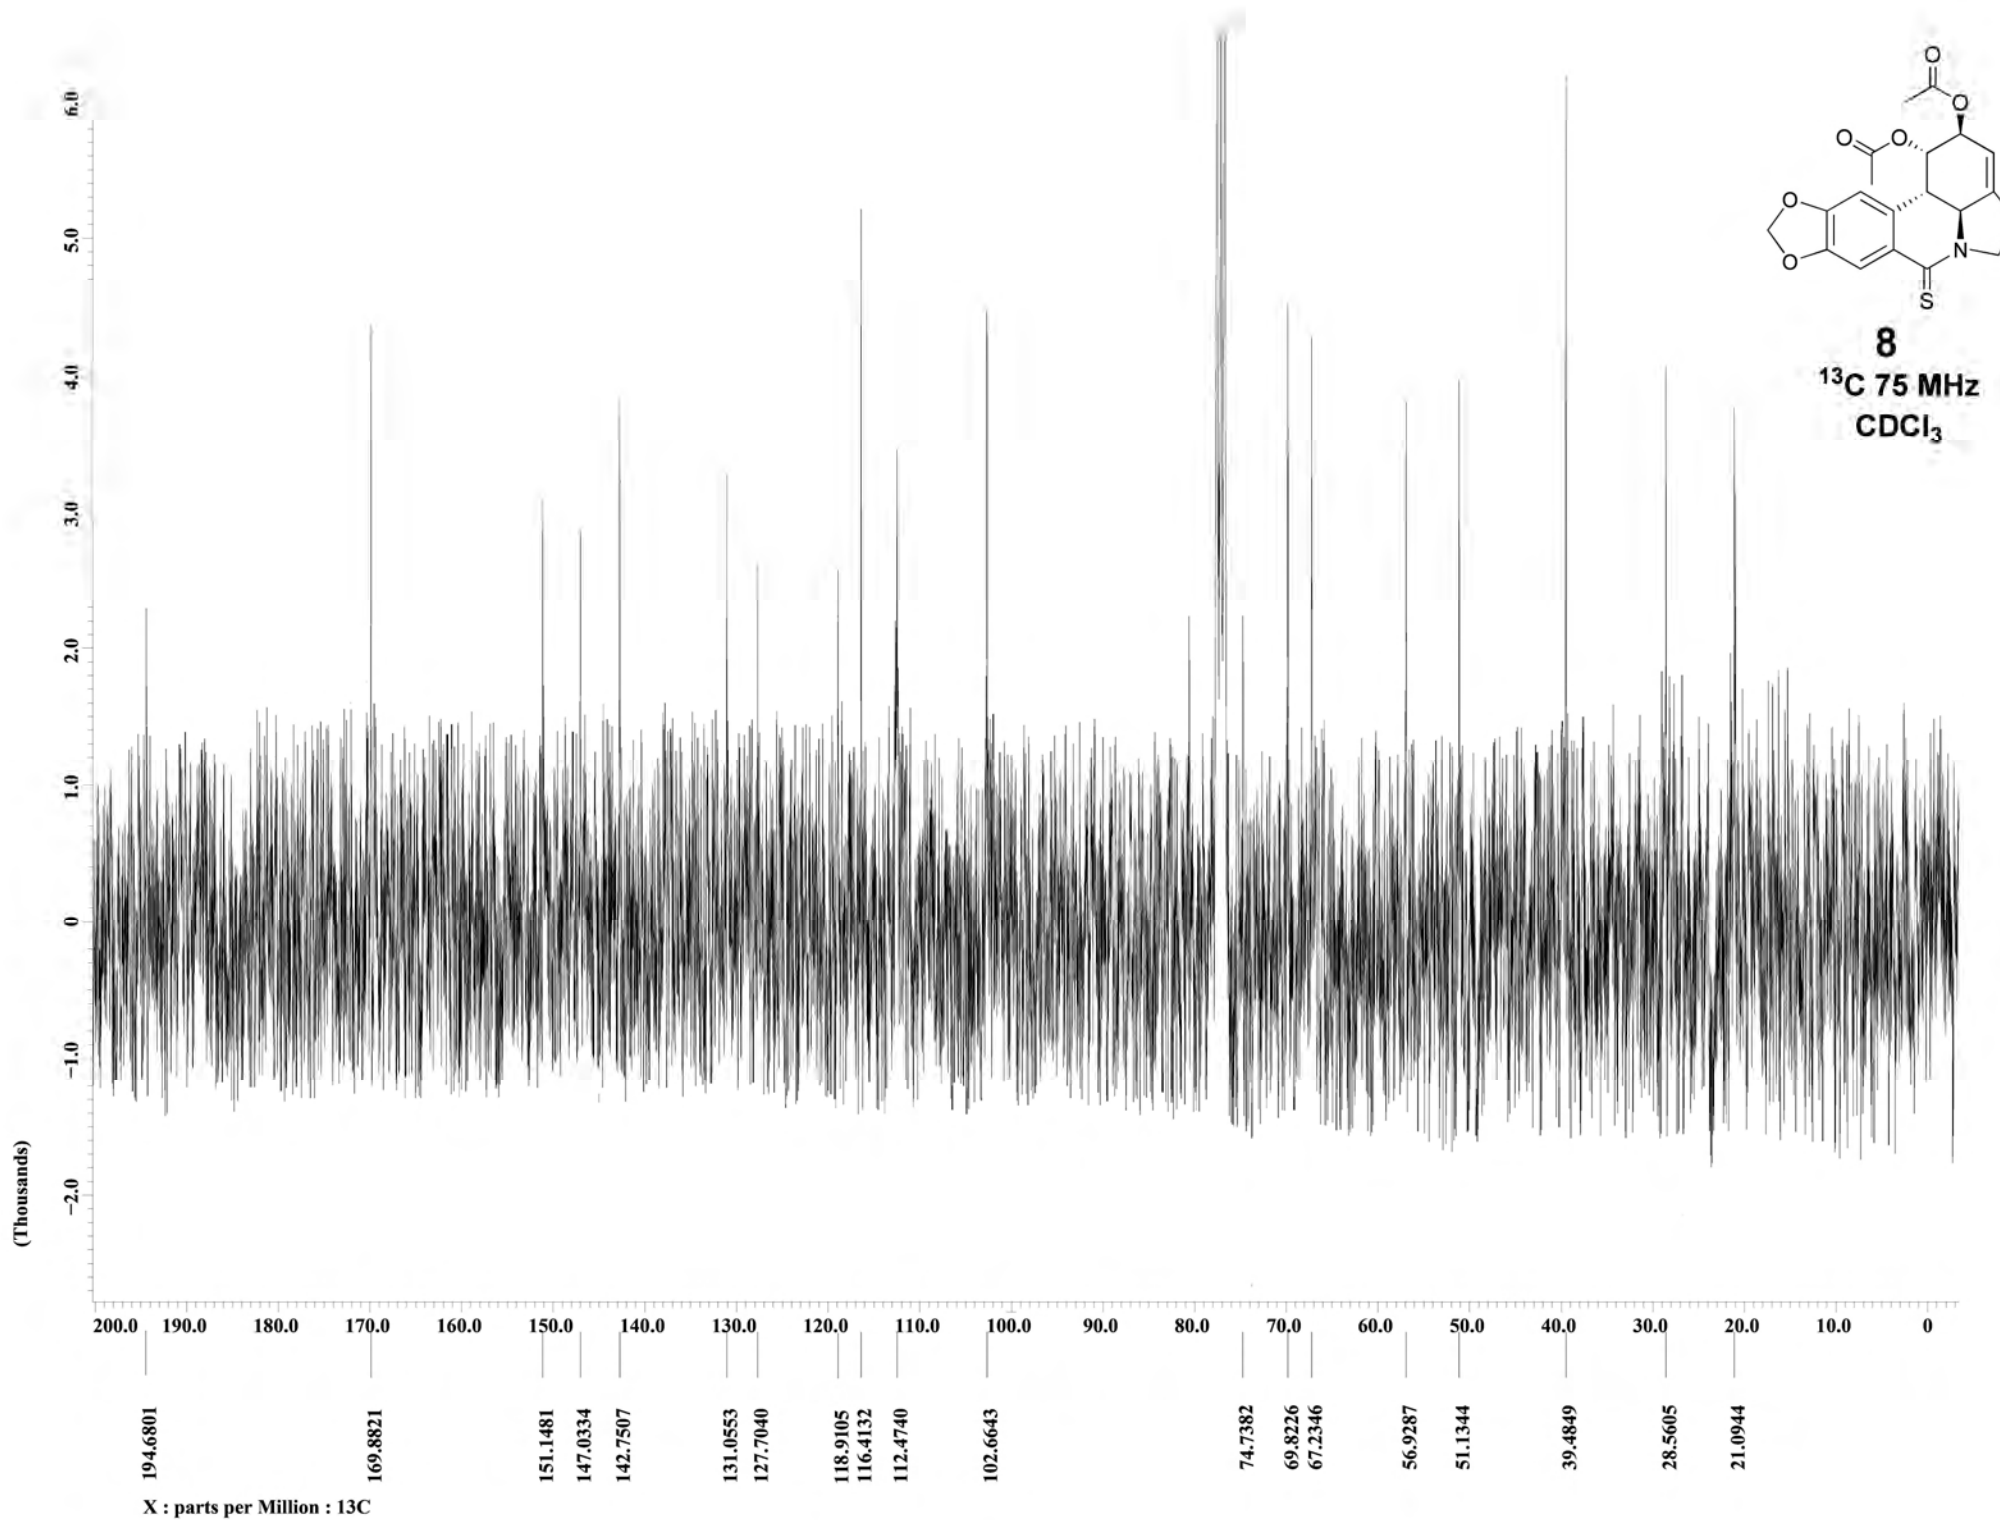

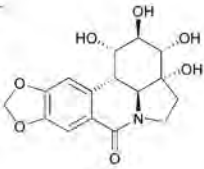

**9**

<sup>1</sup>H 300 MHz  
CD<sub>3</sub>OD

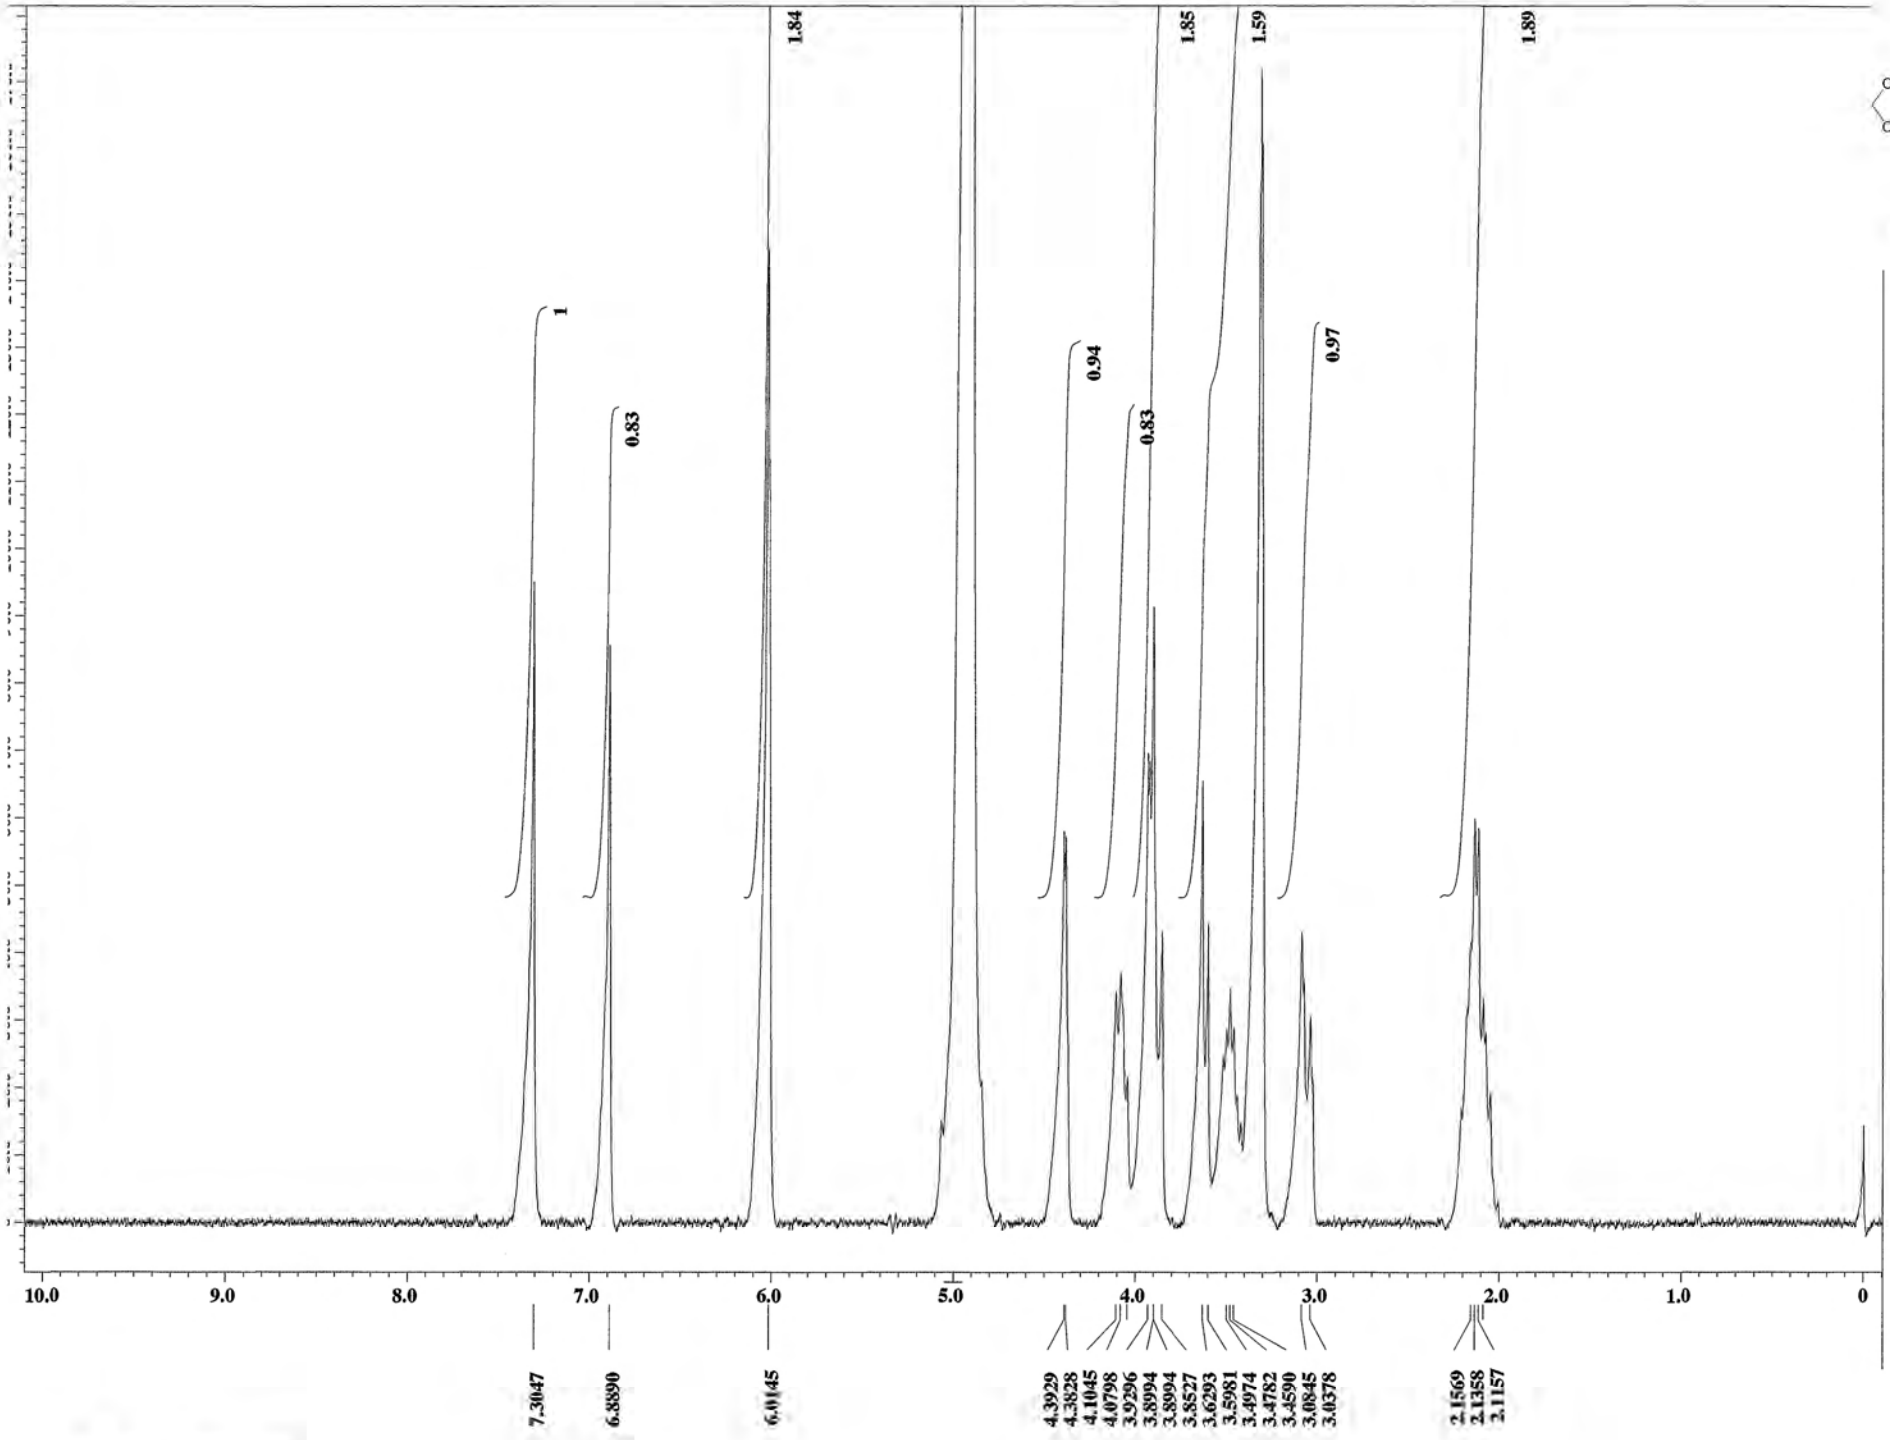

X : parts per Million : 1H

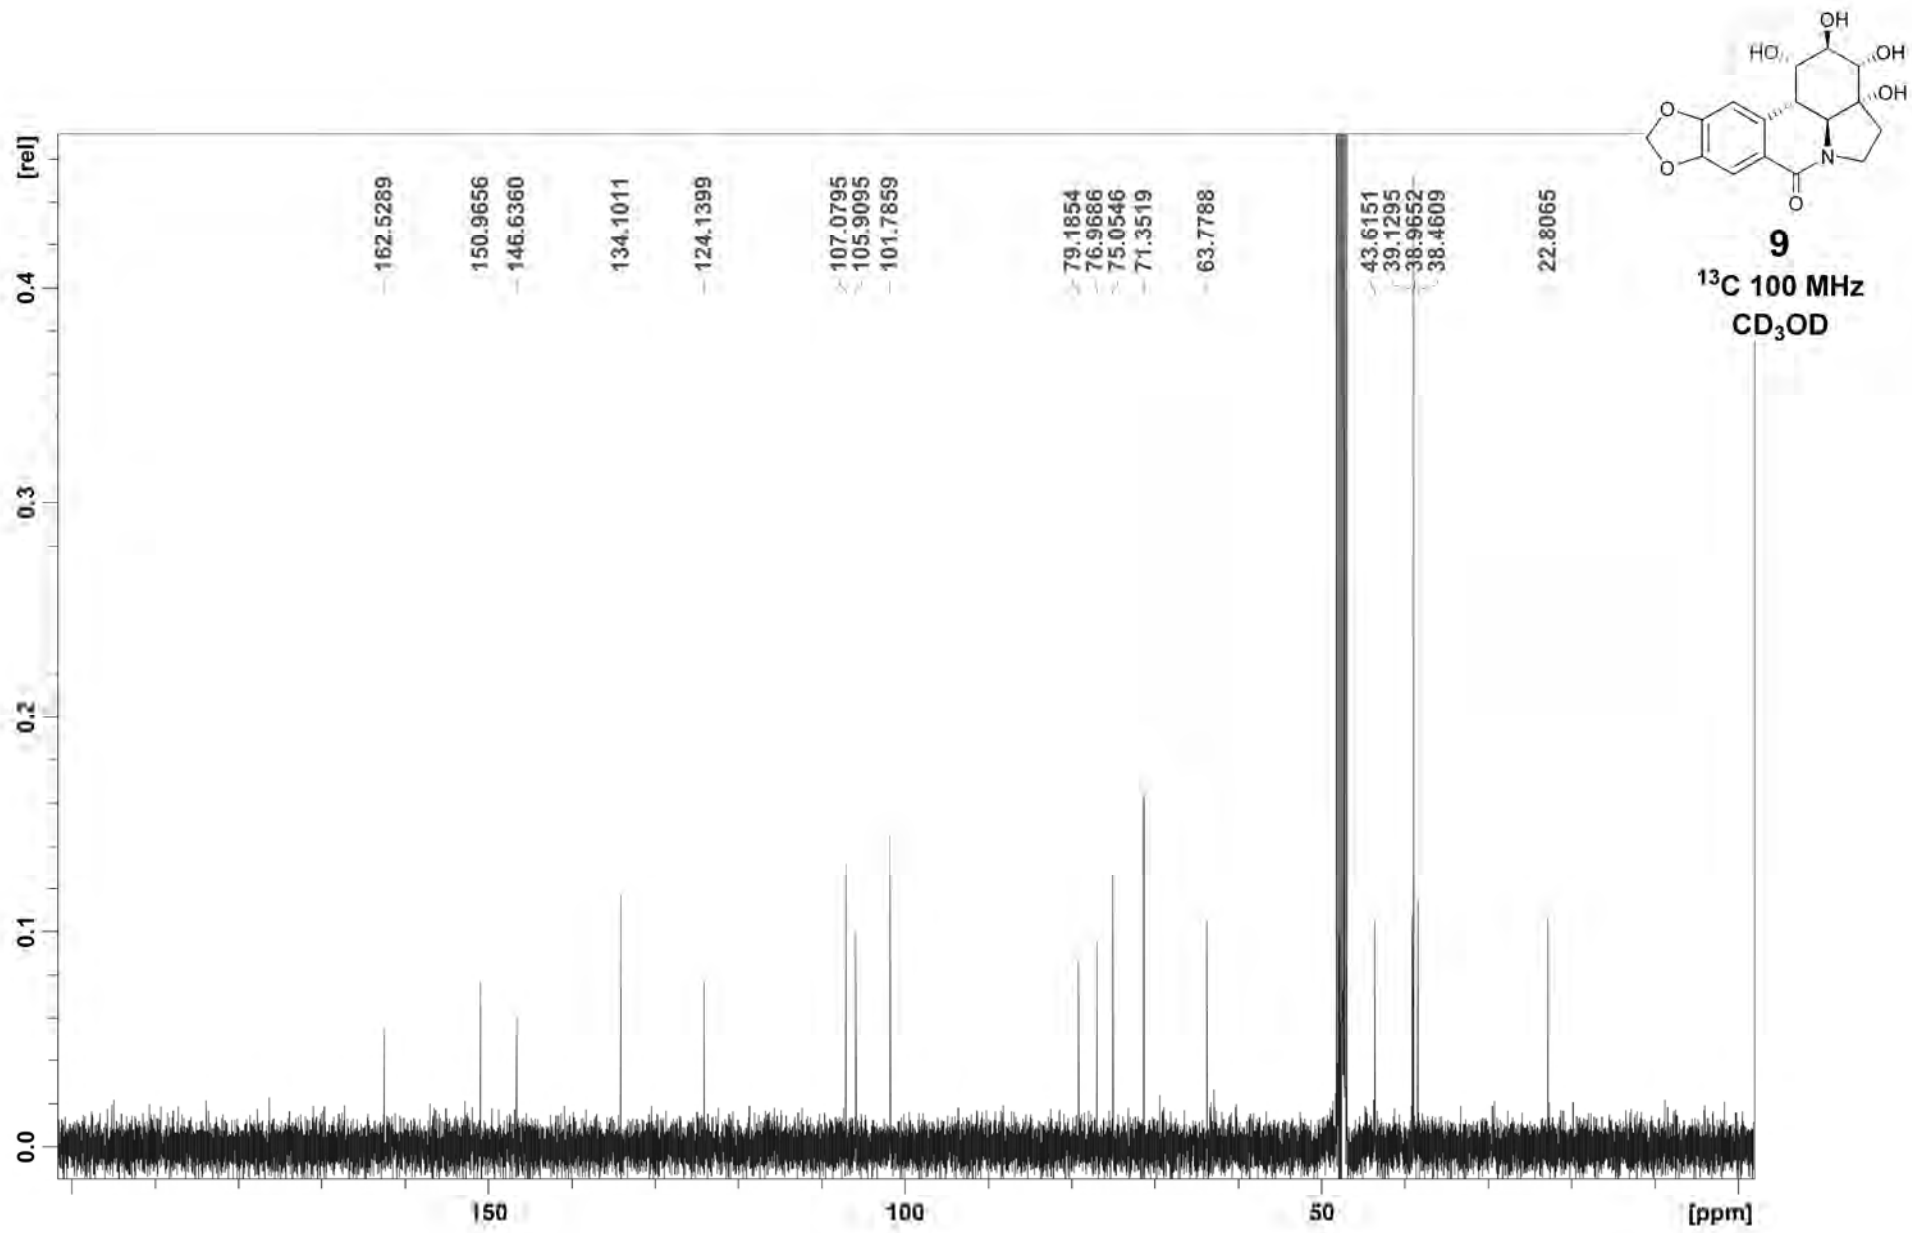

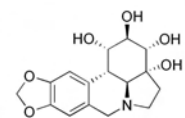

**10**

<sup>1</sup>H 300 MHz  
CD<sub>3</sub>OD

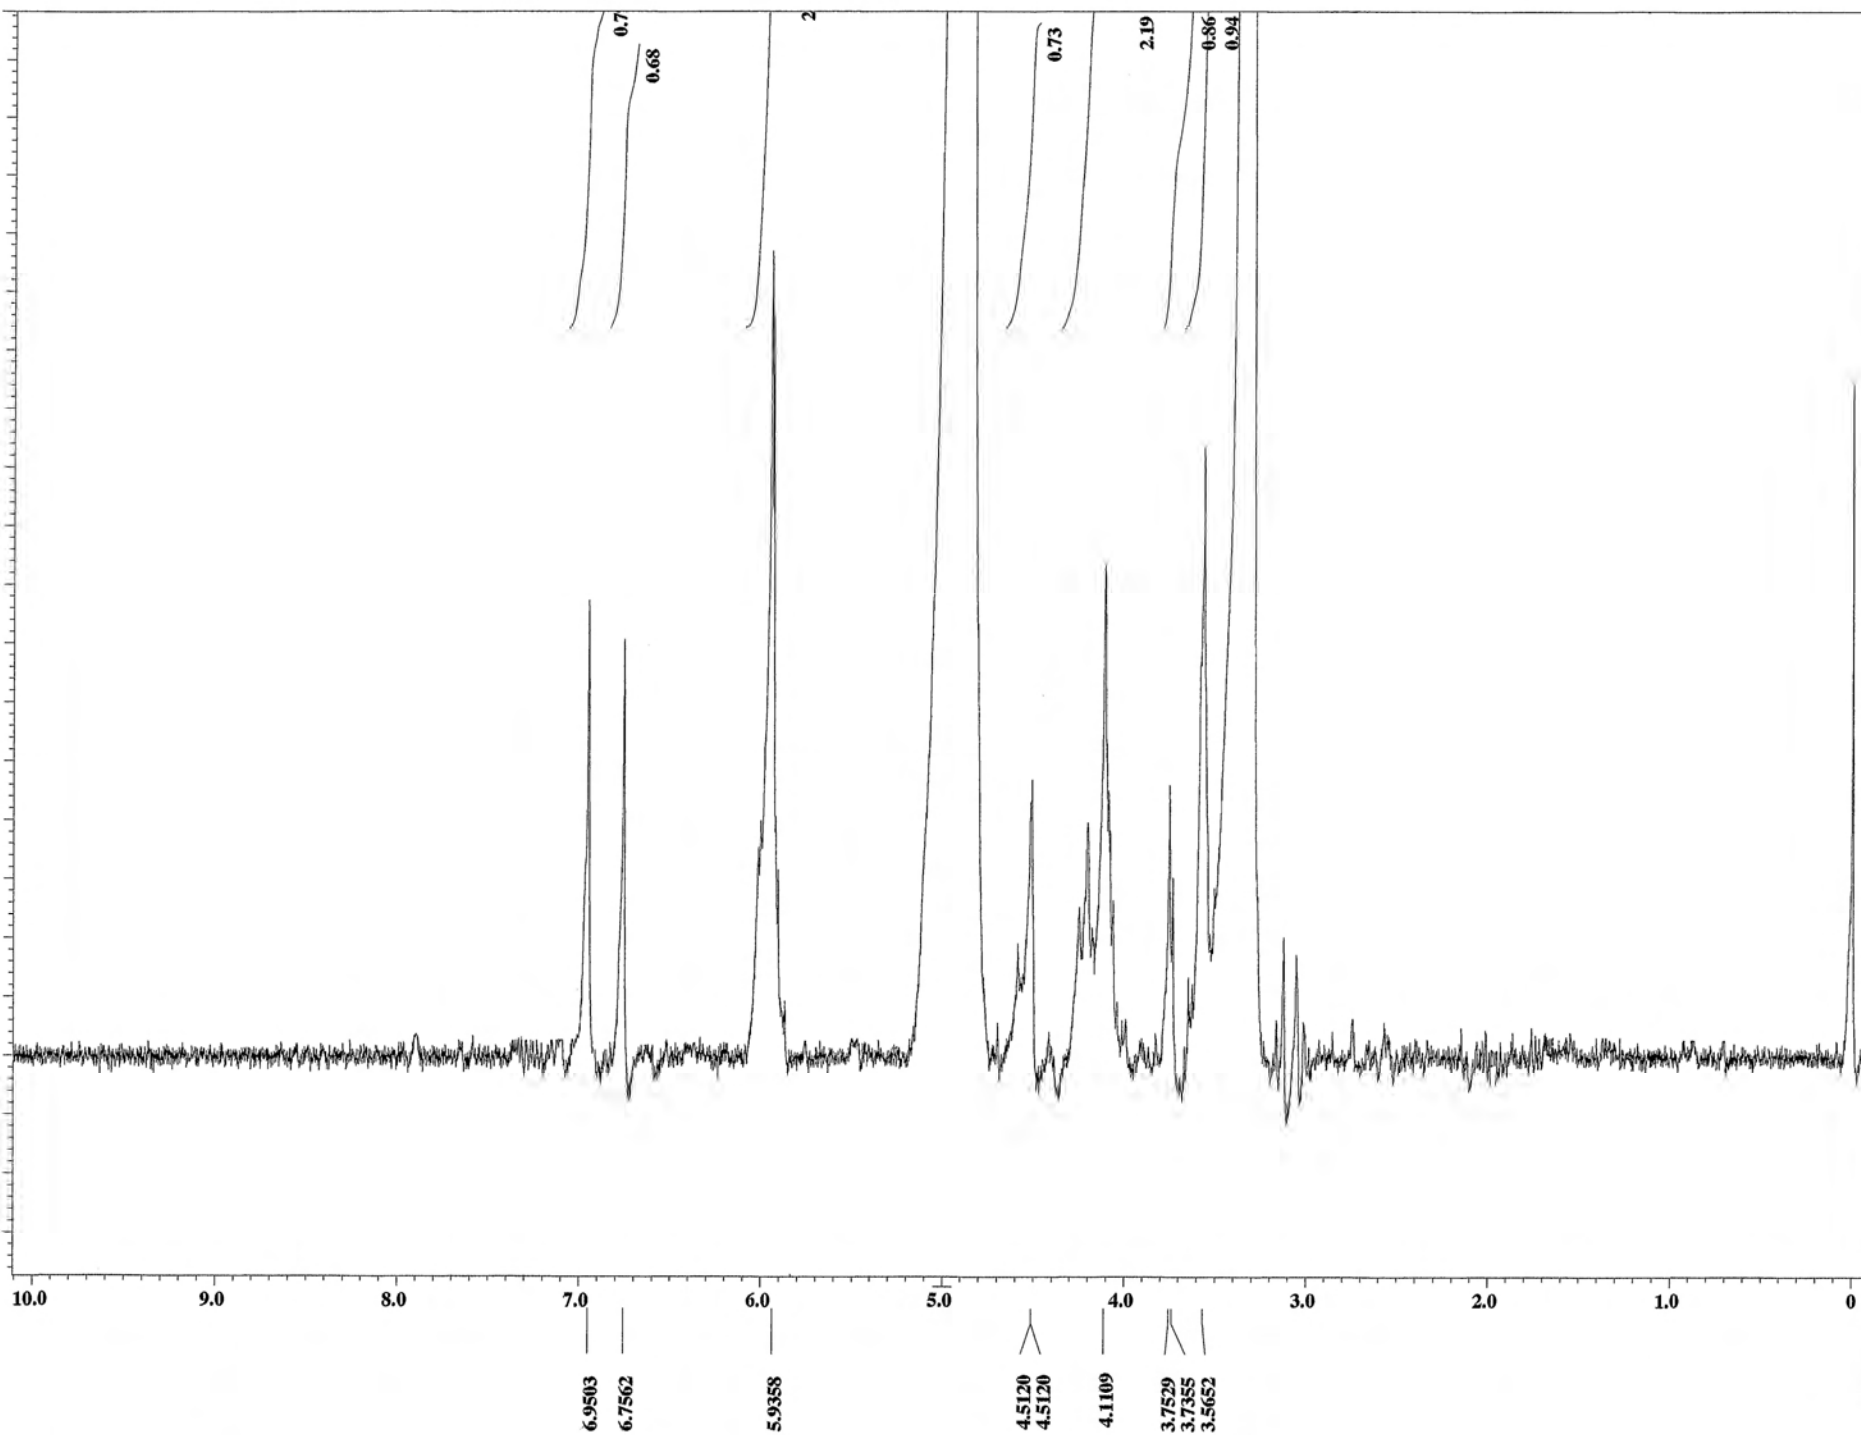

X : parts per Million : 1H

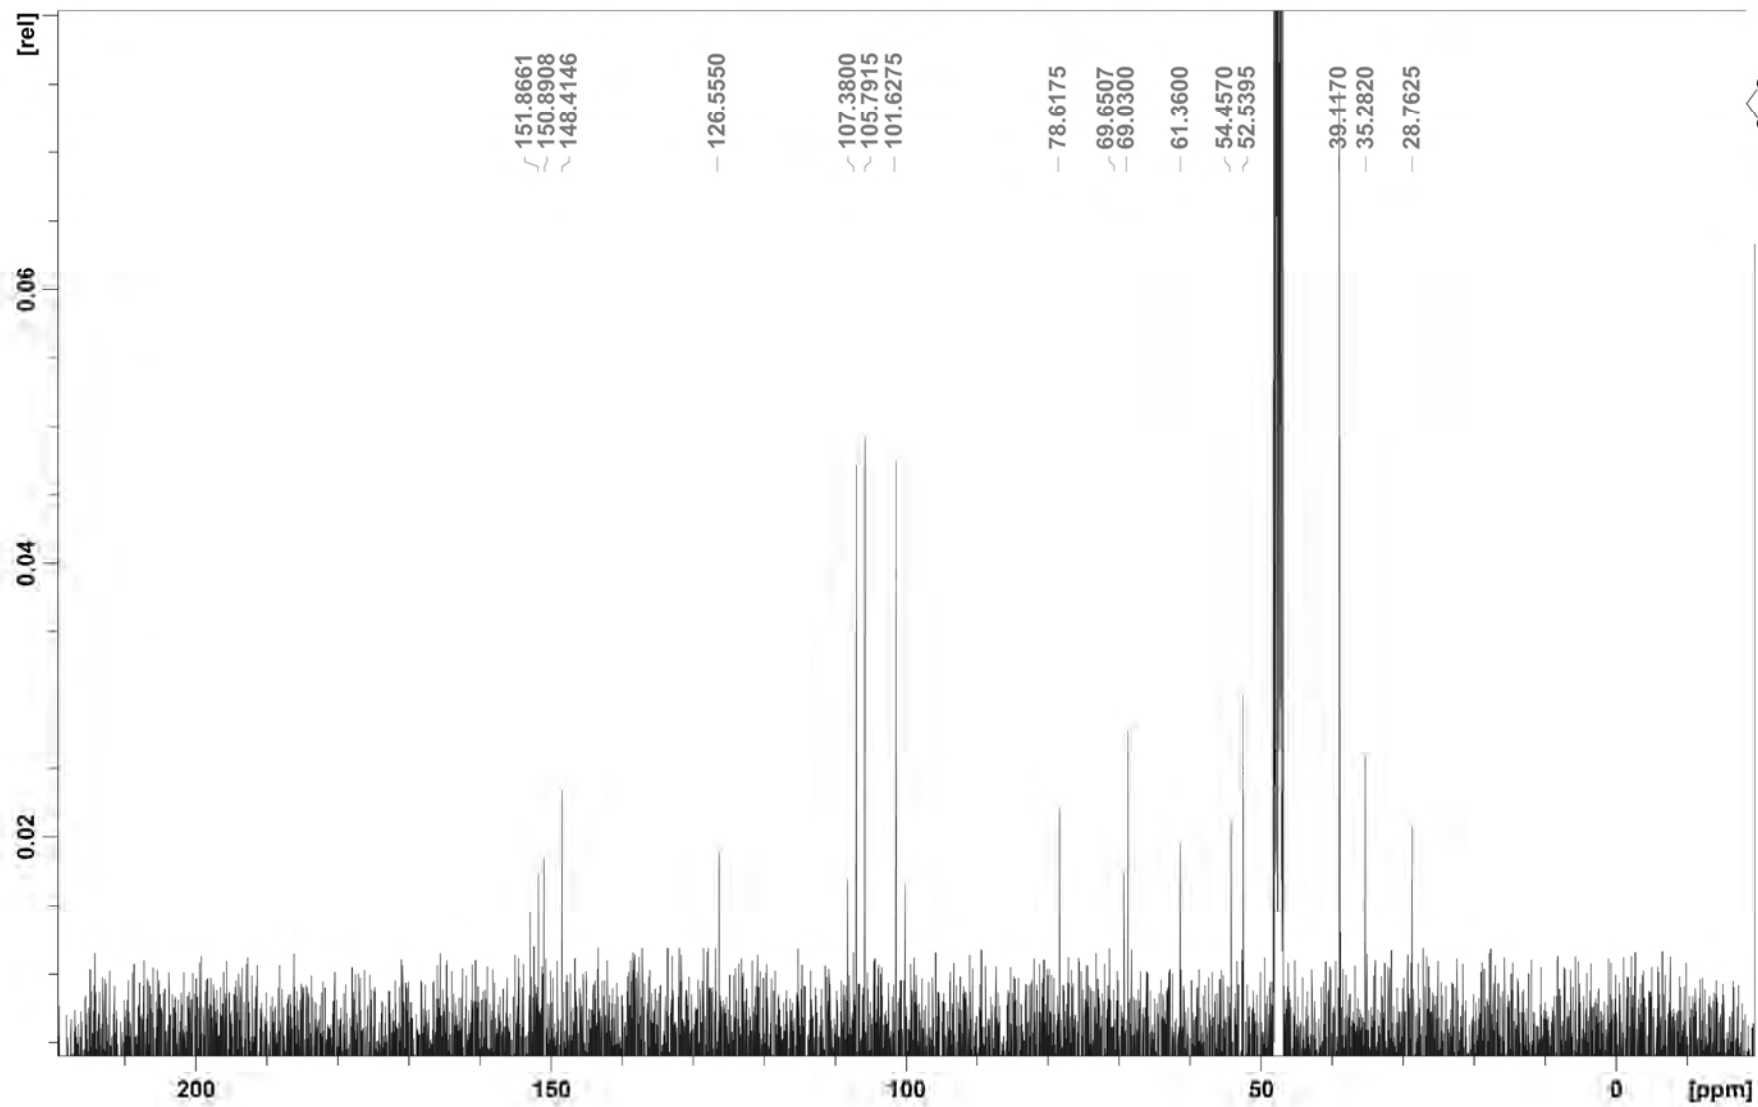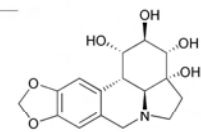

**10**  
<sup>13</sup>C 100 MHz  
 CD<sub>3</sub>OD

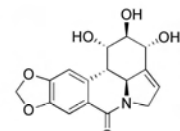

**13**

<sup>1</sup>H 300 MHz  
CD<sub>3</sub>OD

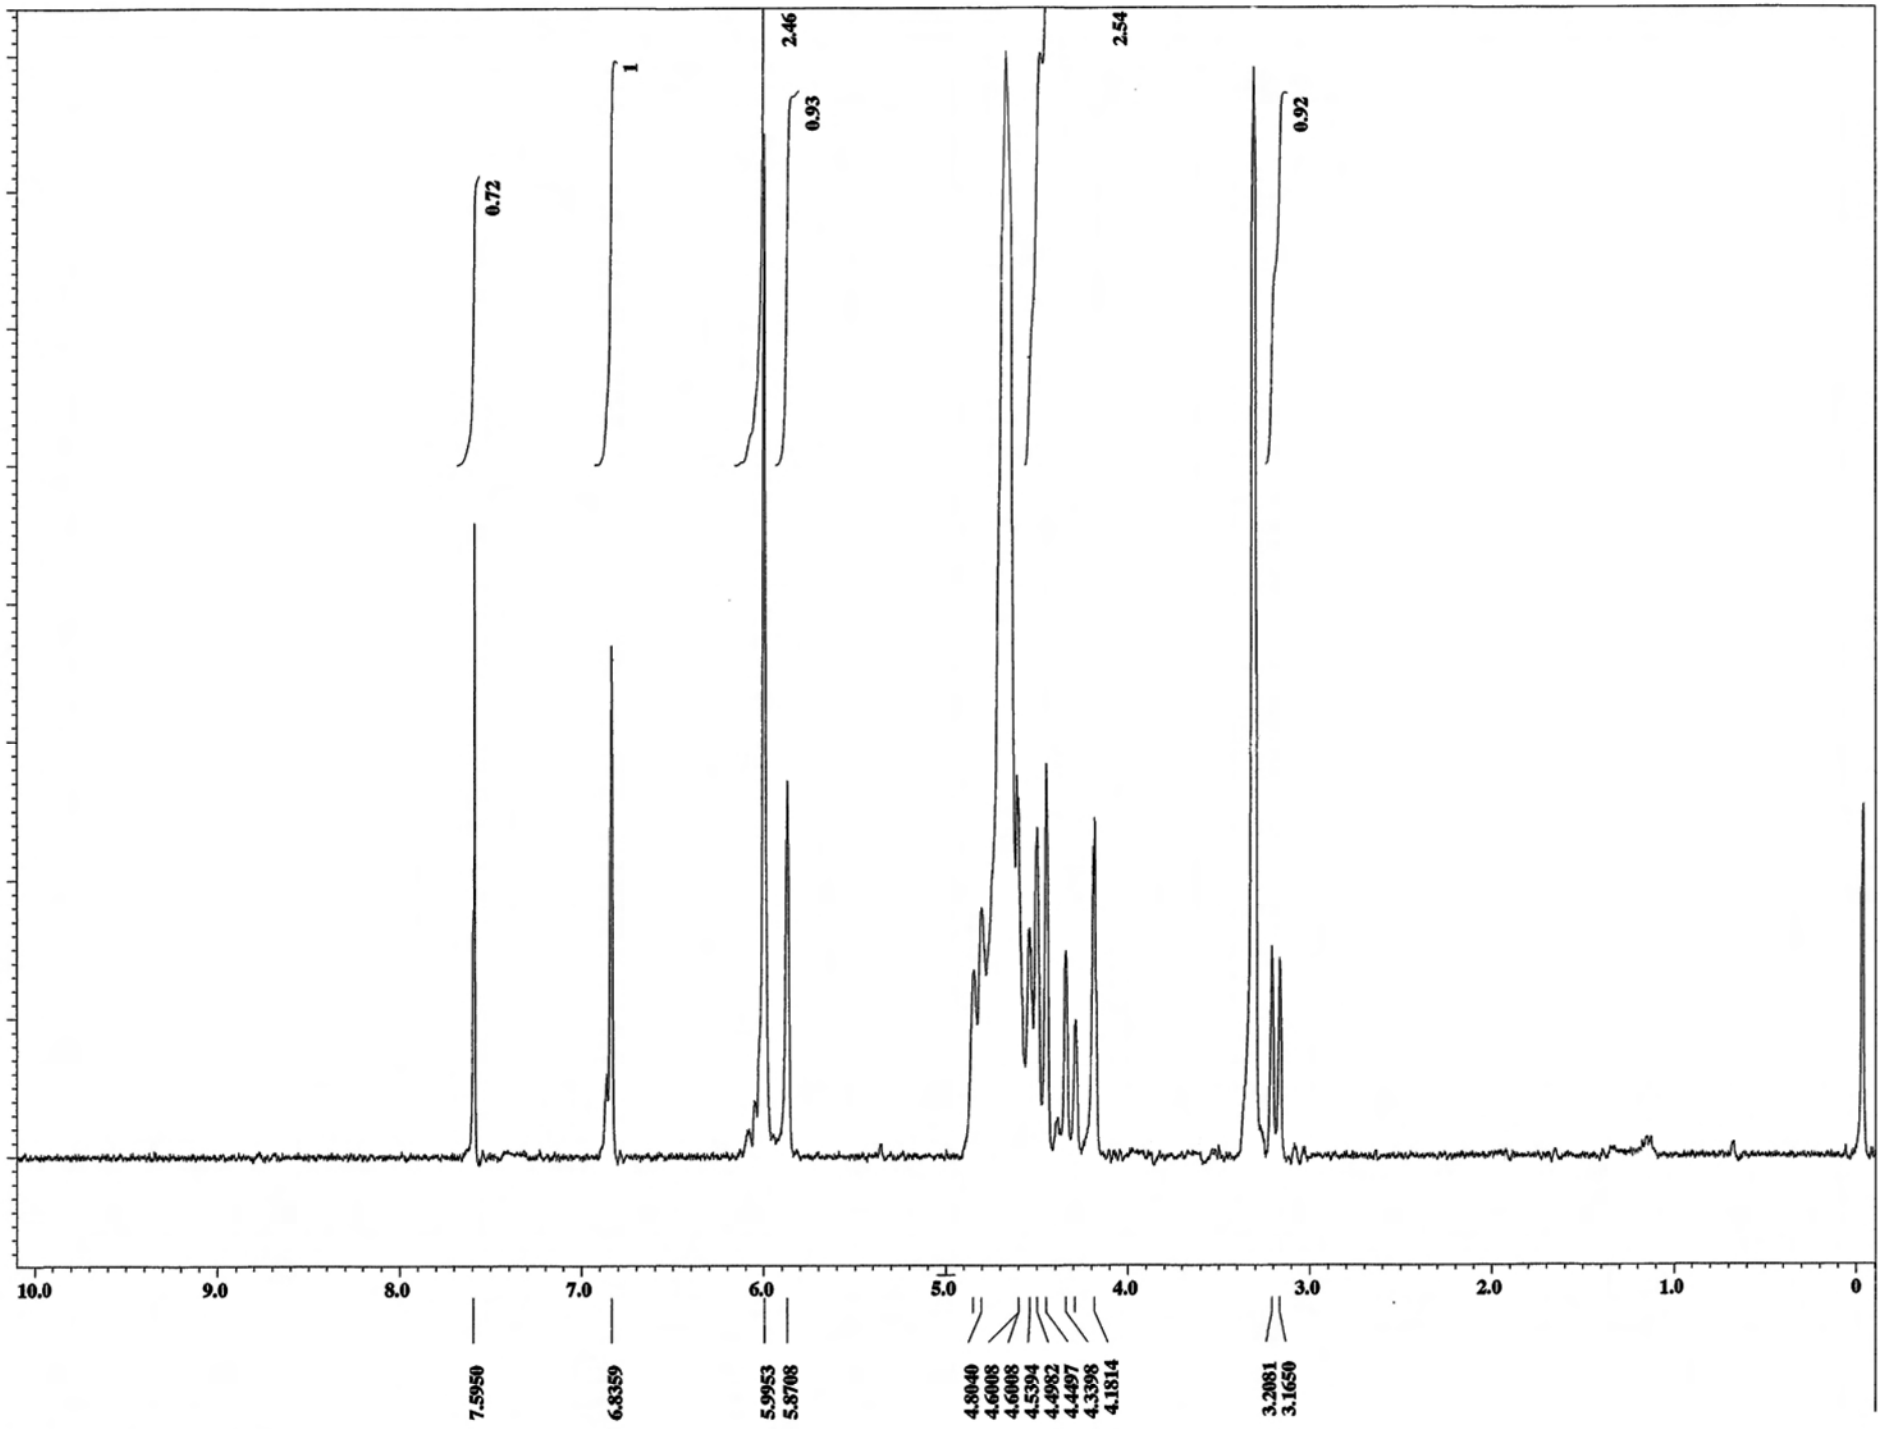

X : parts per Million : 1H



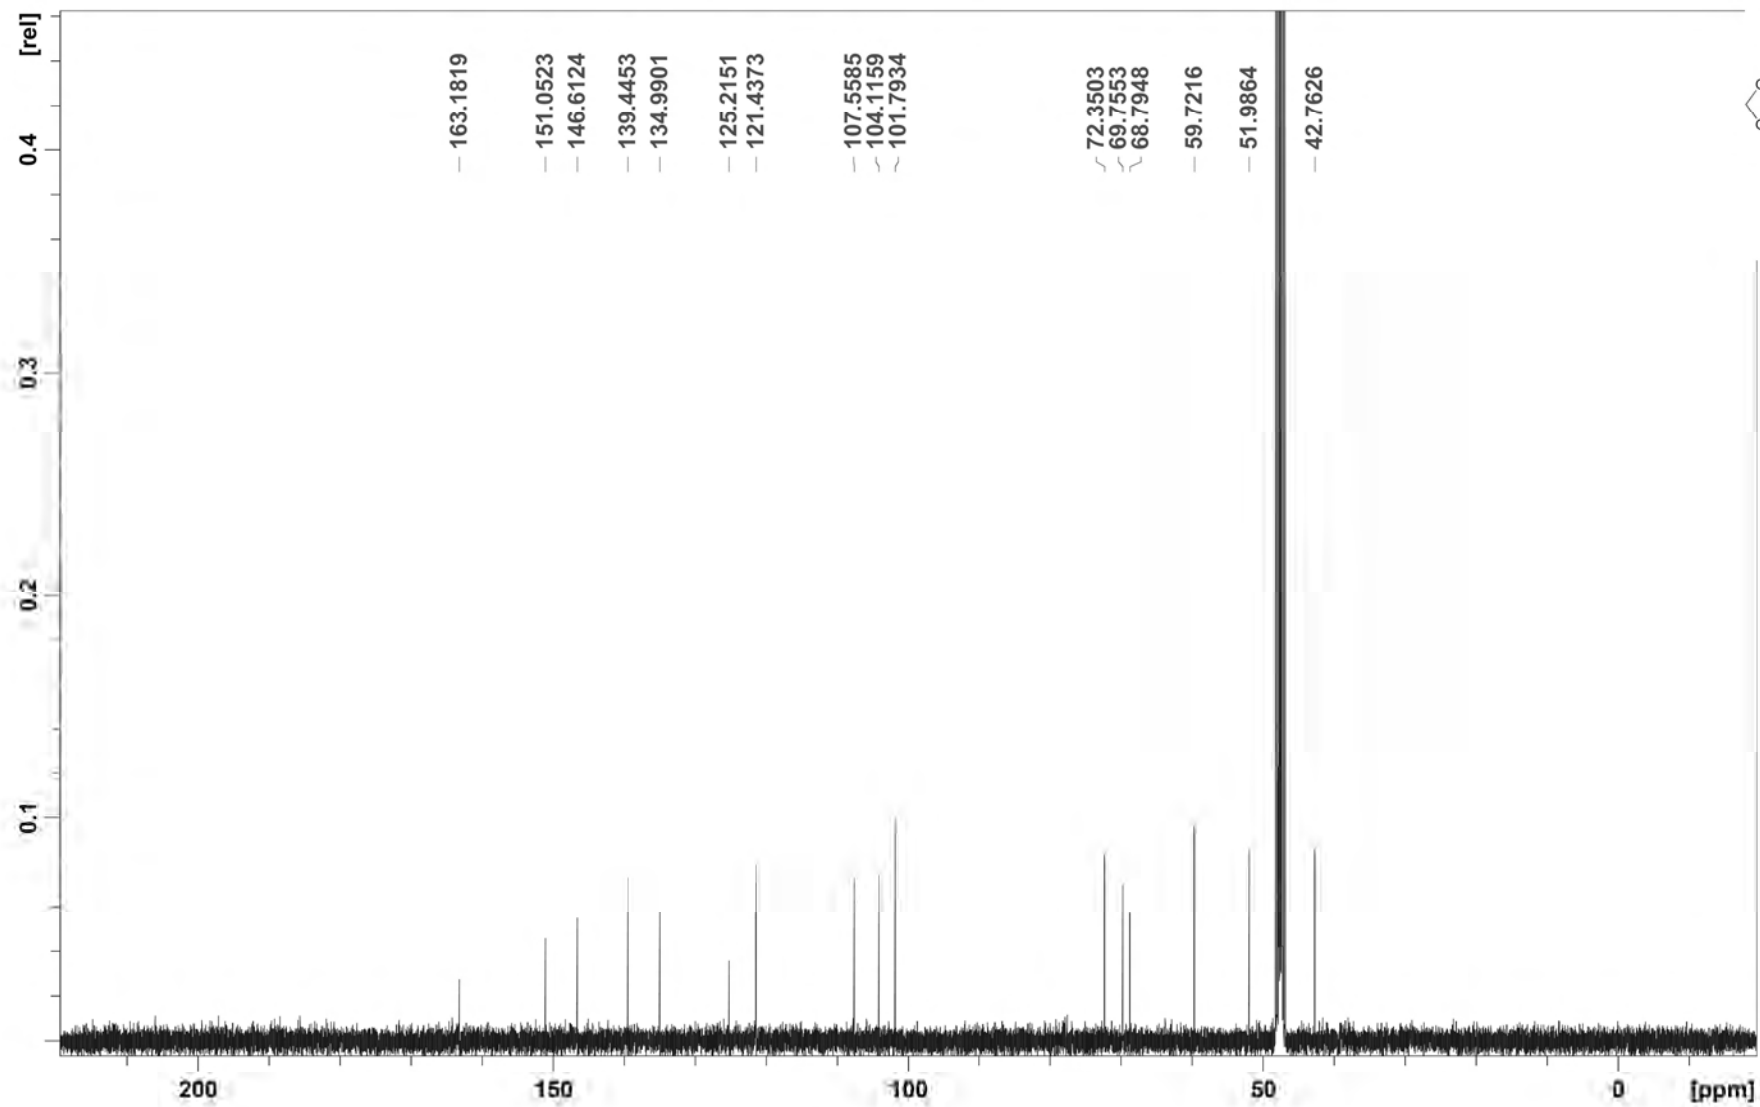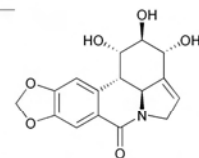

**13**  
<sup>13</sup>C 100 MHz  
CD<sub>3</sub>OD

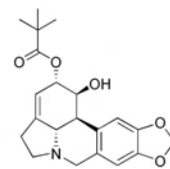

**15**  
<sup>1</sup>H 300 MHz  
CDCl<sub>3</sub>

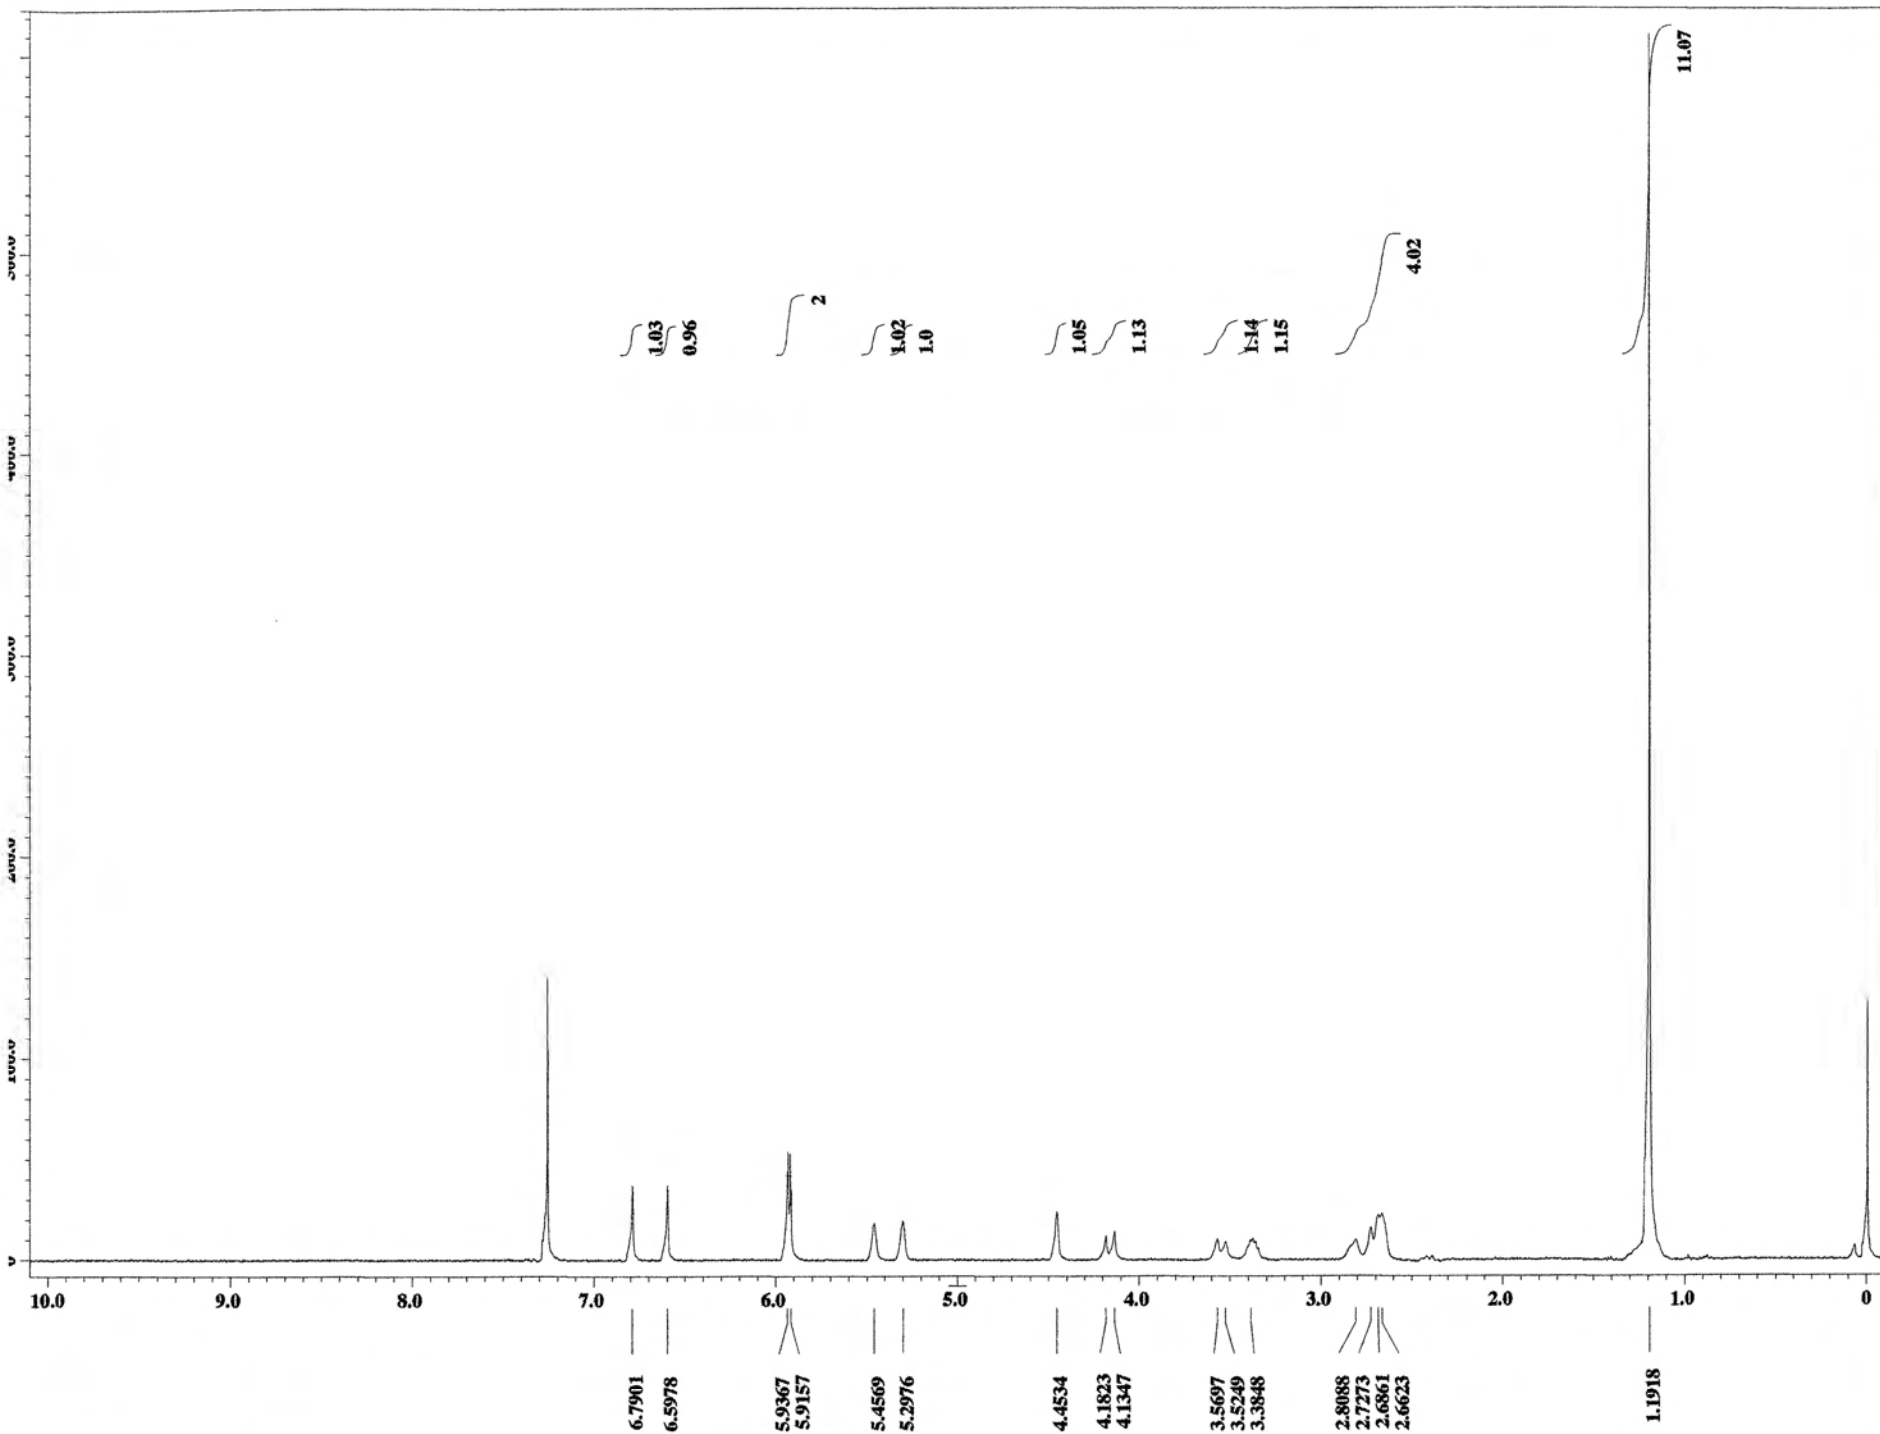

X : parts per Million : 1H

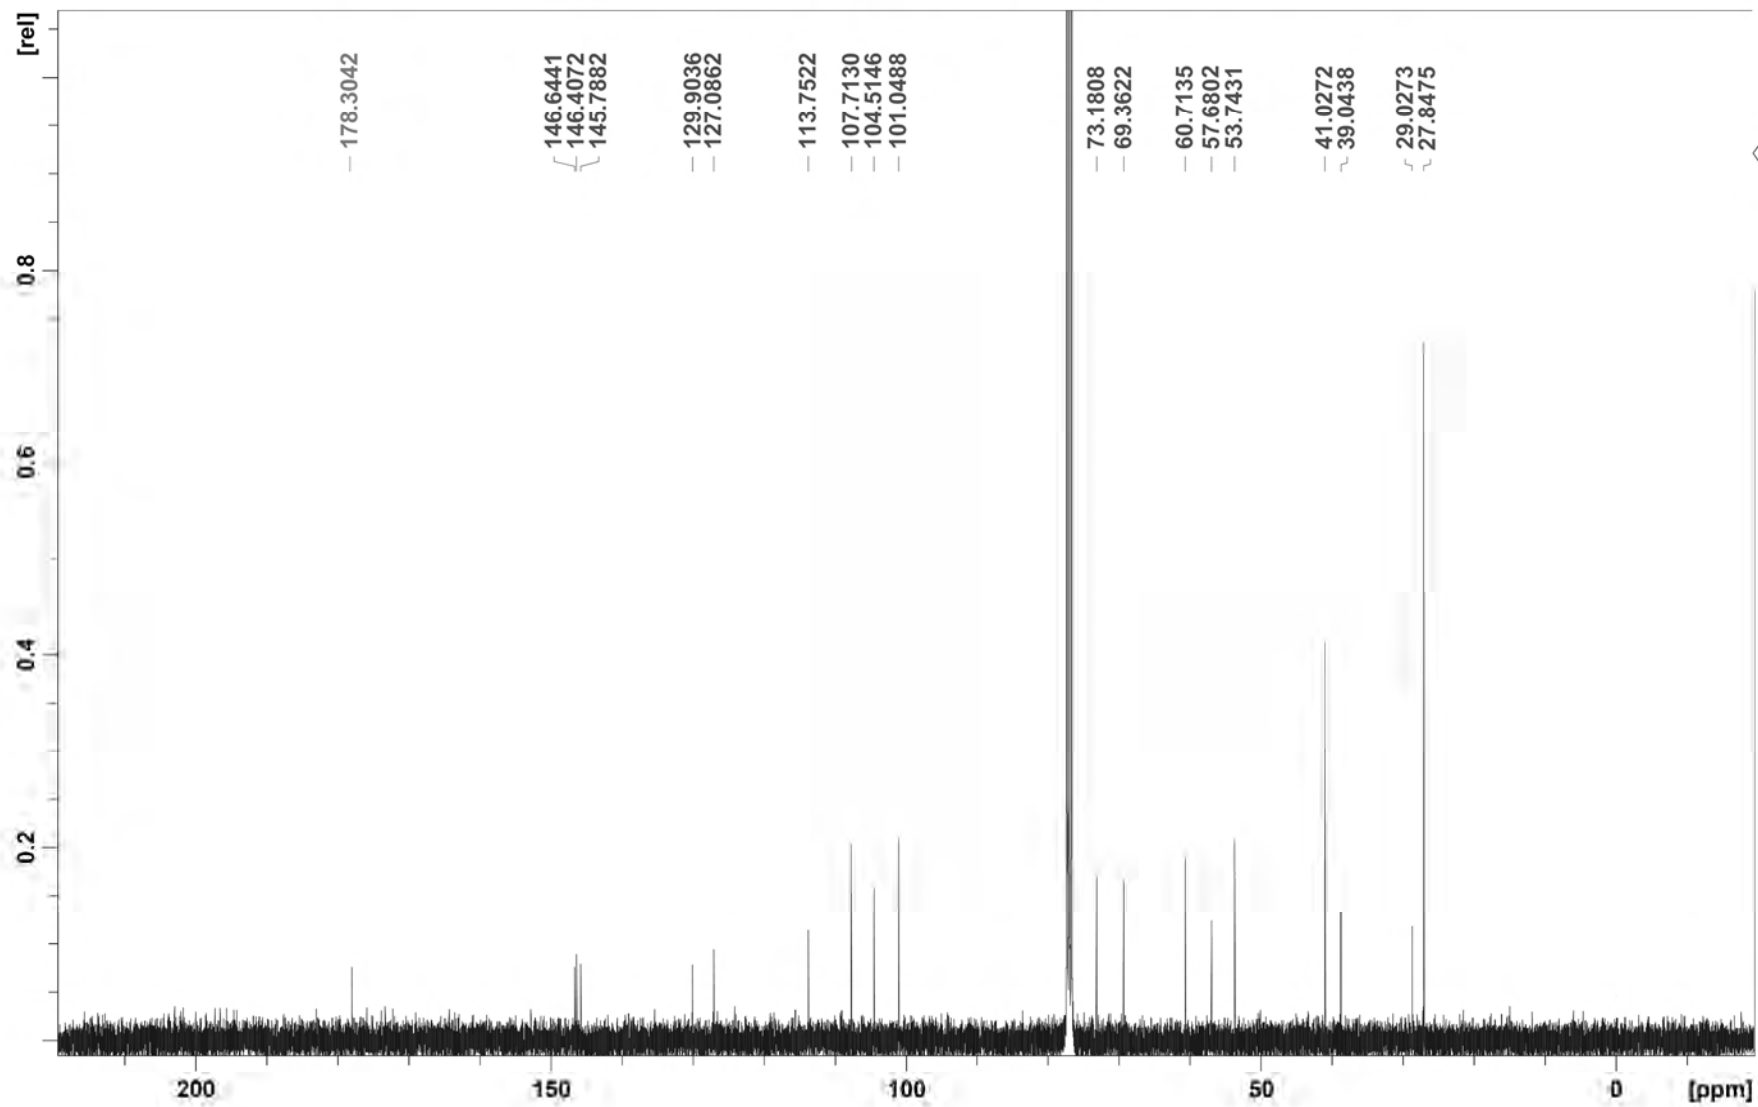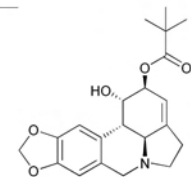

**15**  
<sup>13</sup>C 100 MHz  
 CDCl<sub>3</sub>

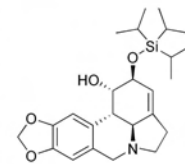

**16**

<sup>1</sup>H 300 MHz  
CDCl<sub>3</sub>

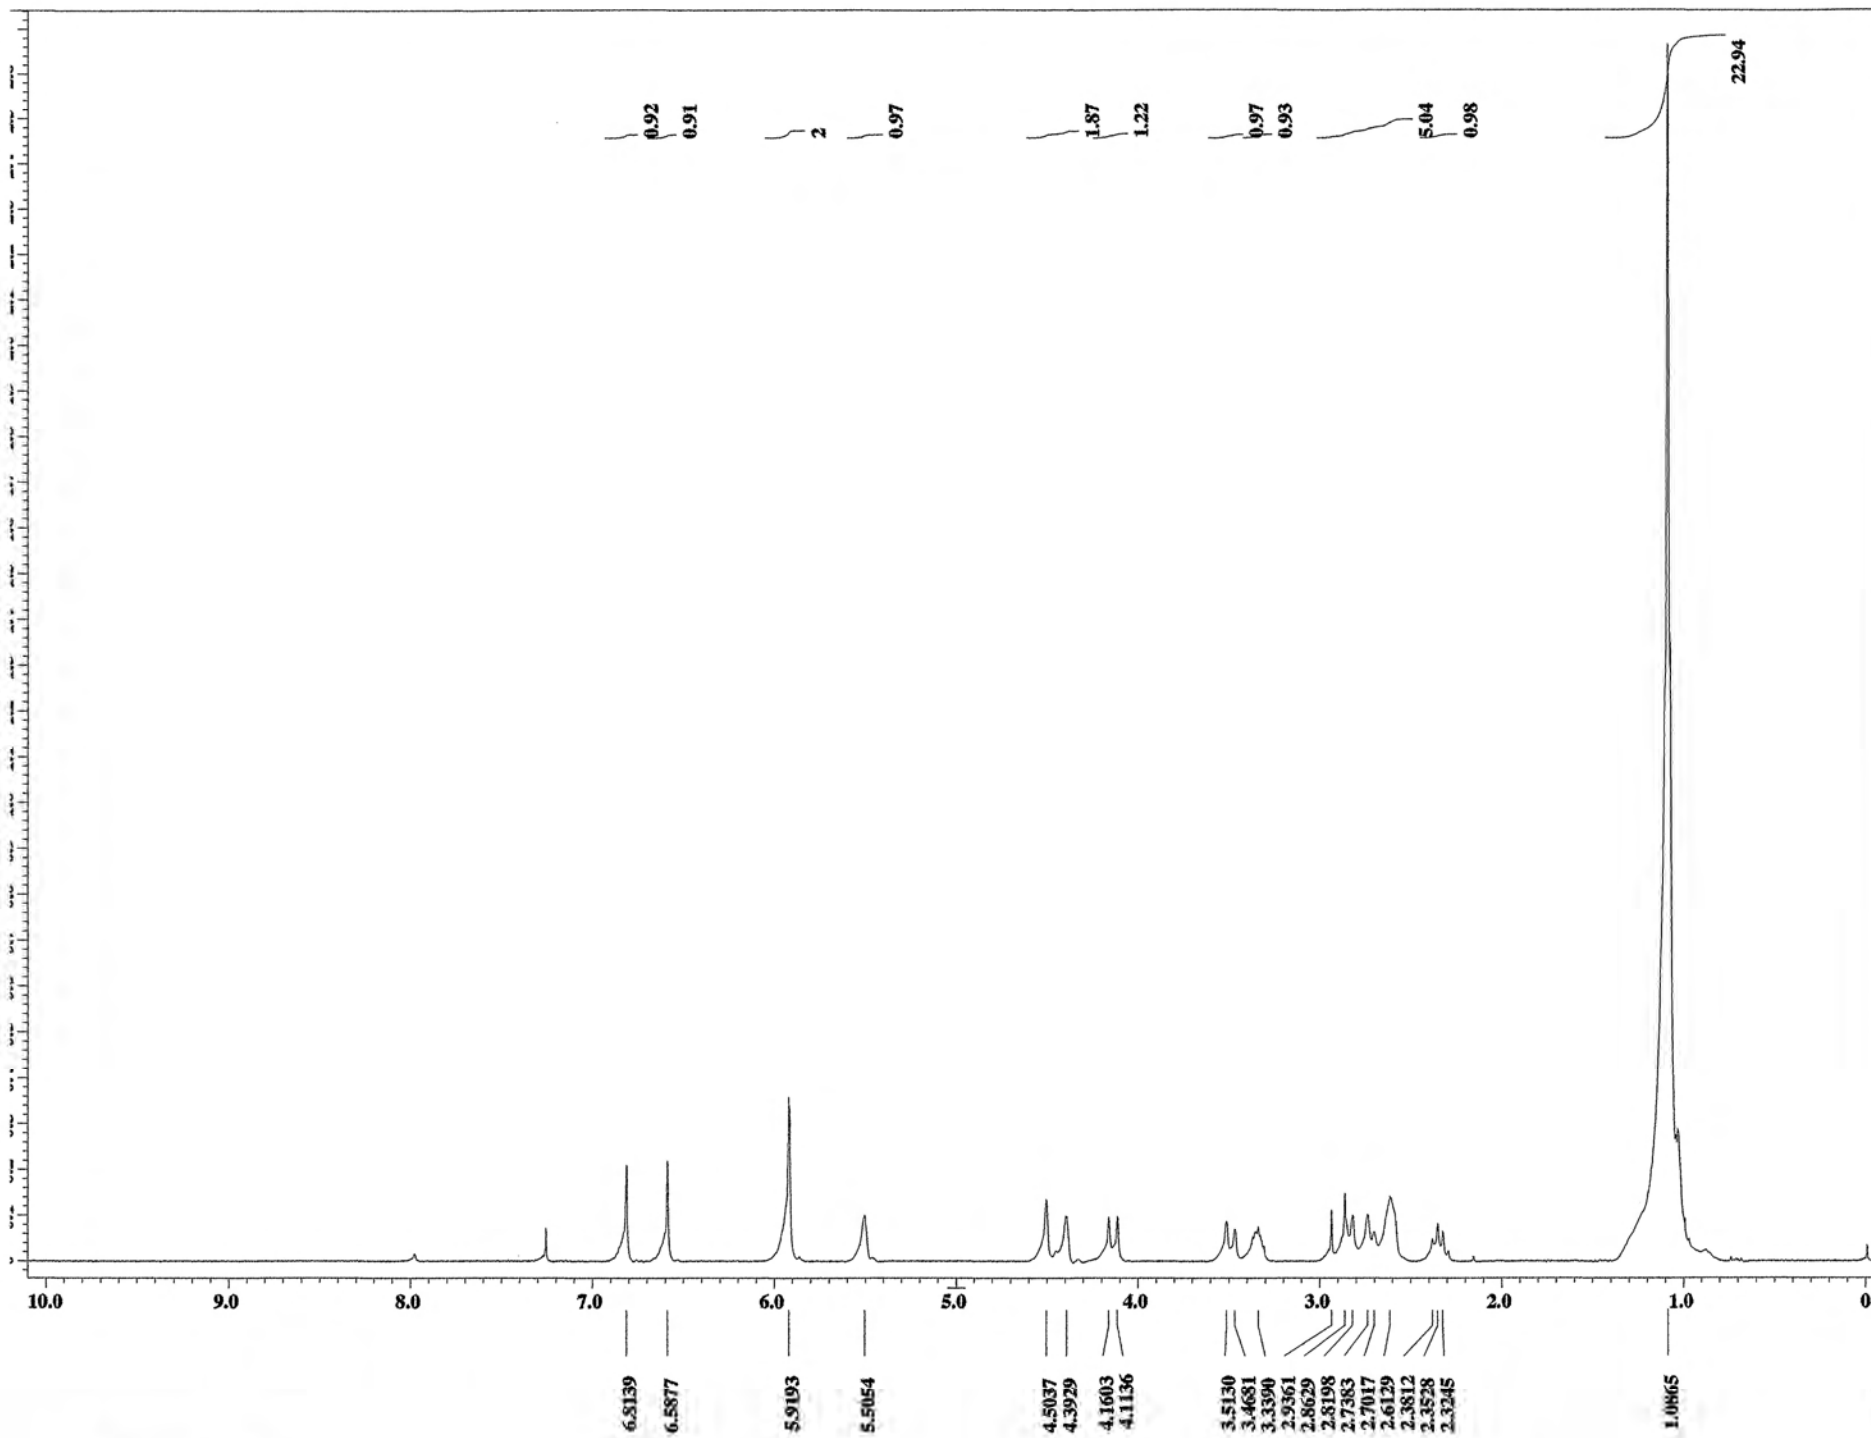

X : parts per Million : 1H

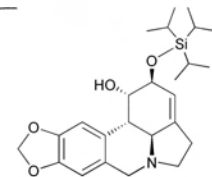

**16**  
<sup>13</sup>C 75 MHz  
CDCl<sub>3</sub>

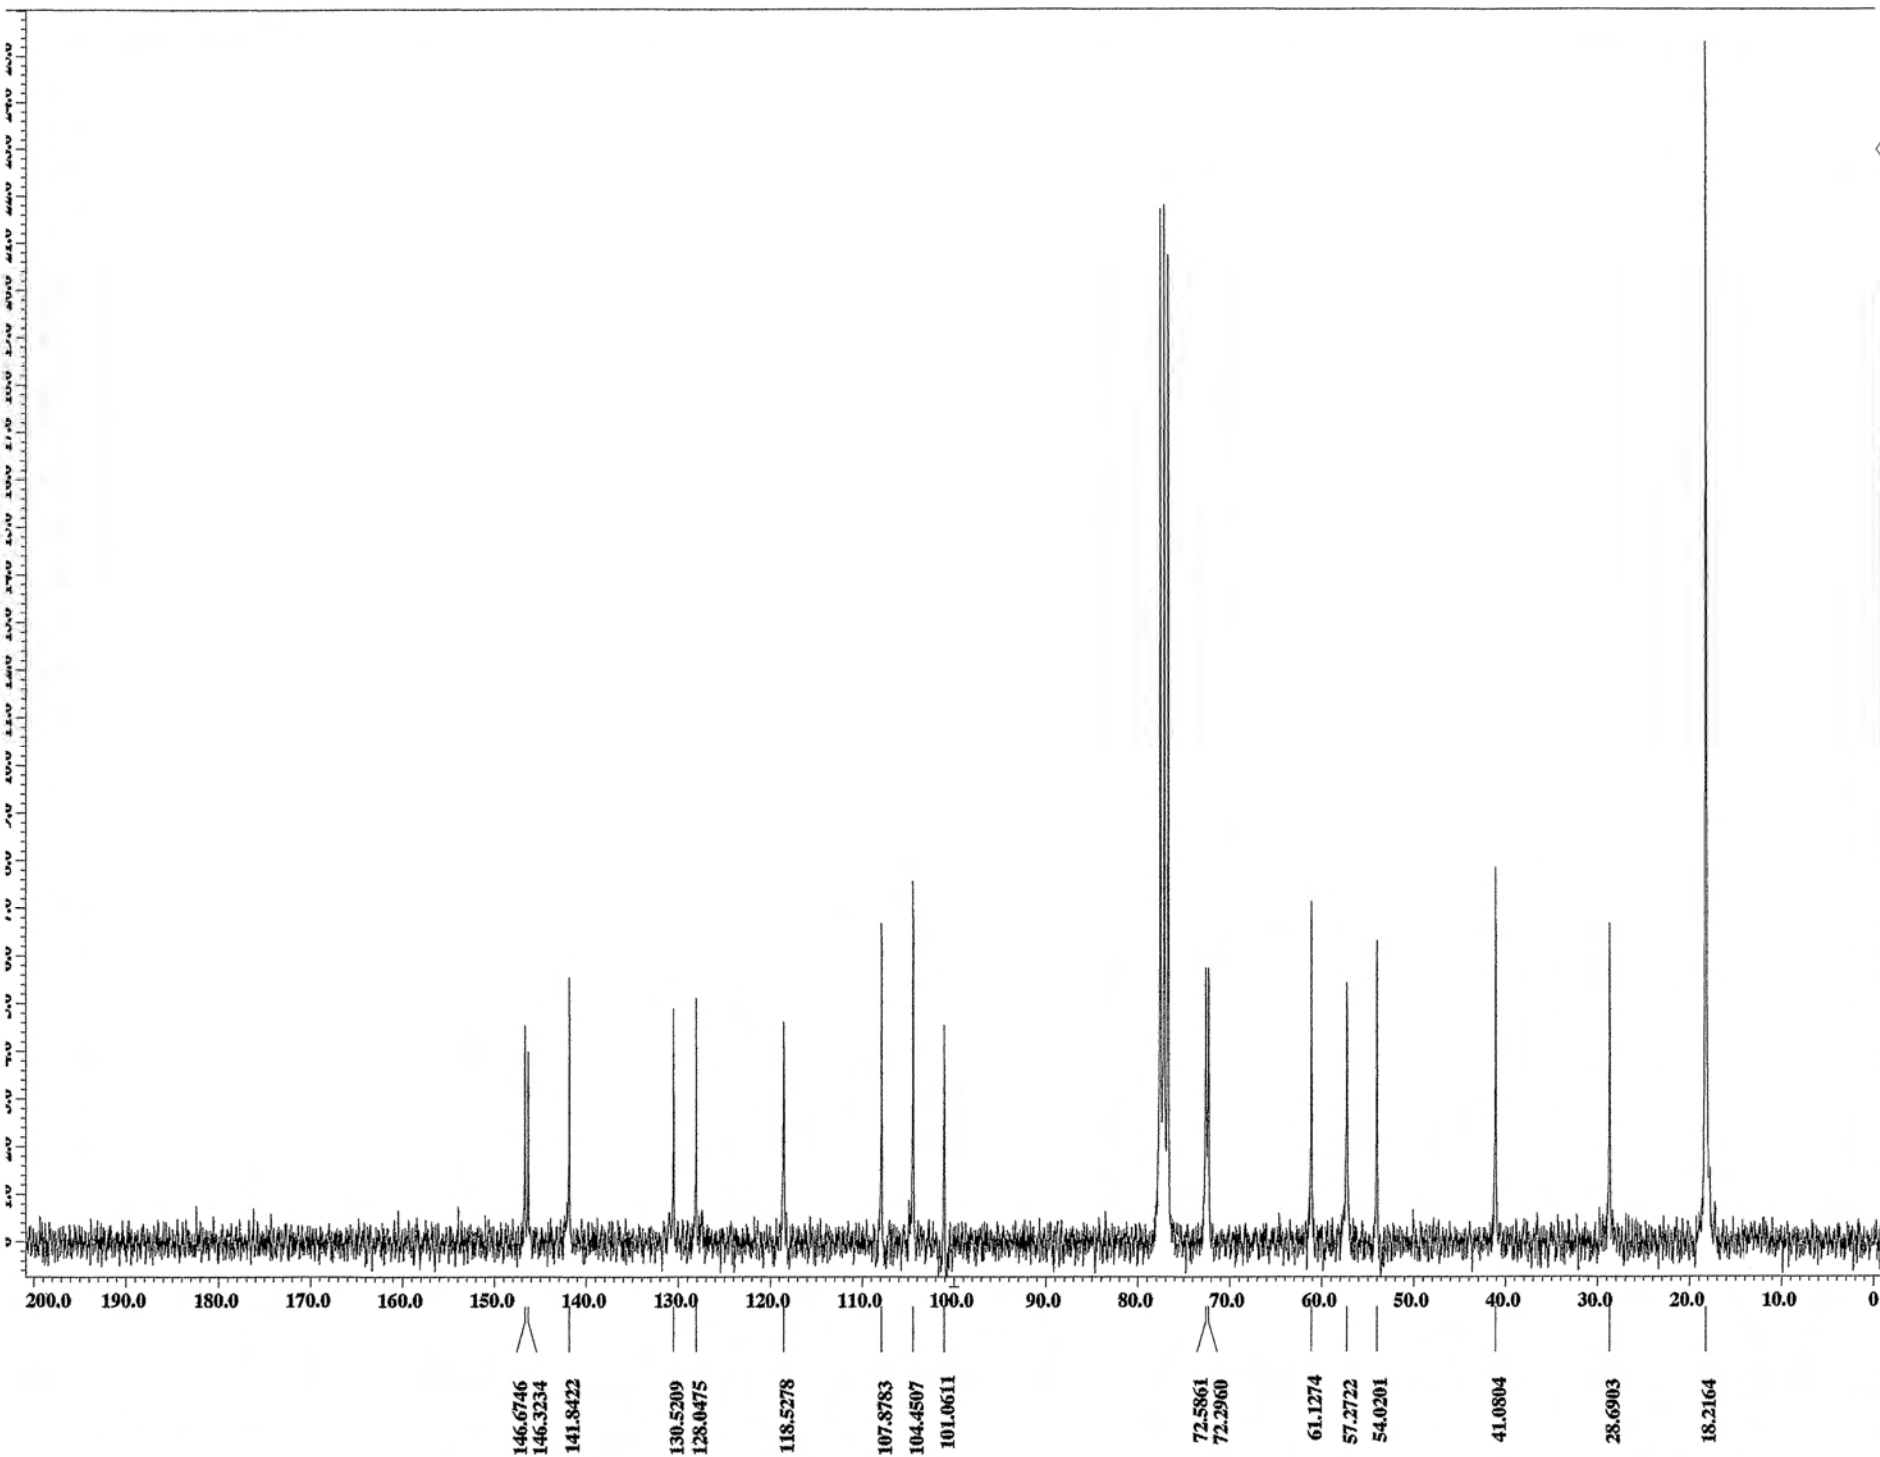

X : parts per Million : <sup>13</sup>C

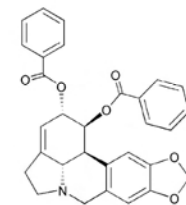

**17**  
<sup>1</sup>H 300 MHz  
 CDCl<sub>3</sub>

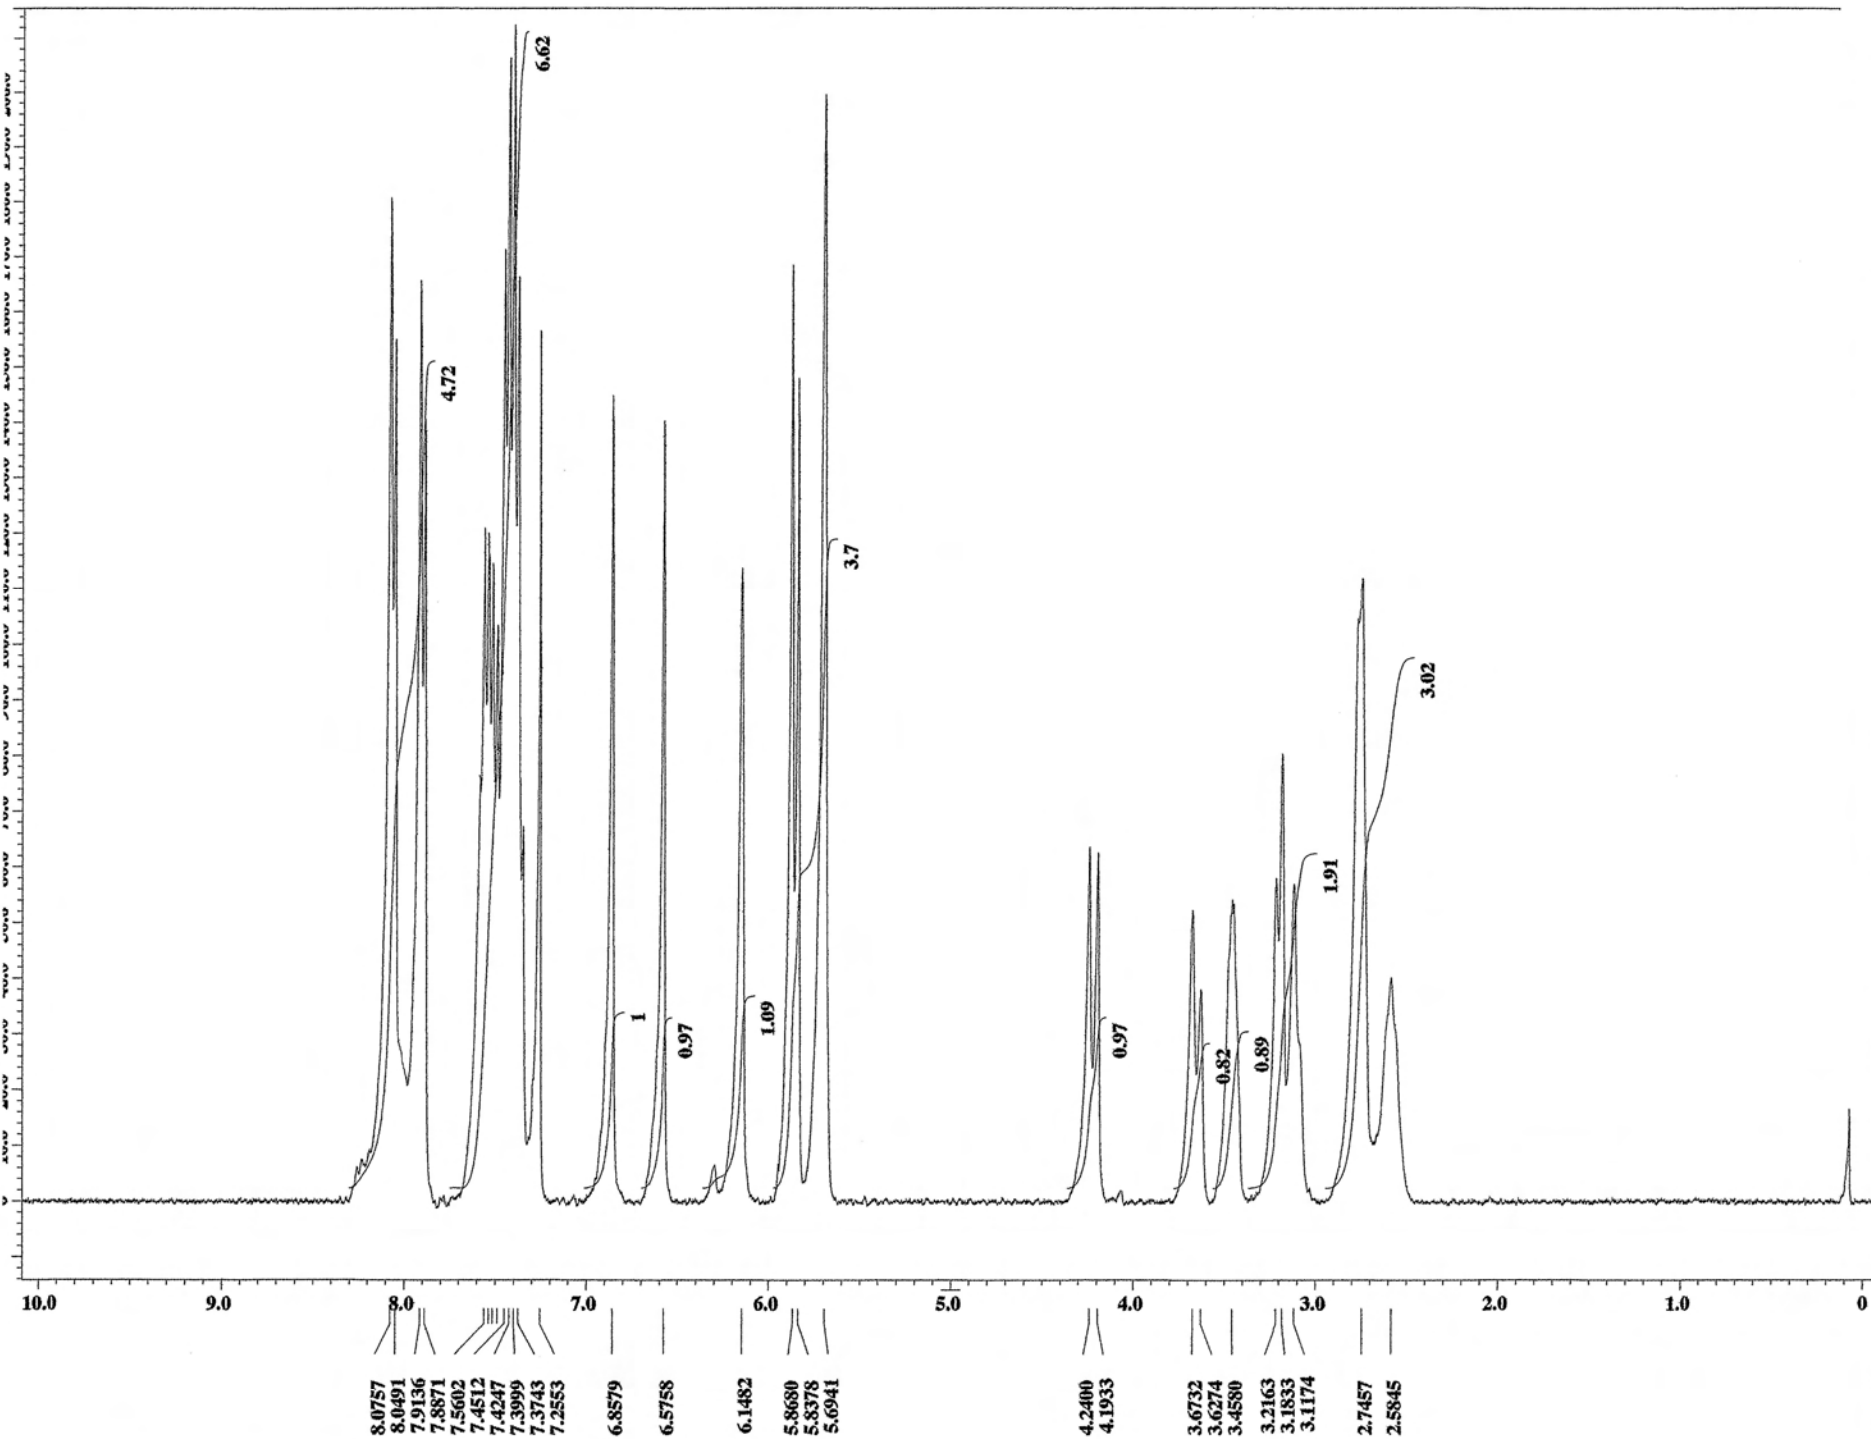

X : parts per Million : 1H

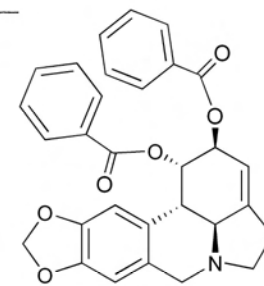

**17**  
<sup>13</sup>C 75 MHz  
CDCl<sub>3</sub>

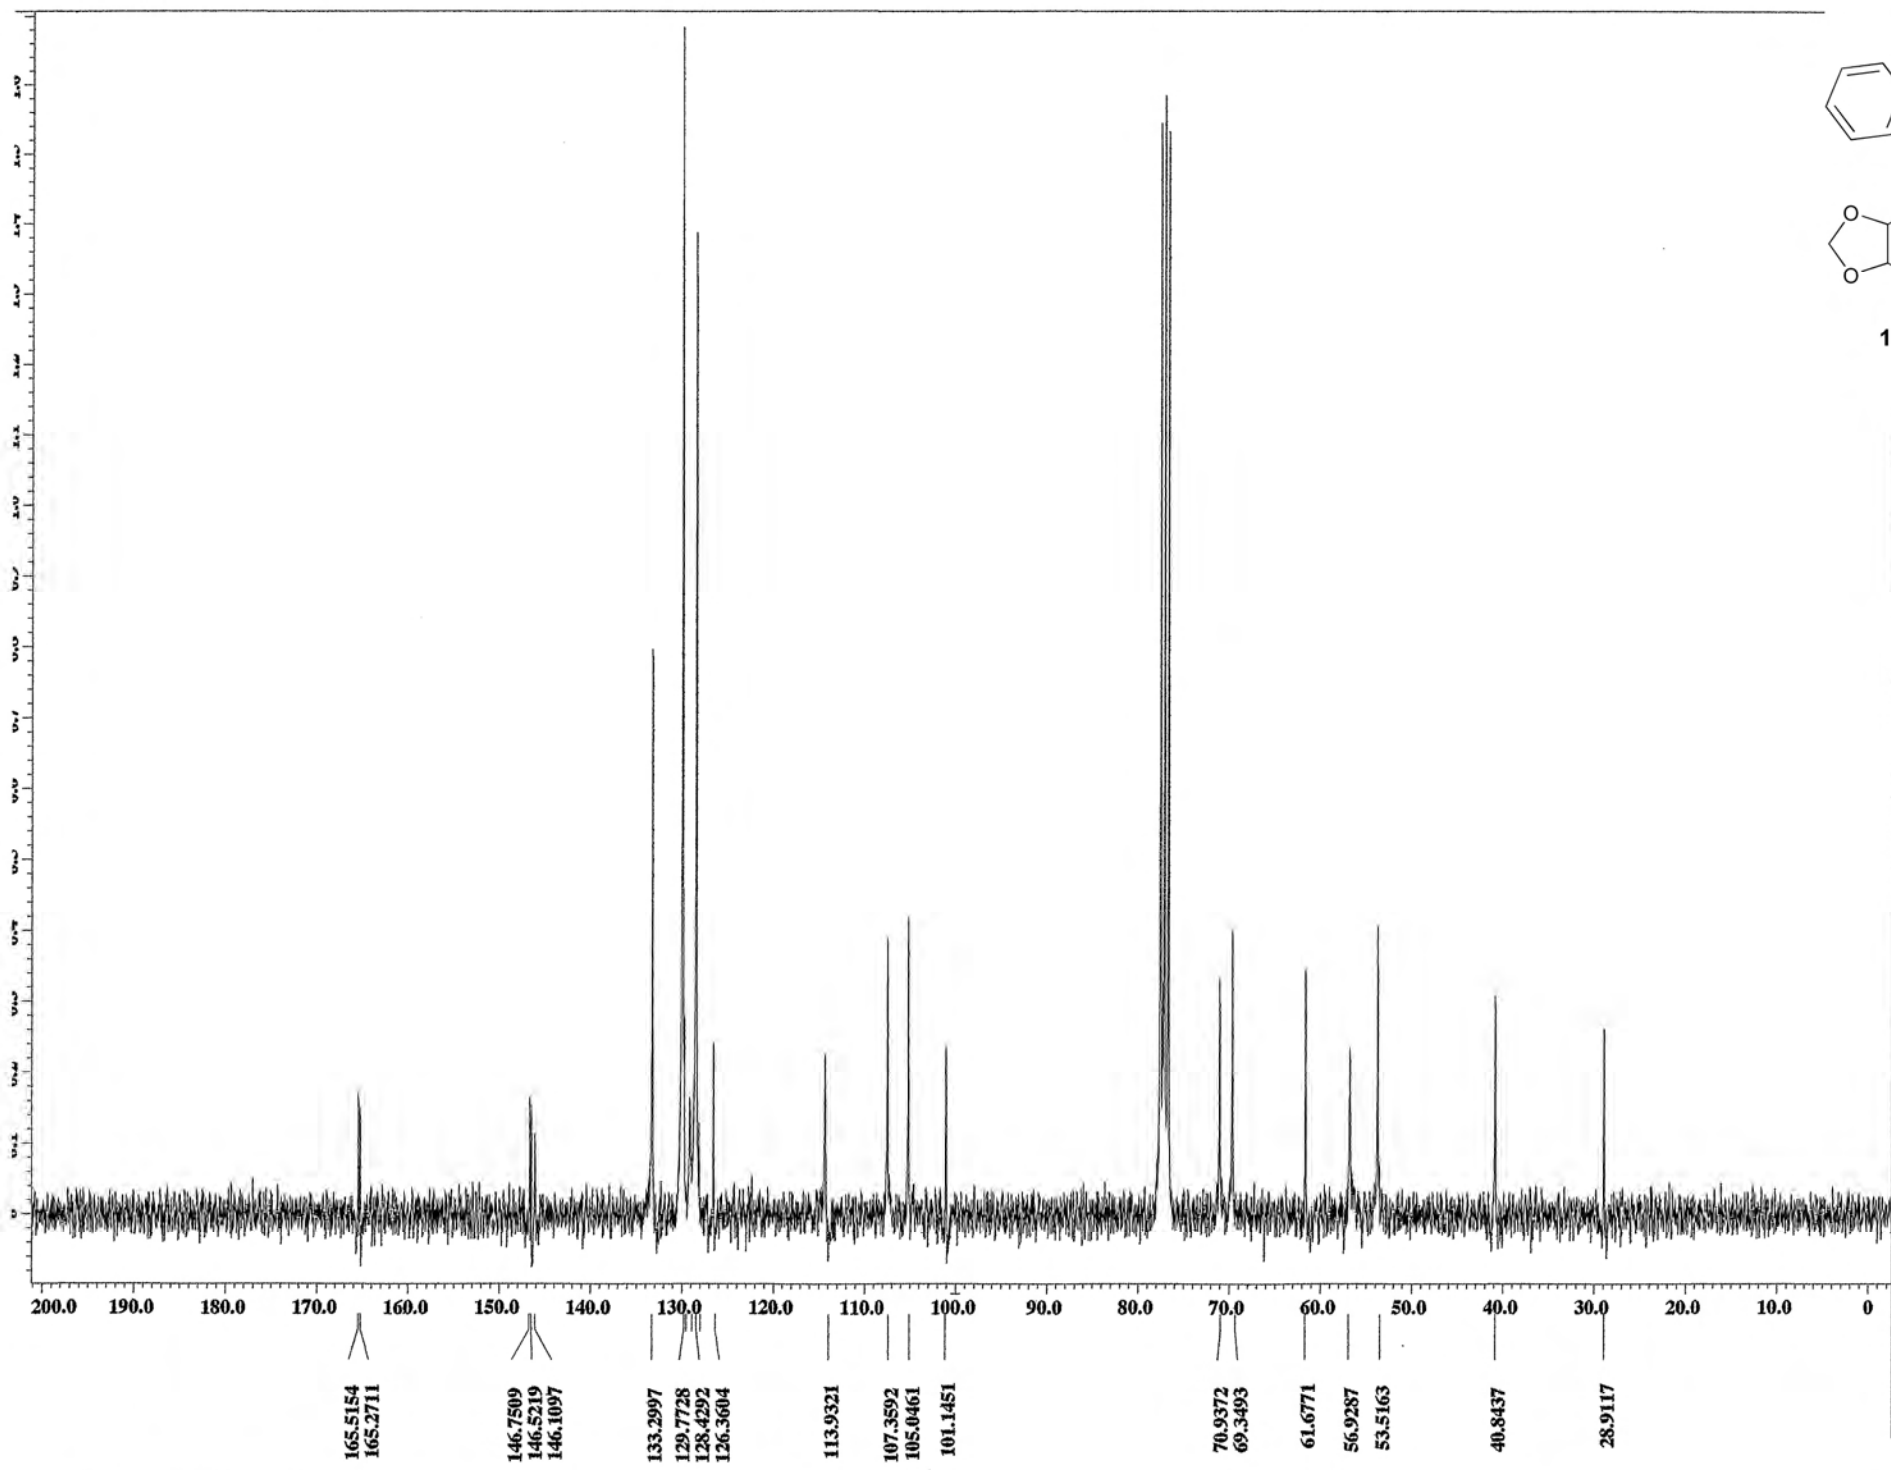

X : parts per Million : 13C

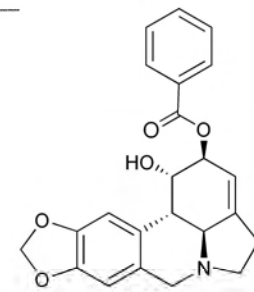

**19**  
 $^1\text{H}$  300 MHz  
 $\text{CDCl}_3$

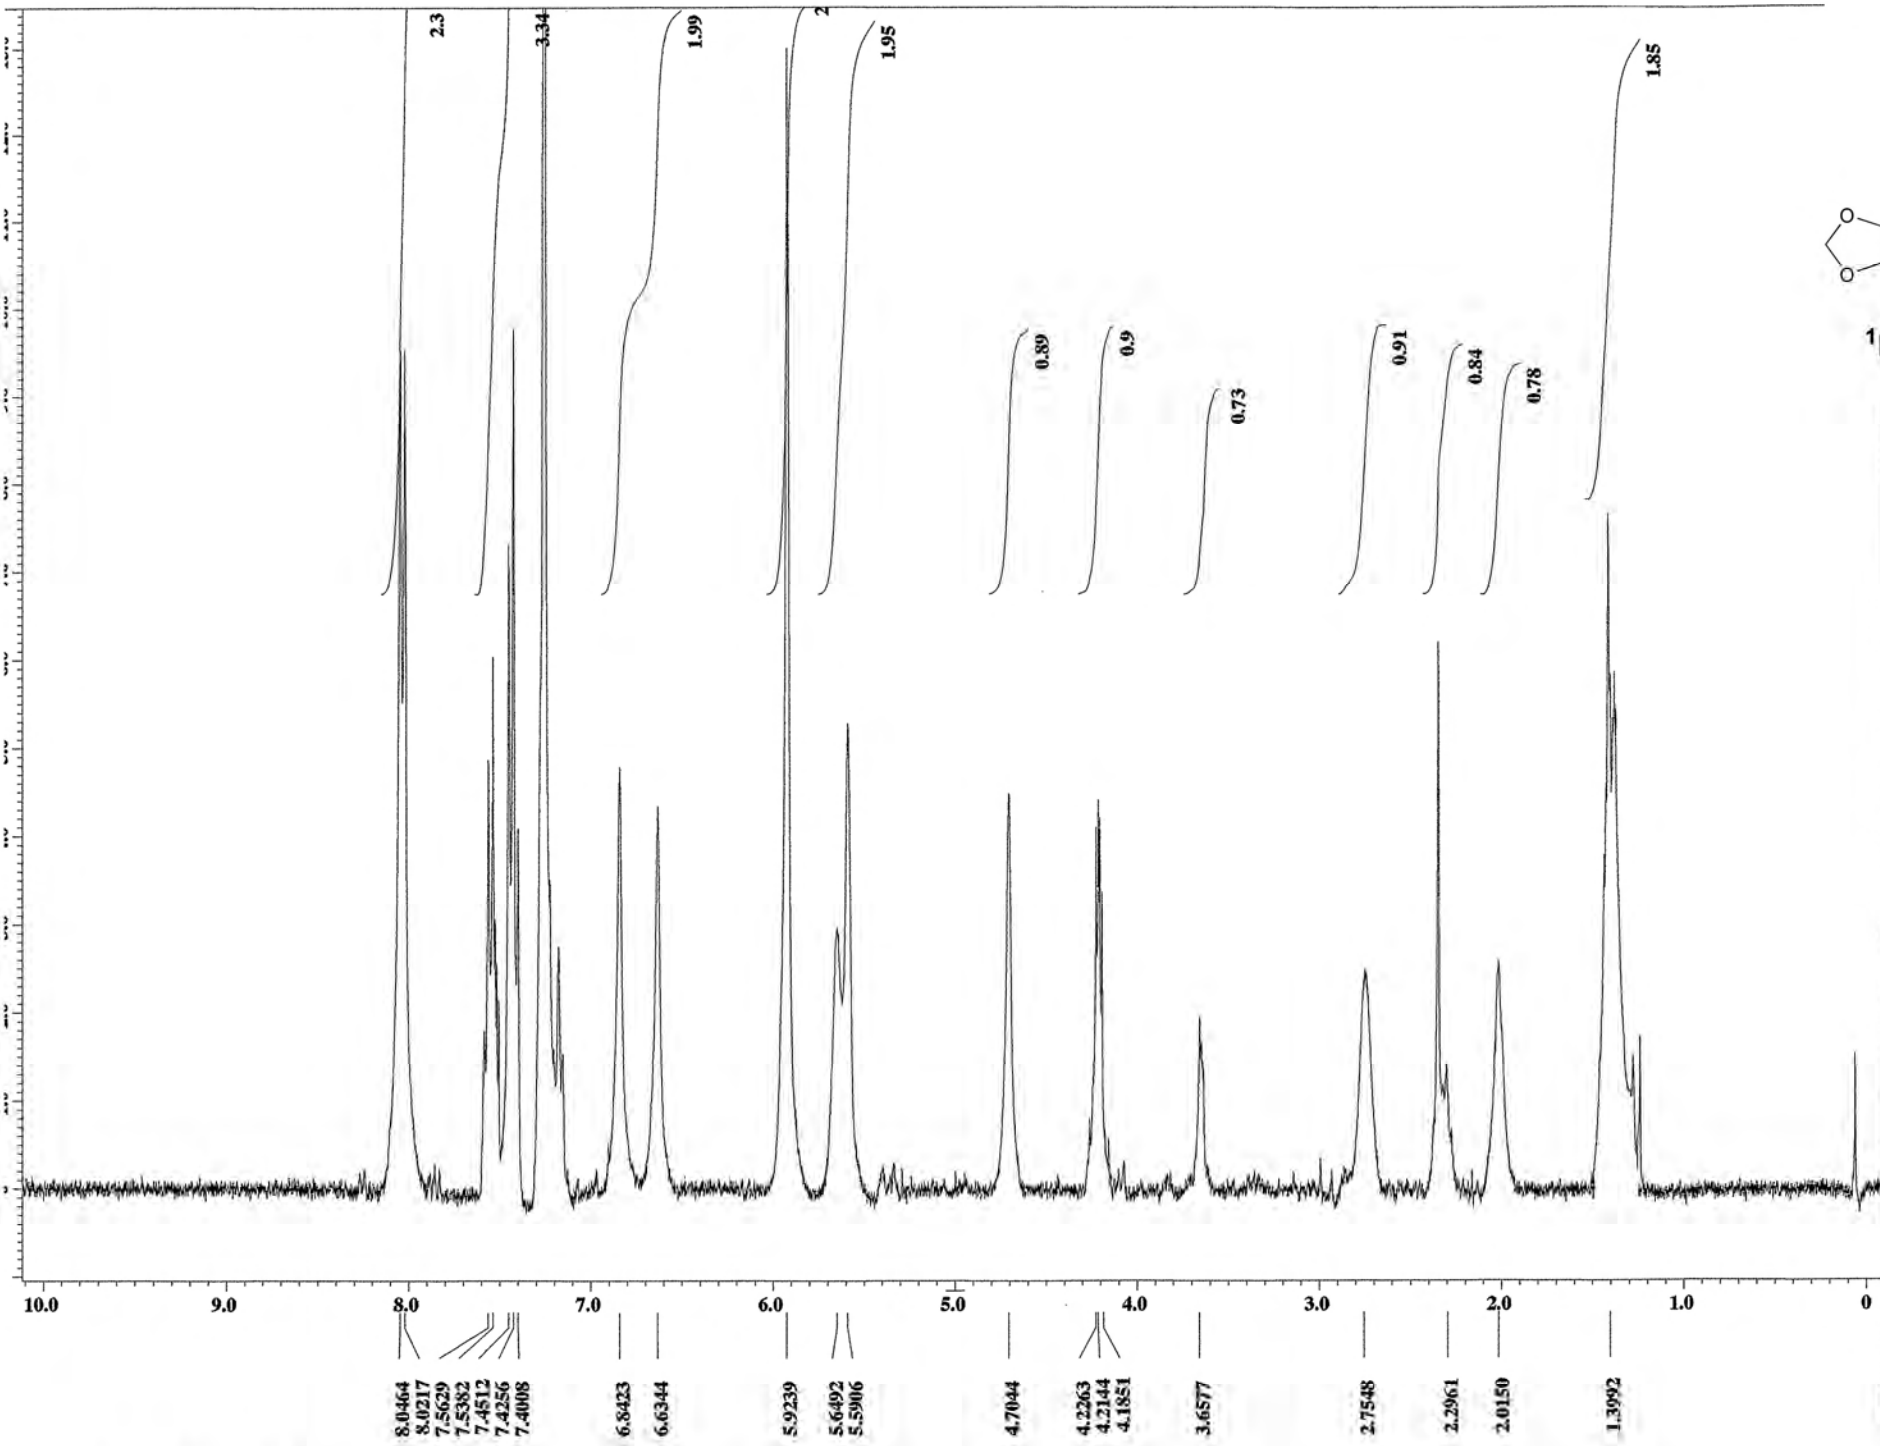

X : parts per Million : 1H



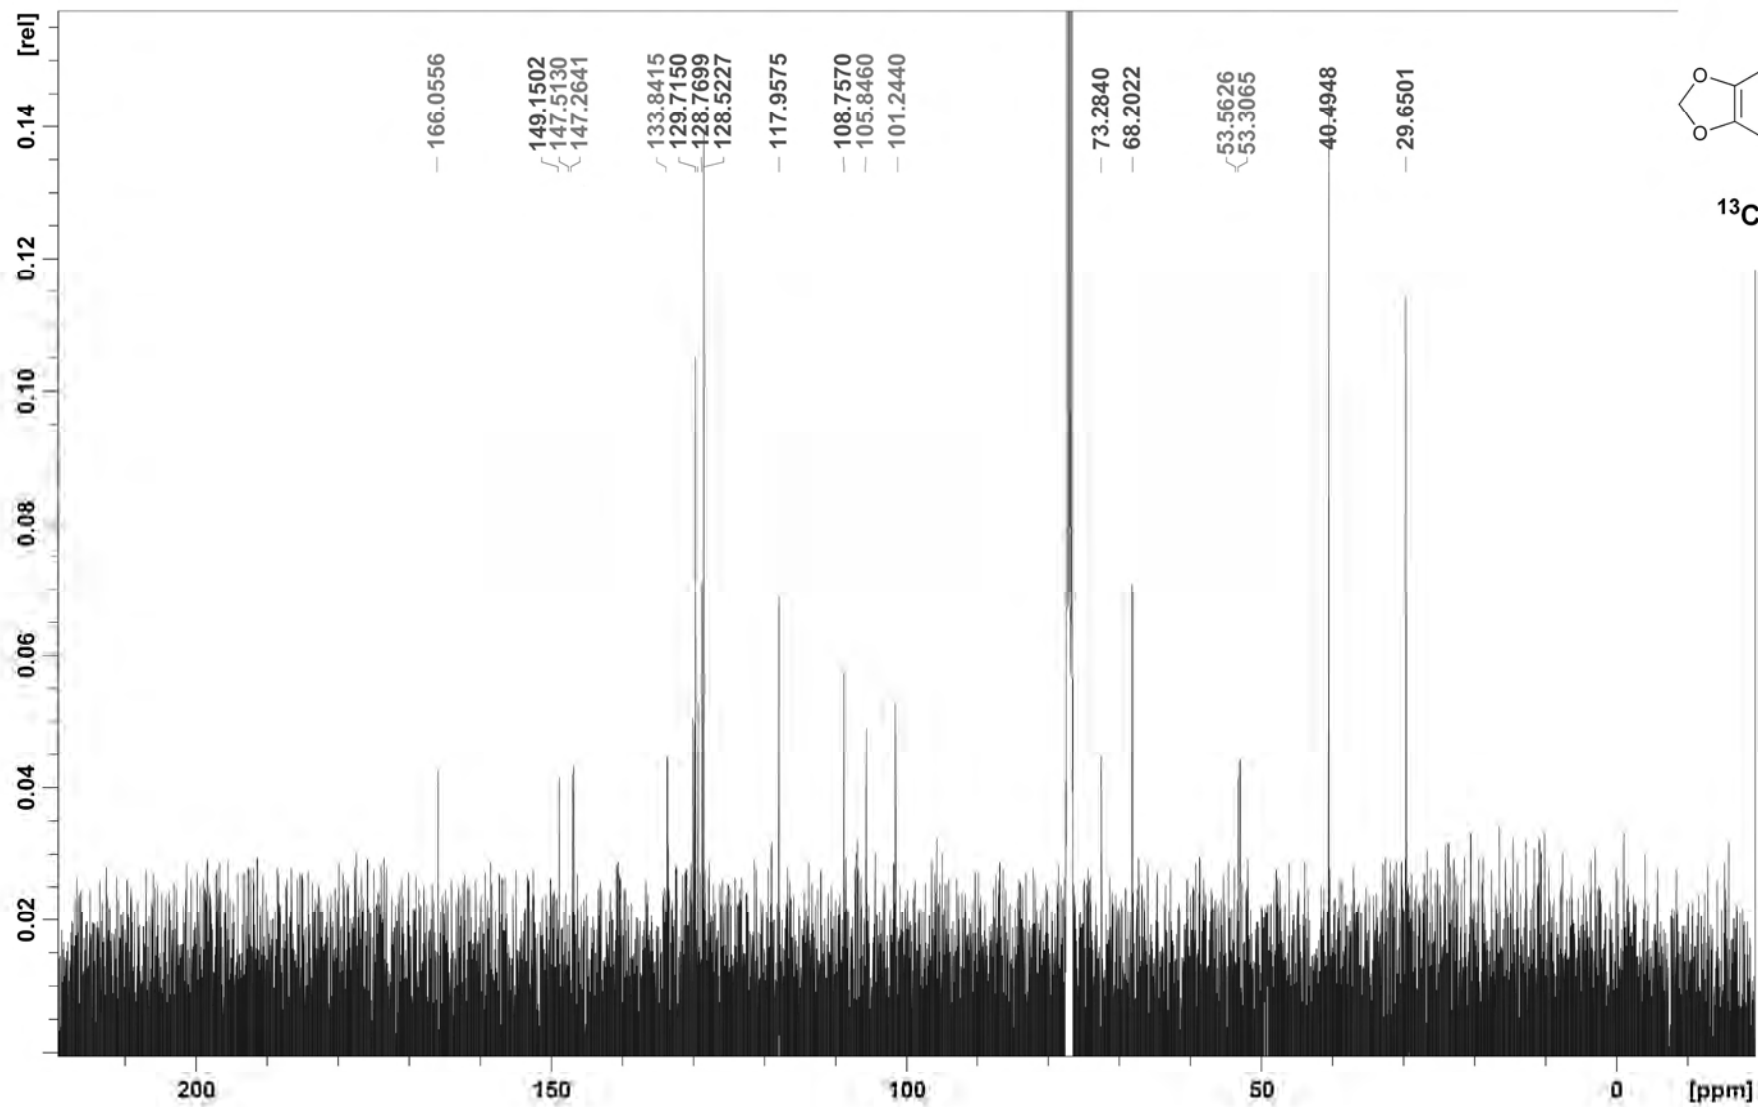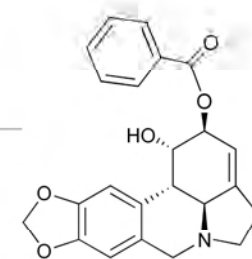

**19**  
<sup>13</sup>C 100 MHz  
CDCl<sub>3</sub>

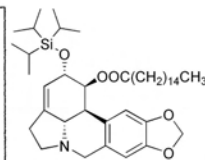

**20**  
<sup>1</sup>H 300 MHz  
 CDCl<sub>3</sub>

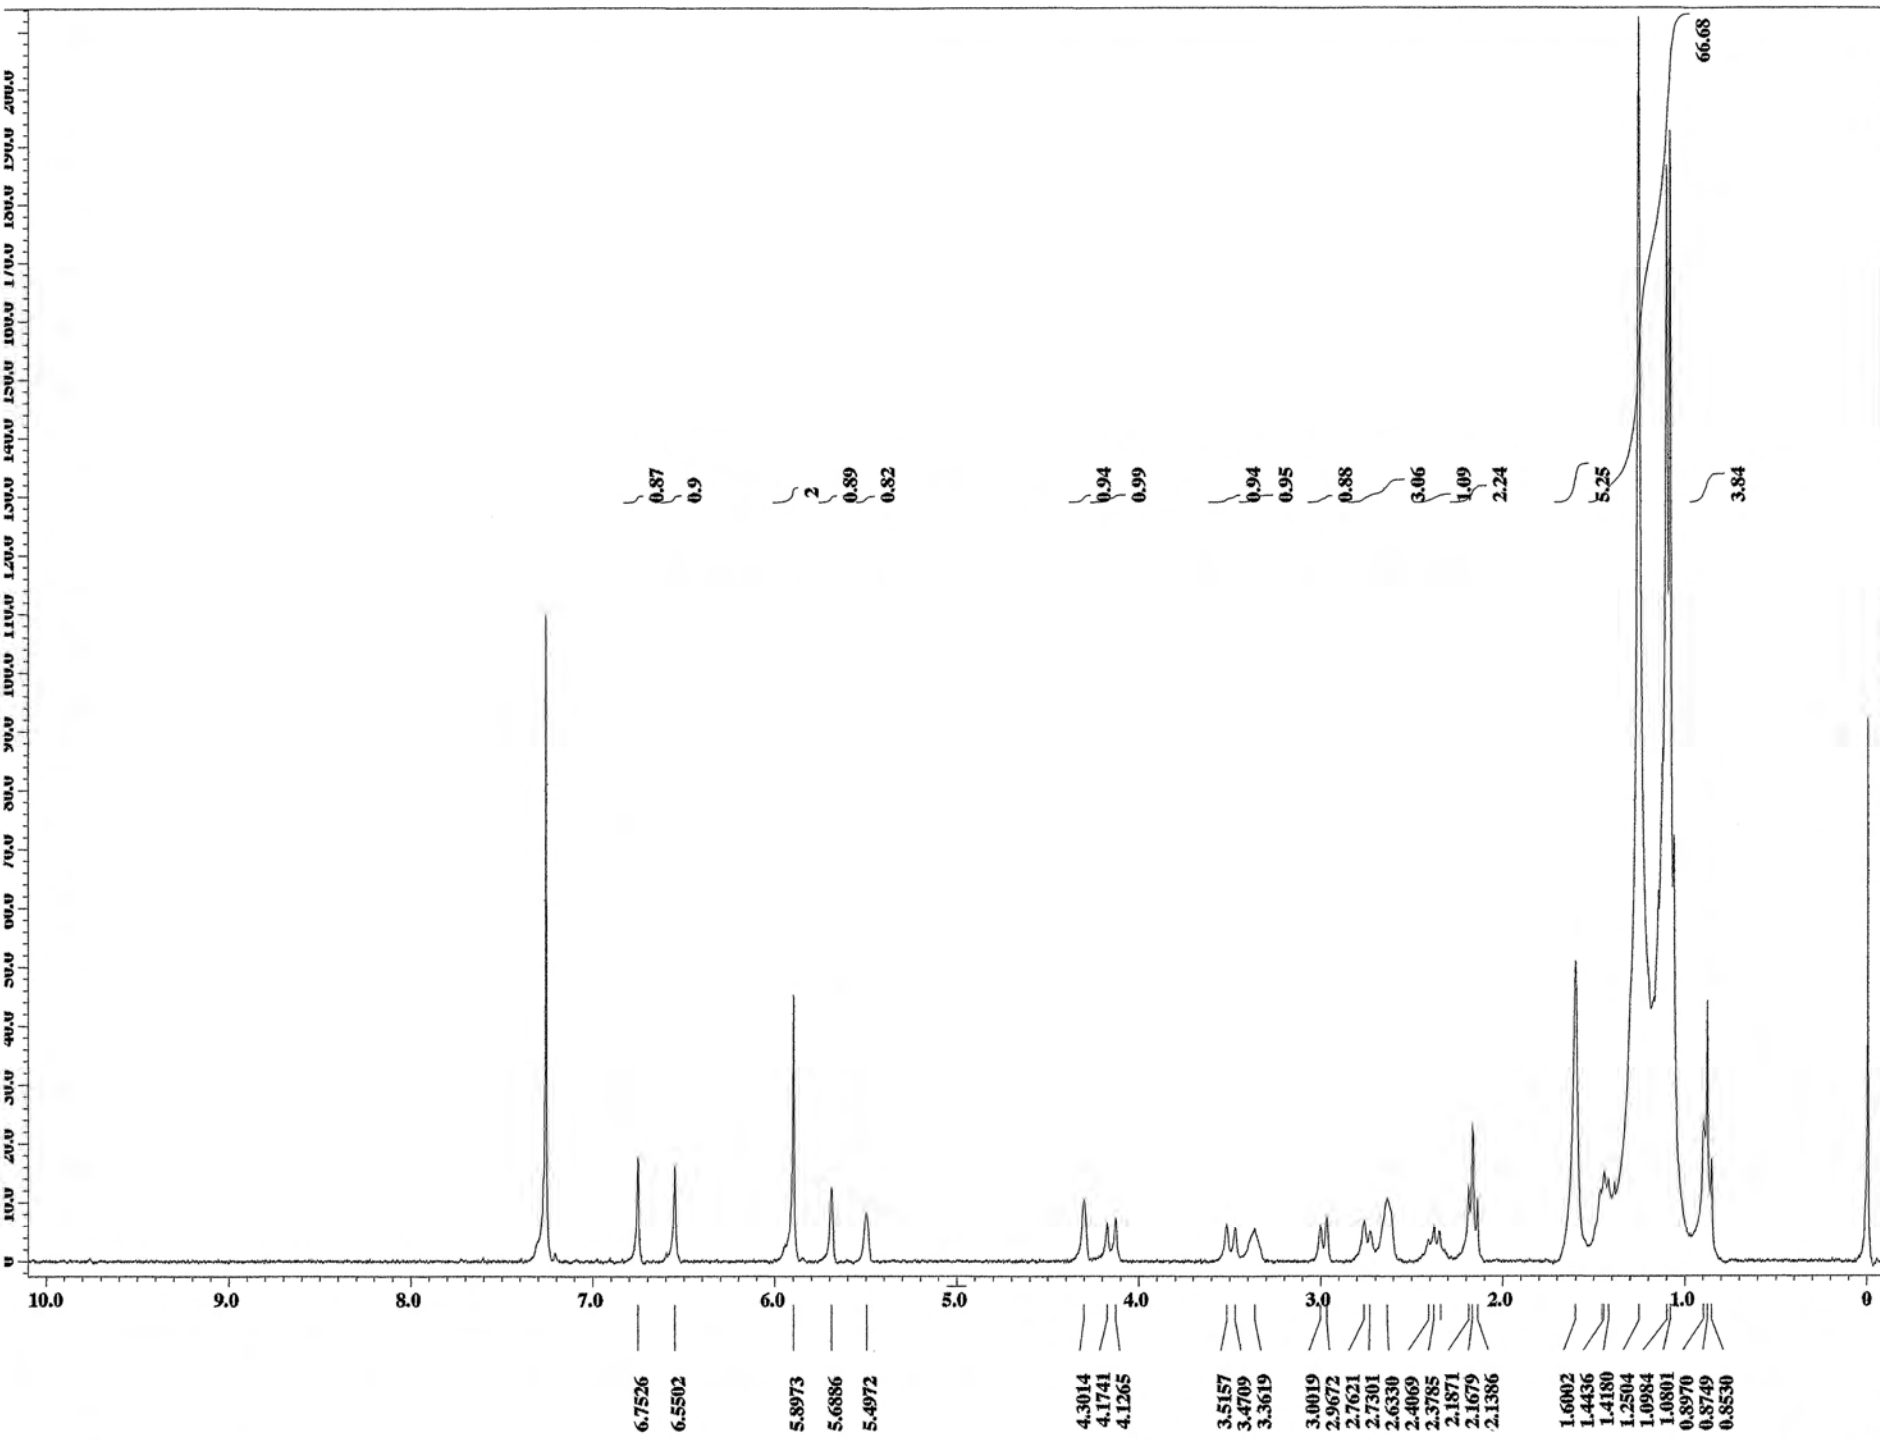

X : parts per Million : 1H

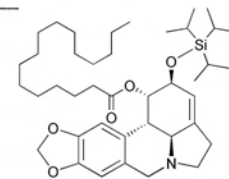

**20**  
<sup>13</sup>C 75 MHz  
CDCl<sub>3</sub>

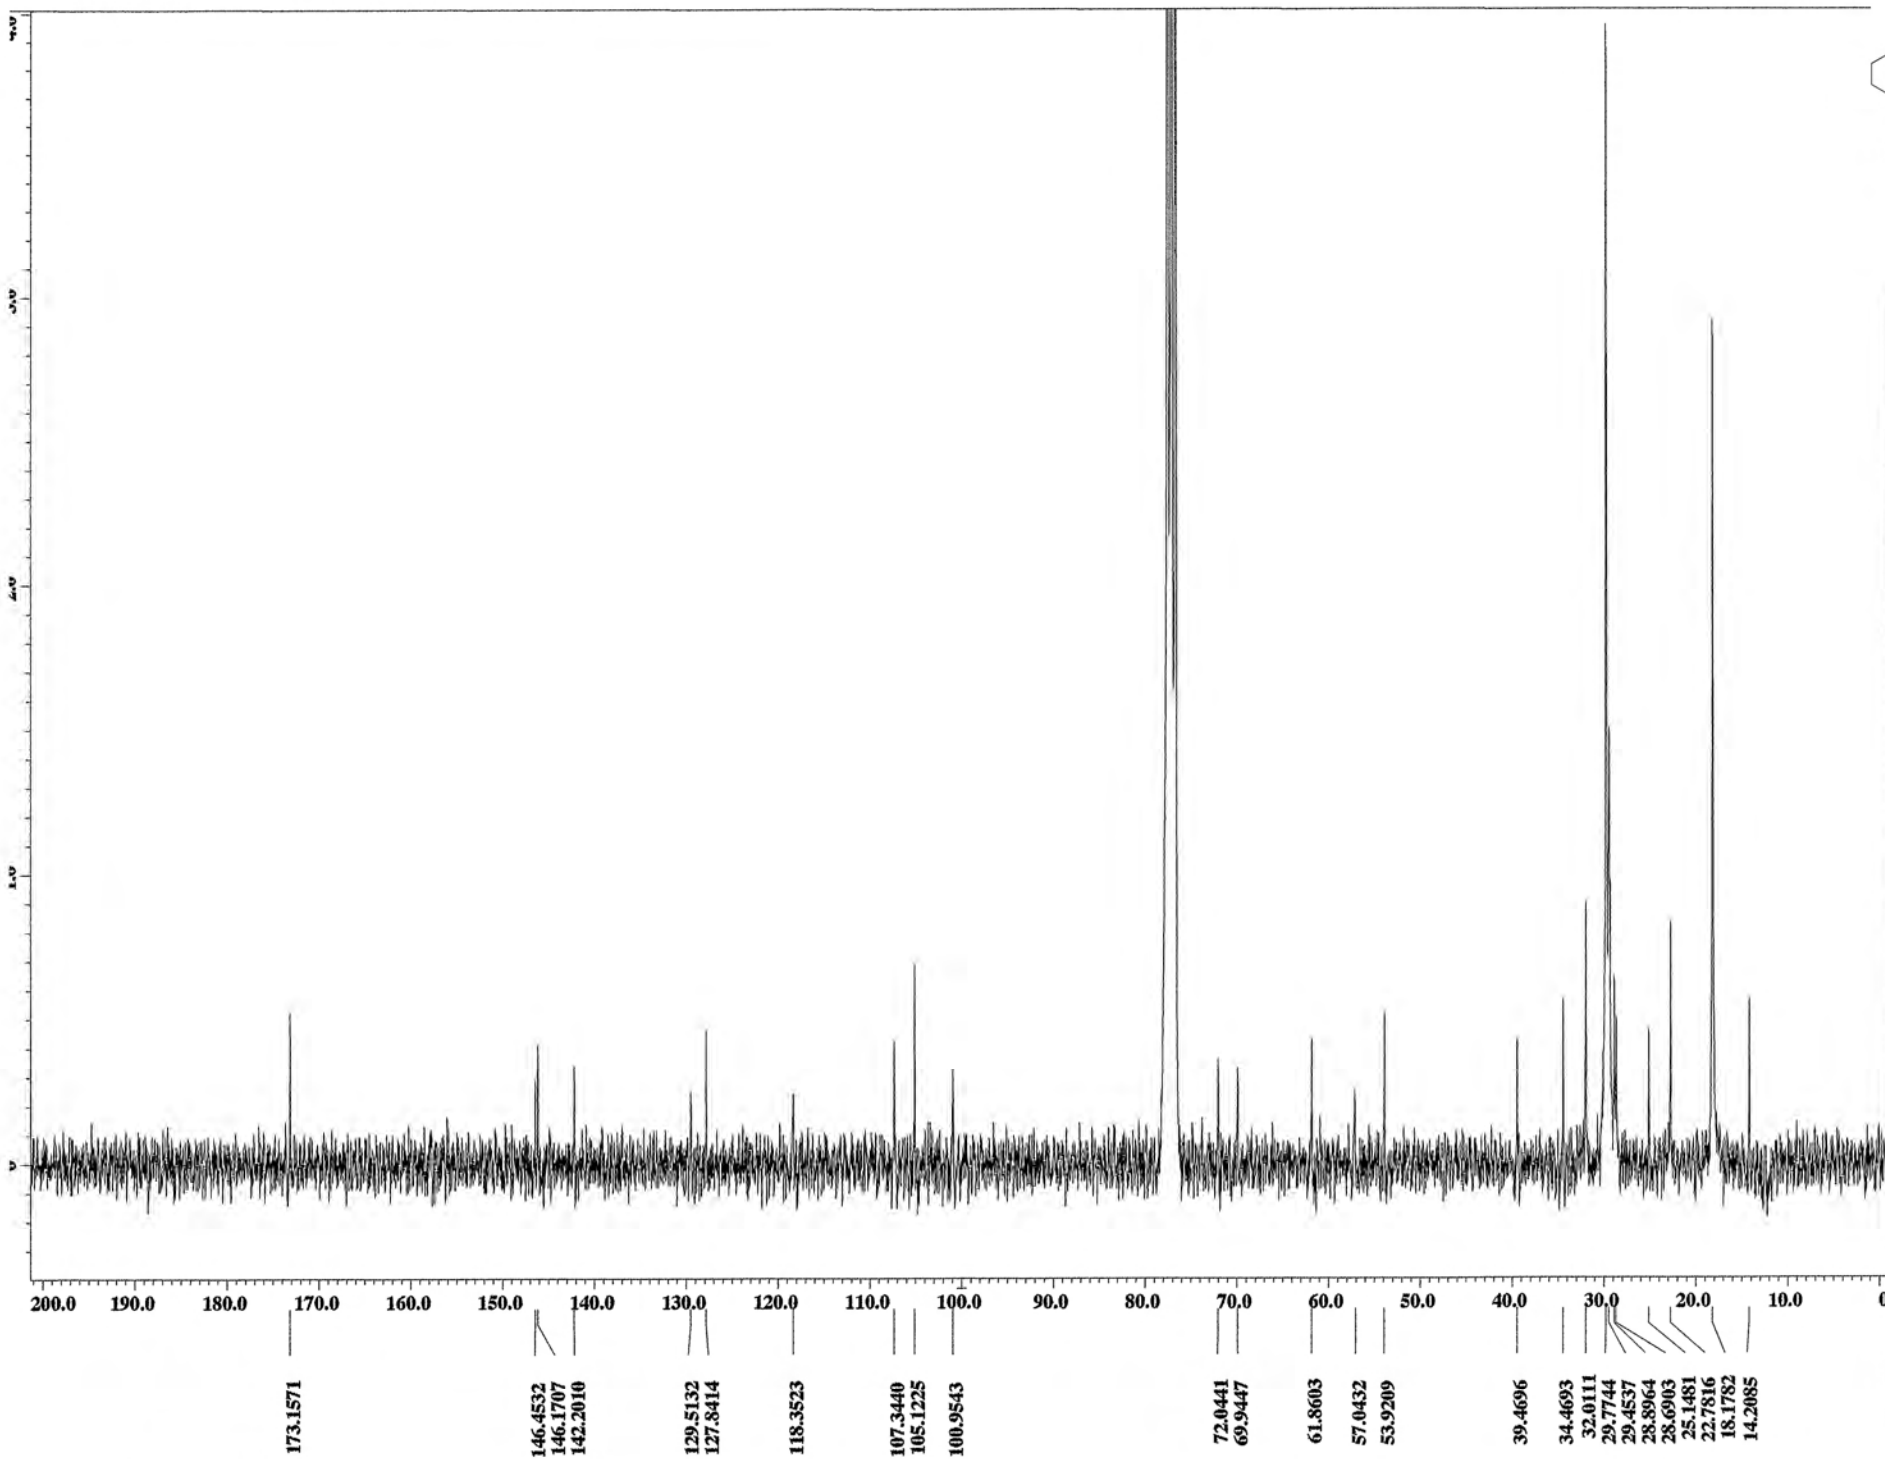

X : parts per Million : <sup>13</sup>C

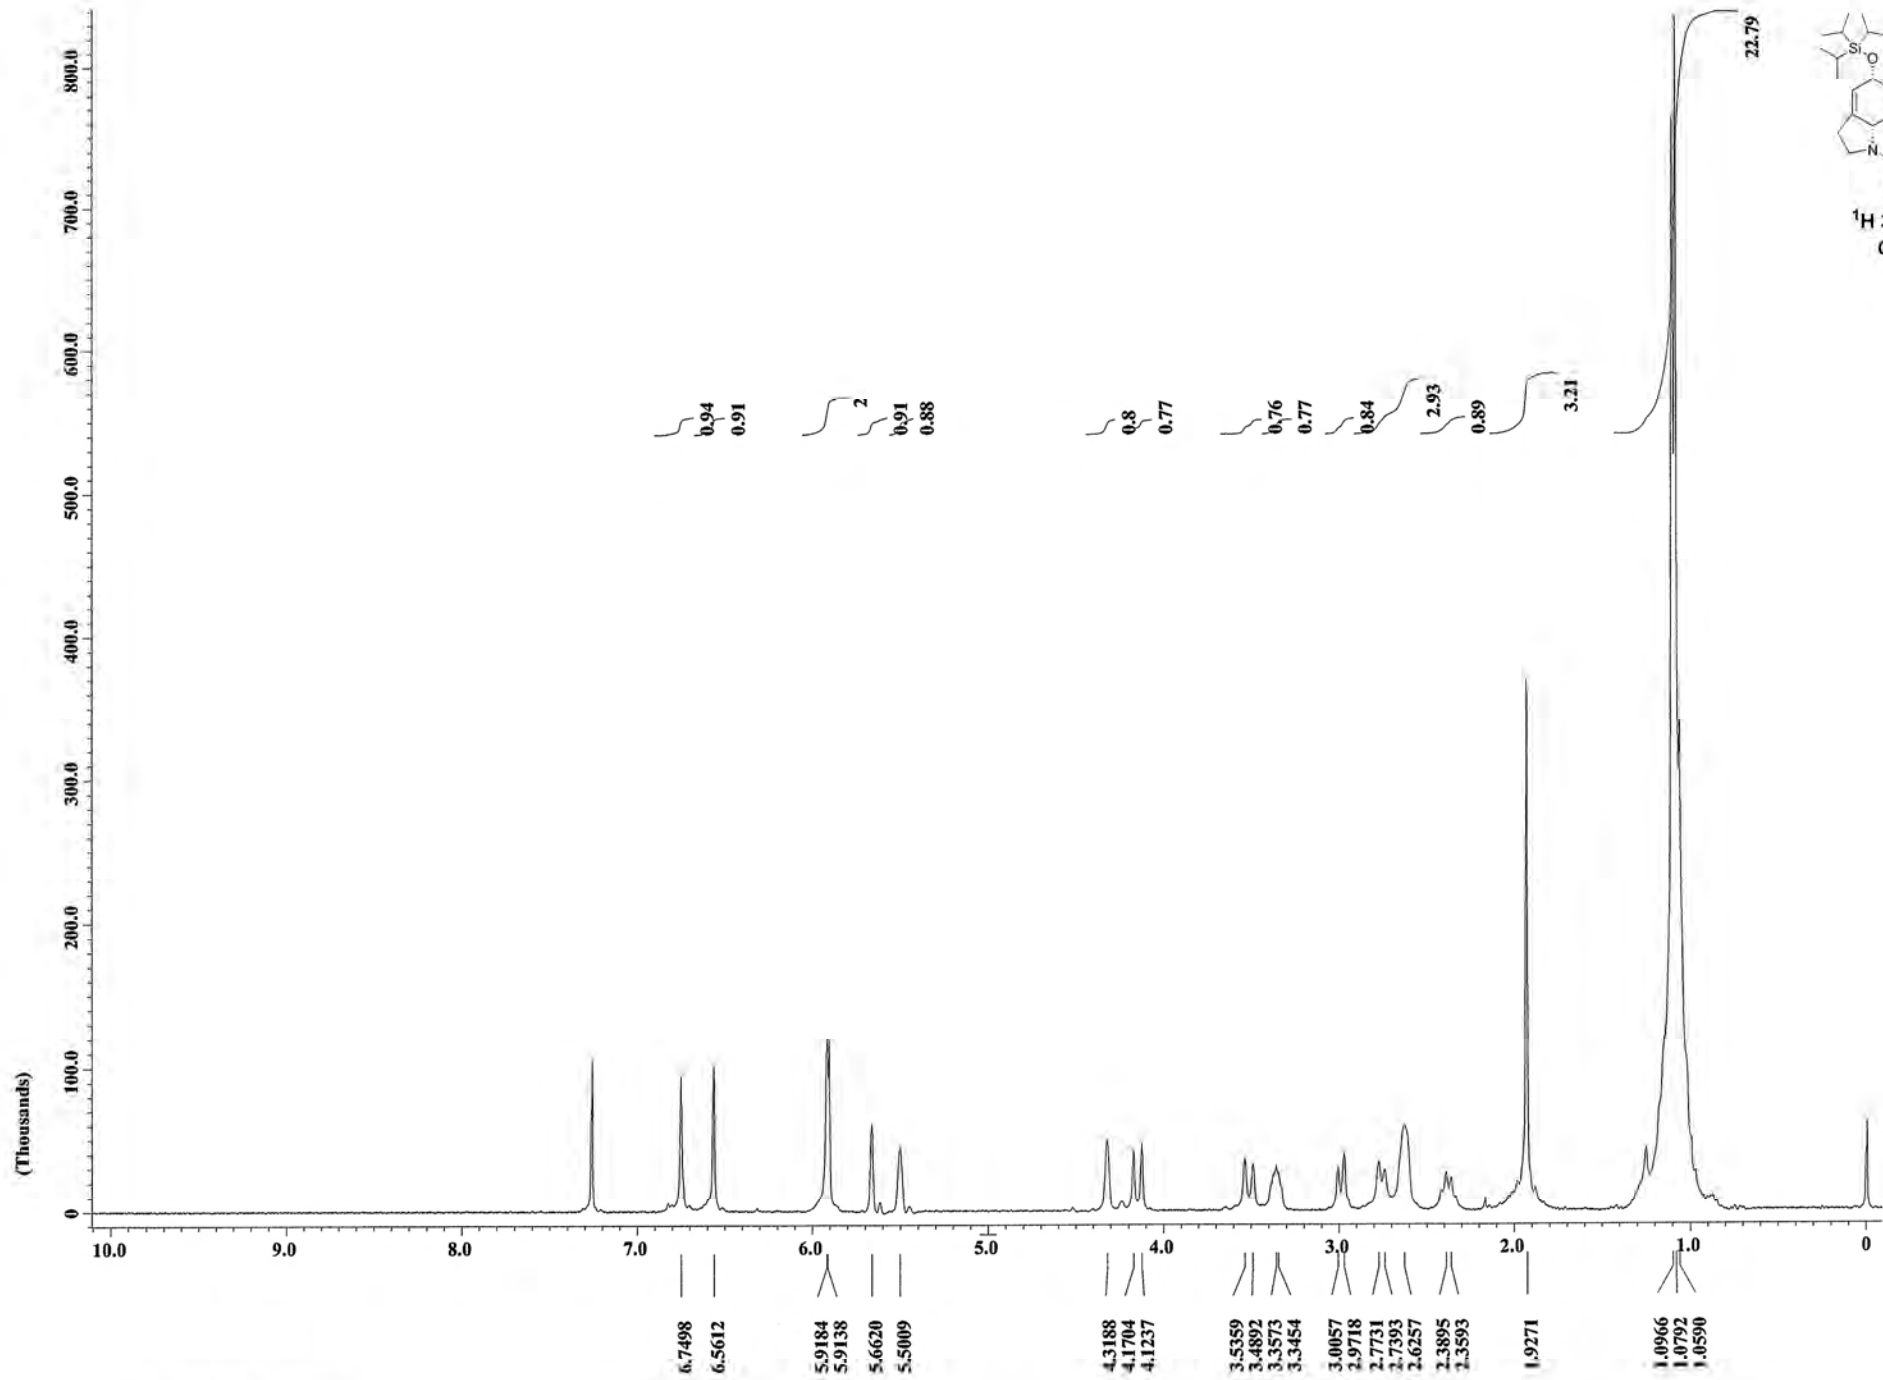

X : parts per Million : 1H

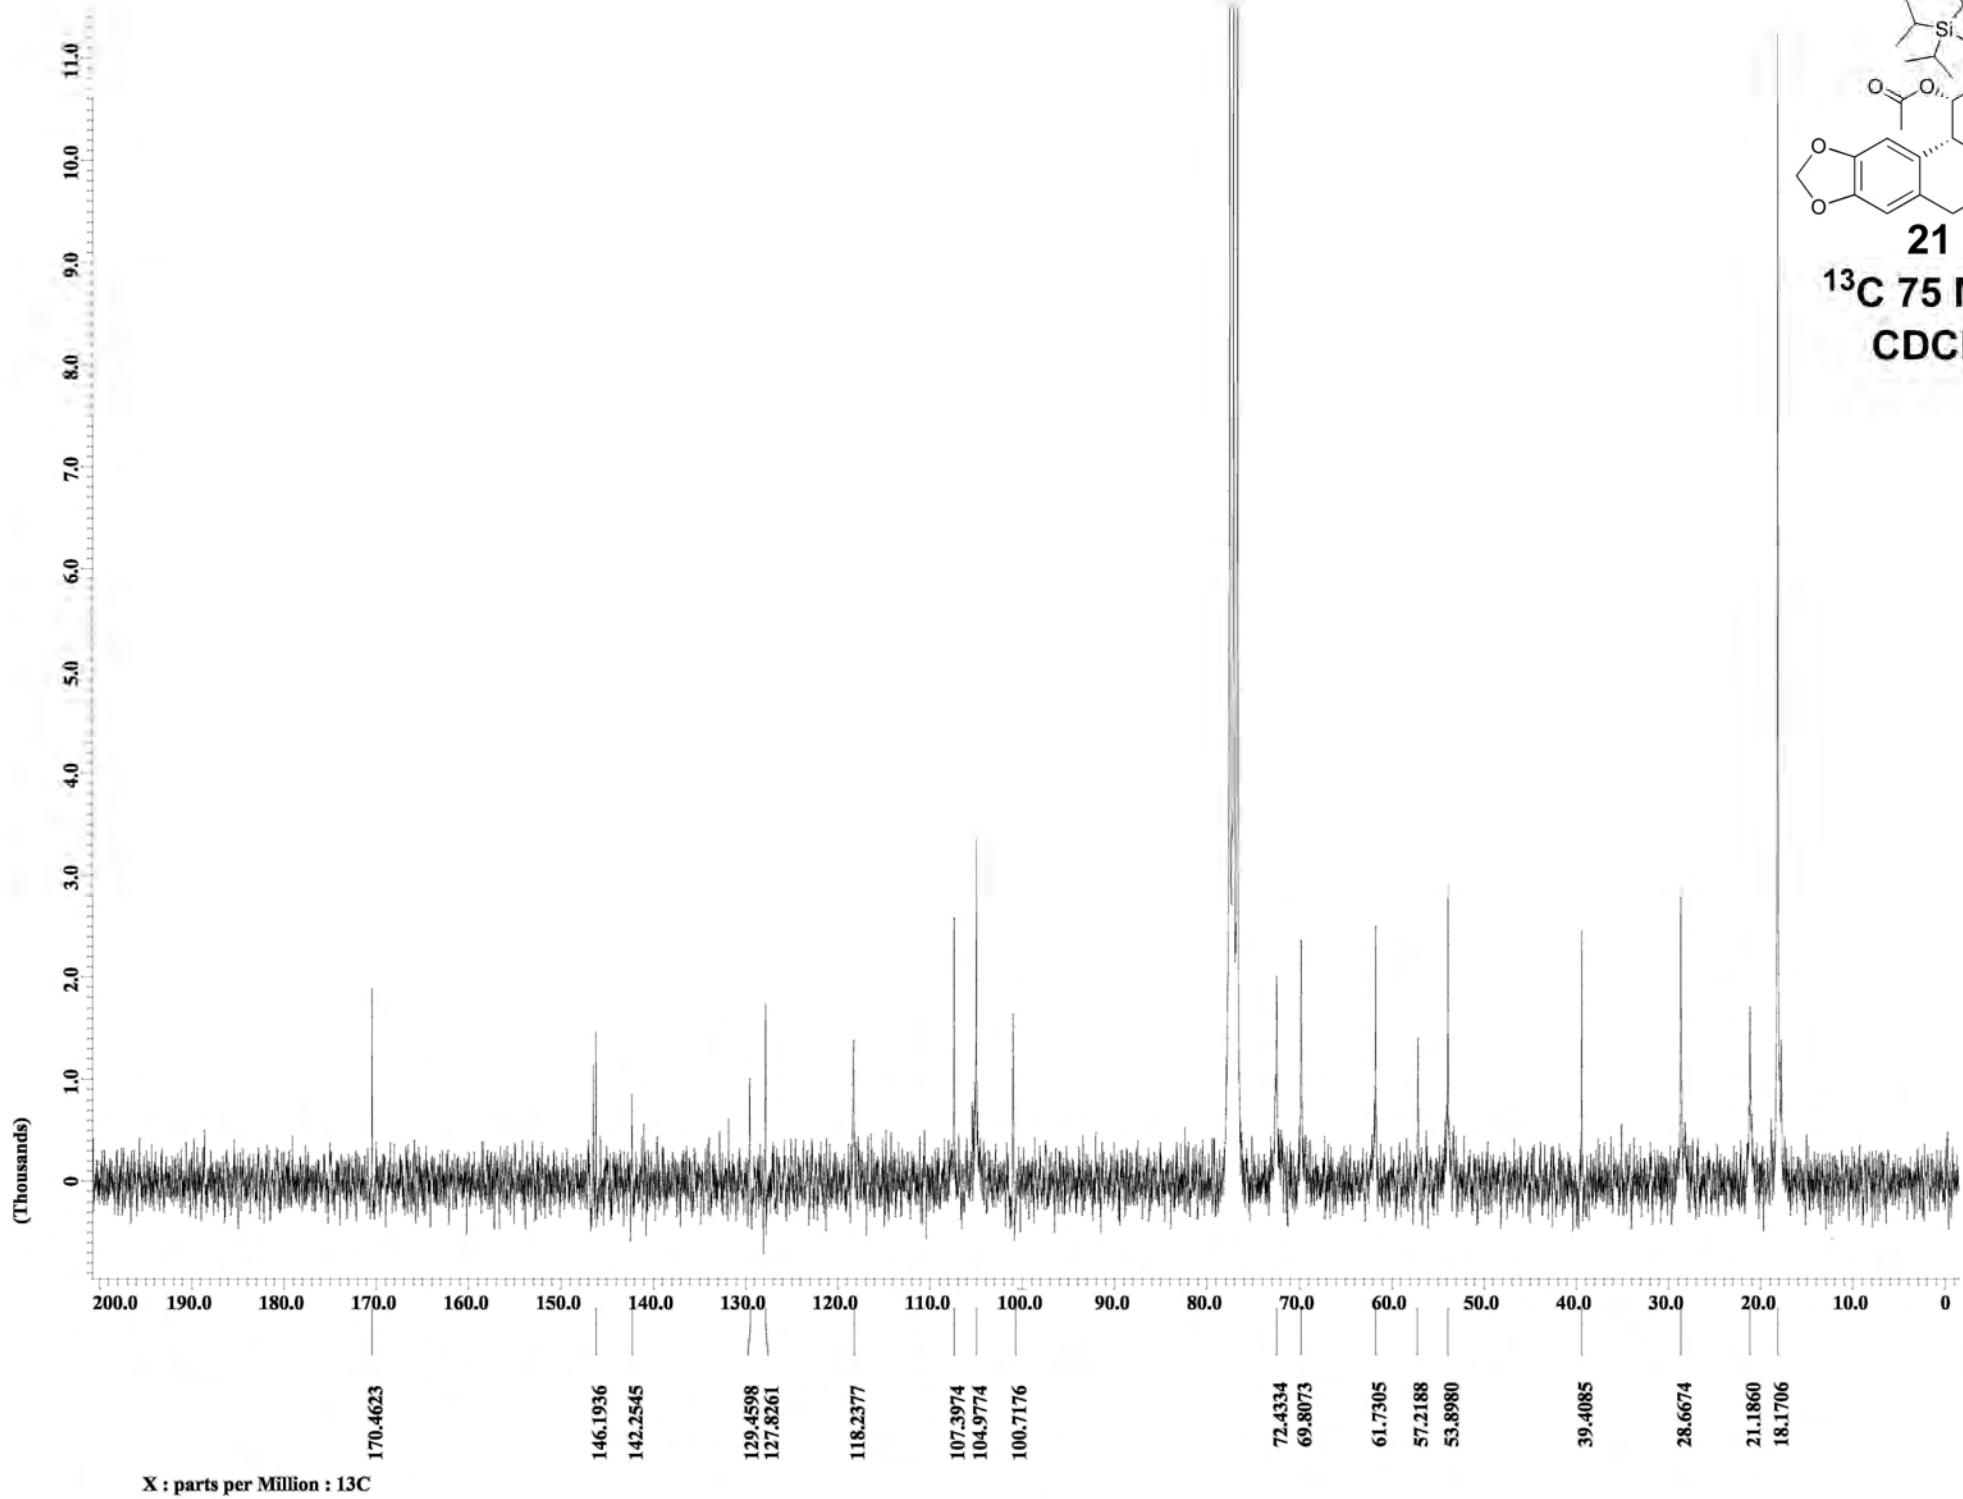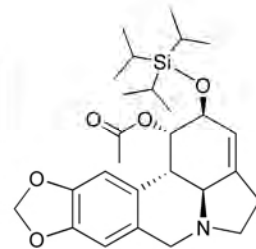

**21**

$^{13}\text{C}$  75 MHz

$\text{CDCl}_3$

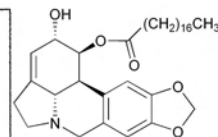

**24**  
 $^1H$  300 MHz  
 $CDCl_3$

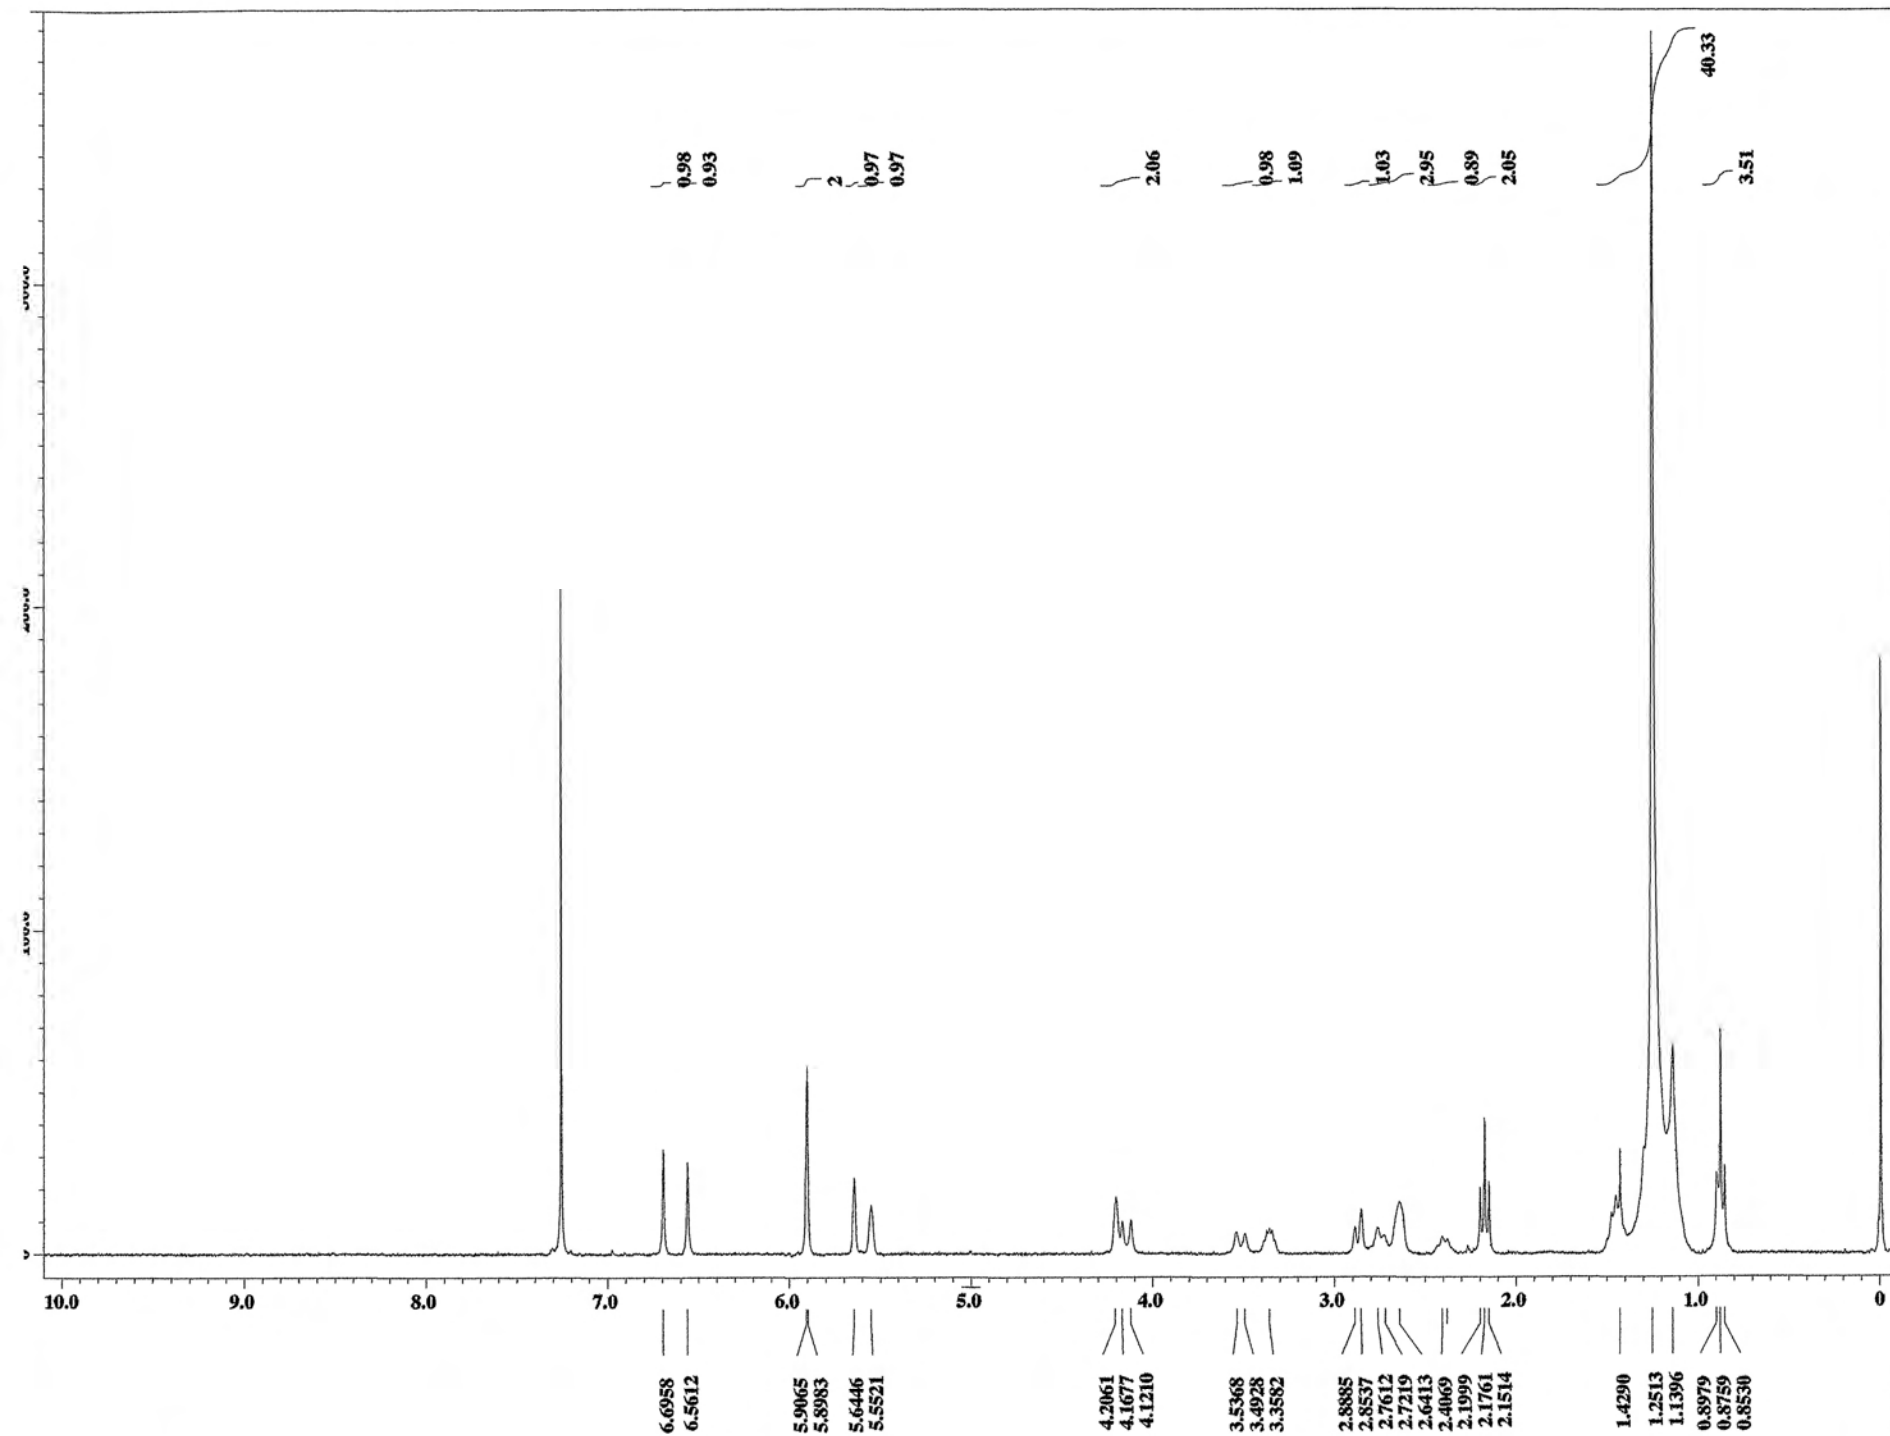

X : parts per Million :  $^1H$

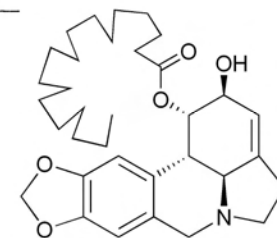

**24**  
<sup>13</sup>C 75 MHz  
CDCl<sub>3</sub>

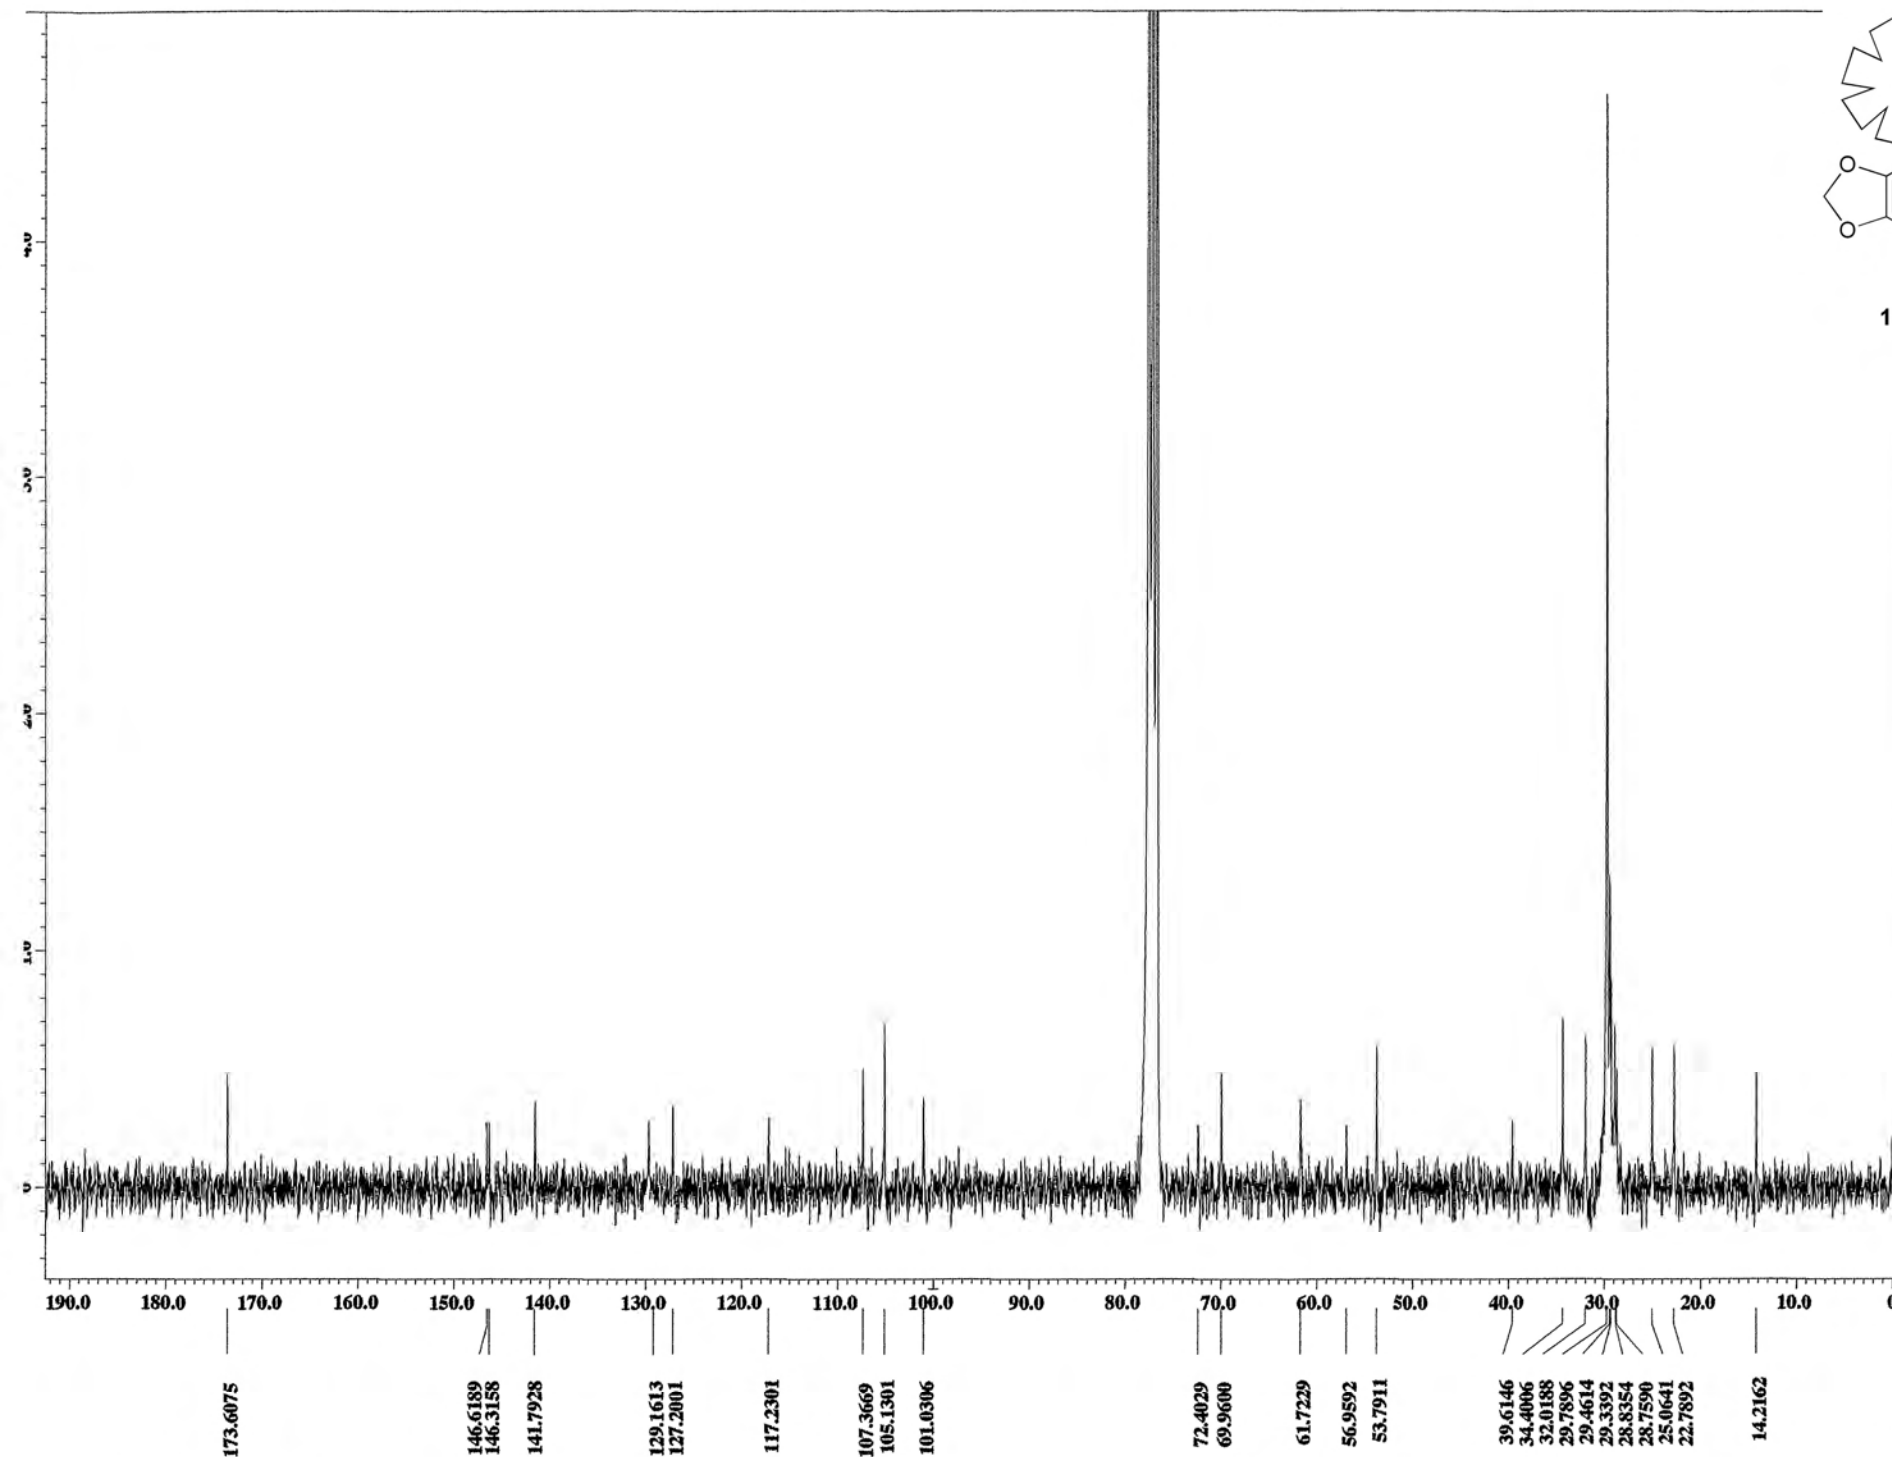

X : parts per Million : <sup>13</sup>C

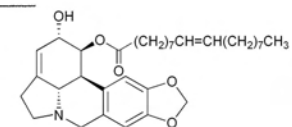

**25**

$^1\text{H}$  300 MHz  
 $\text{CDCl}_3$

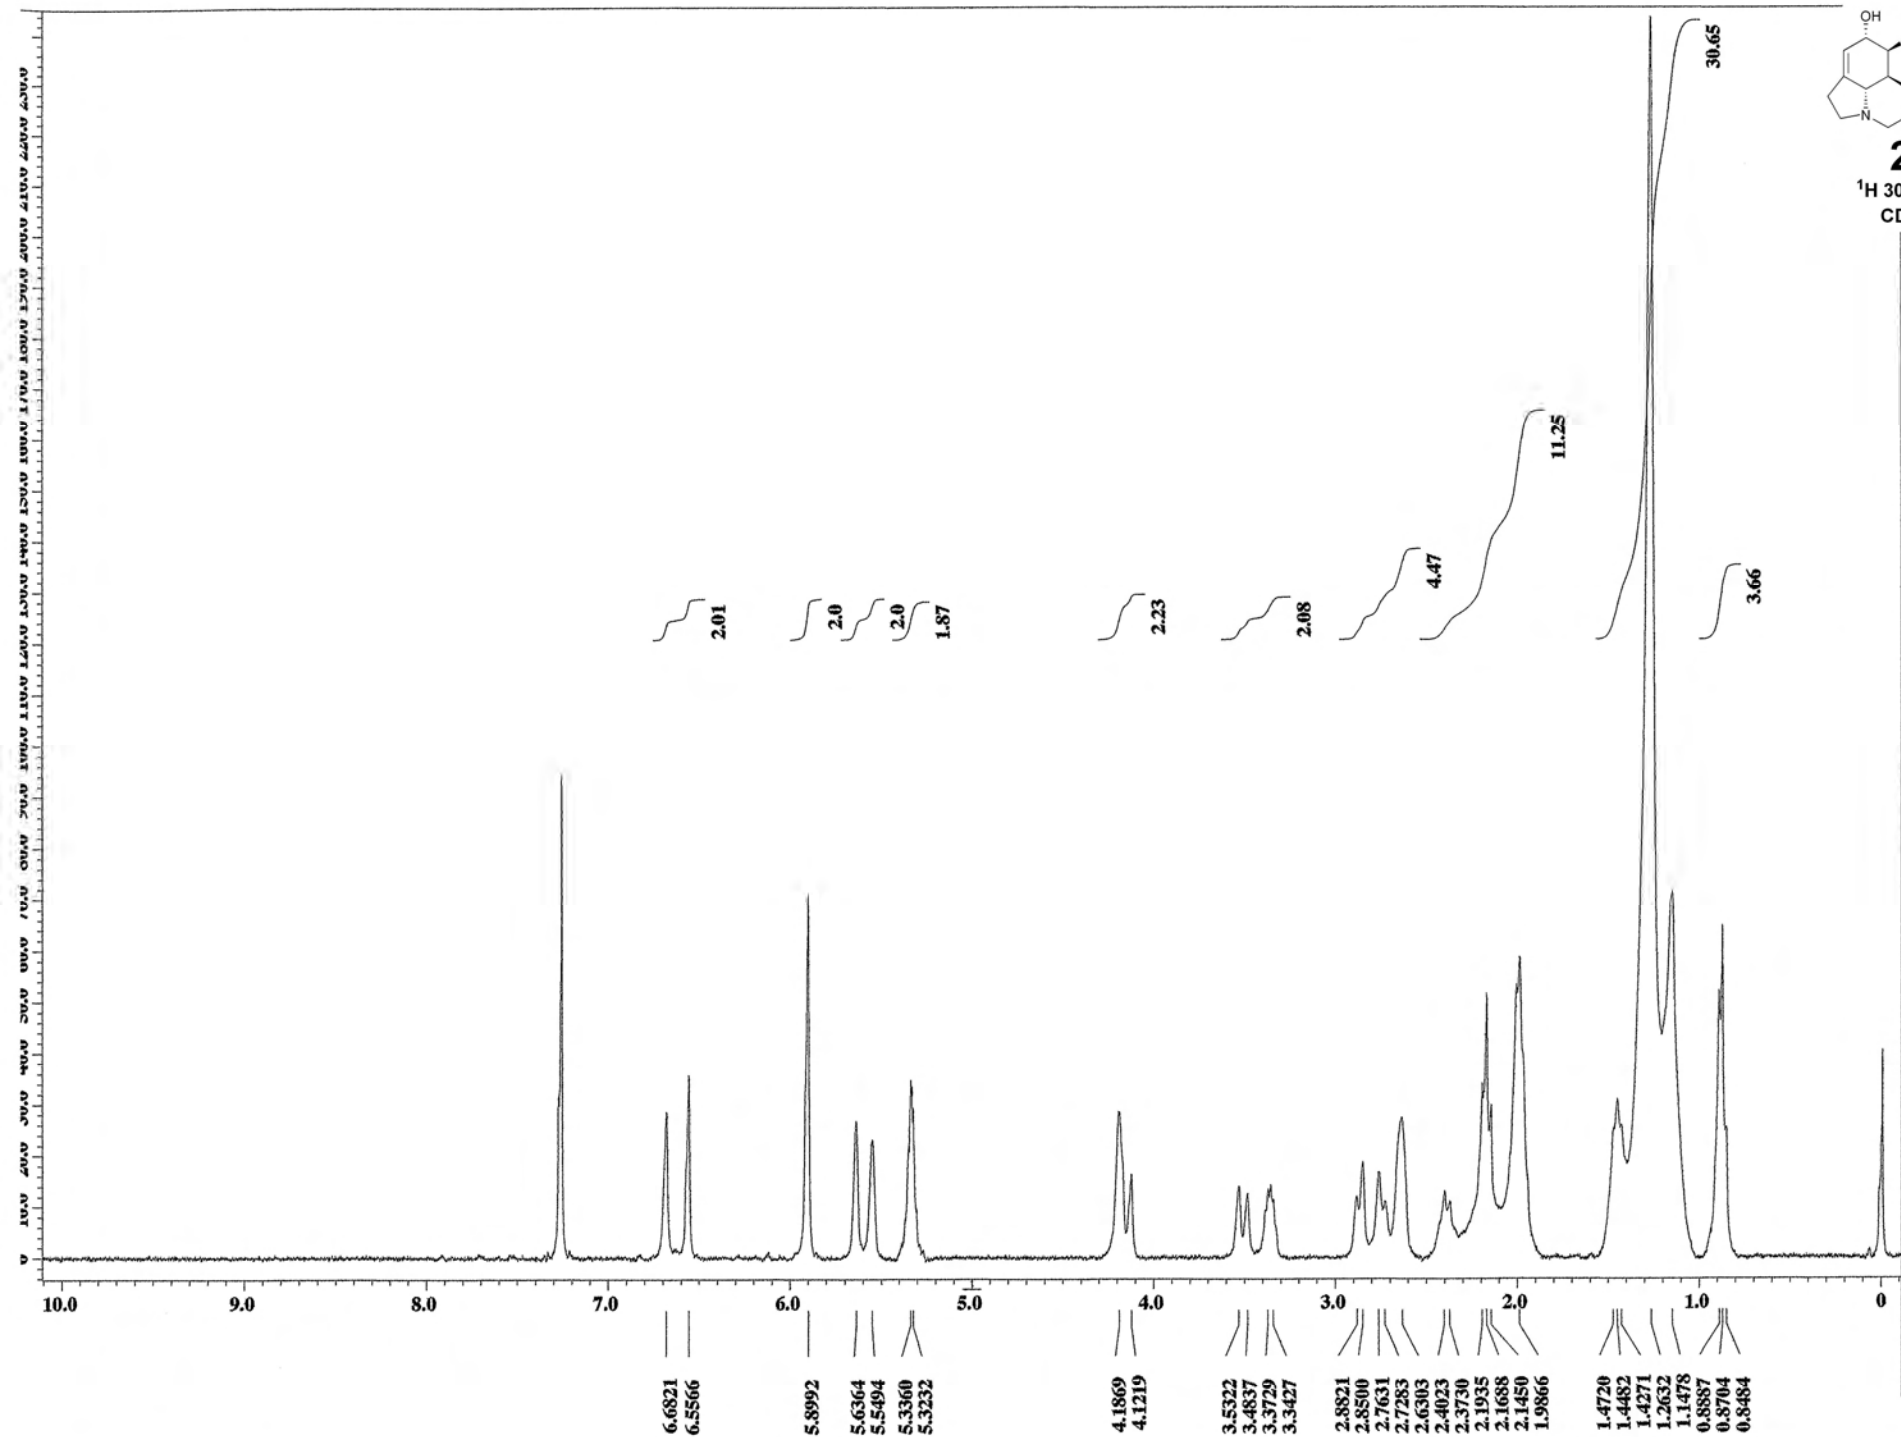

X : parts per Million :  $^1\text{H}$



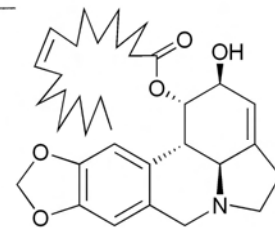

**25**

$^{13}\text{C}$  75 MHz

$\text{CDCl}_3$

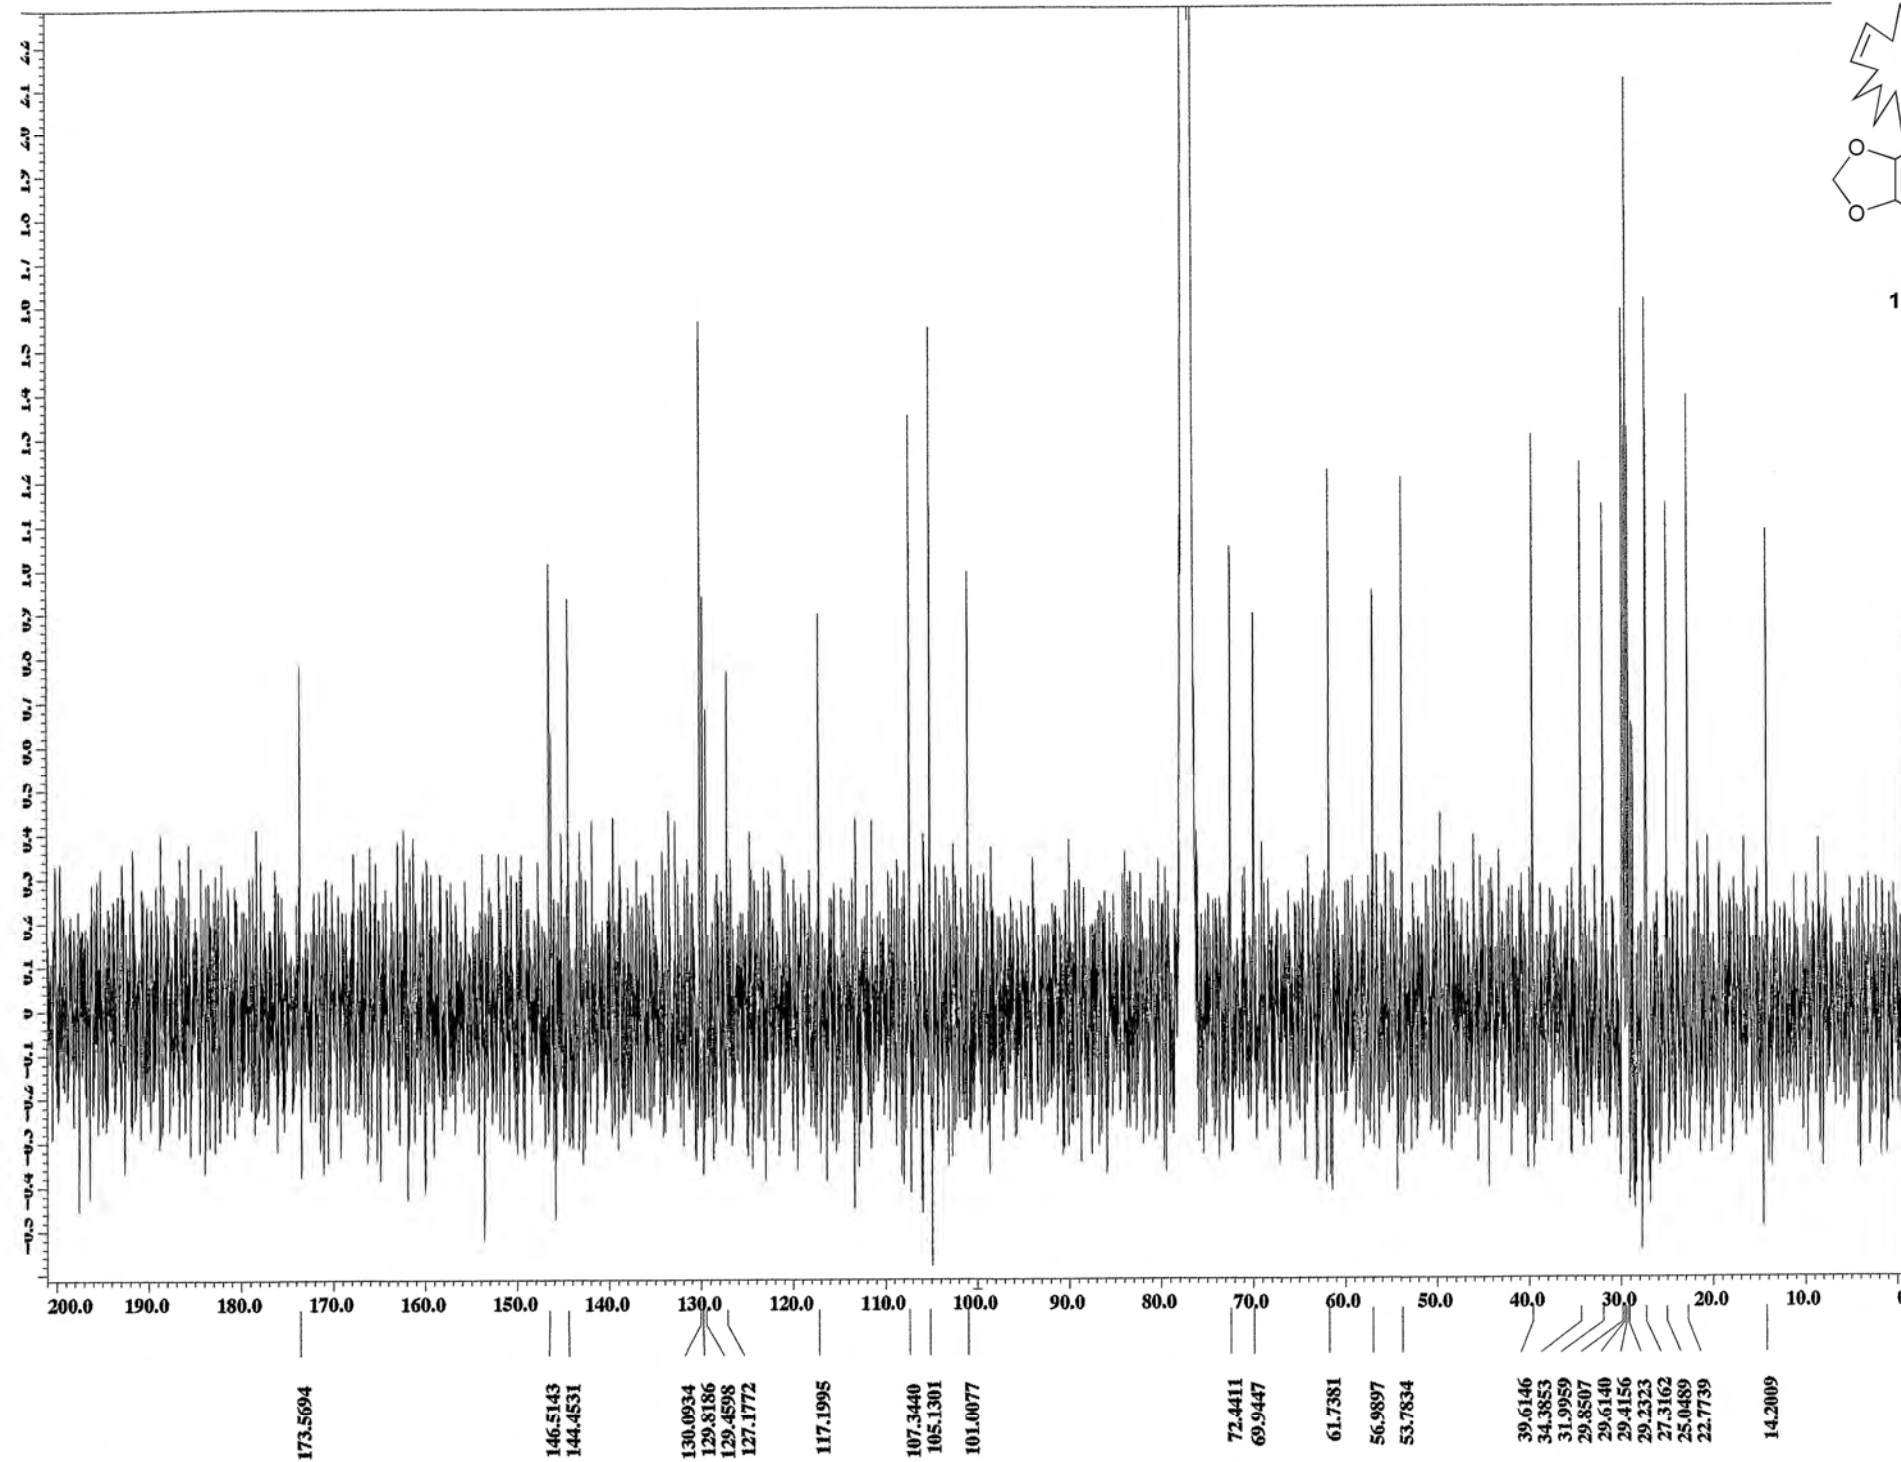

X : parts per Million :  $^{13}\text{C}$

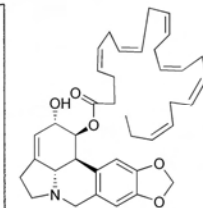

**26**  
<sup>1</sup>H 300 MHz  
CDCl<sub>3</sub>

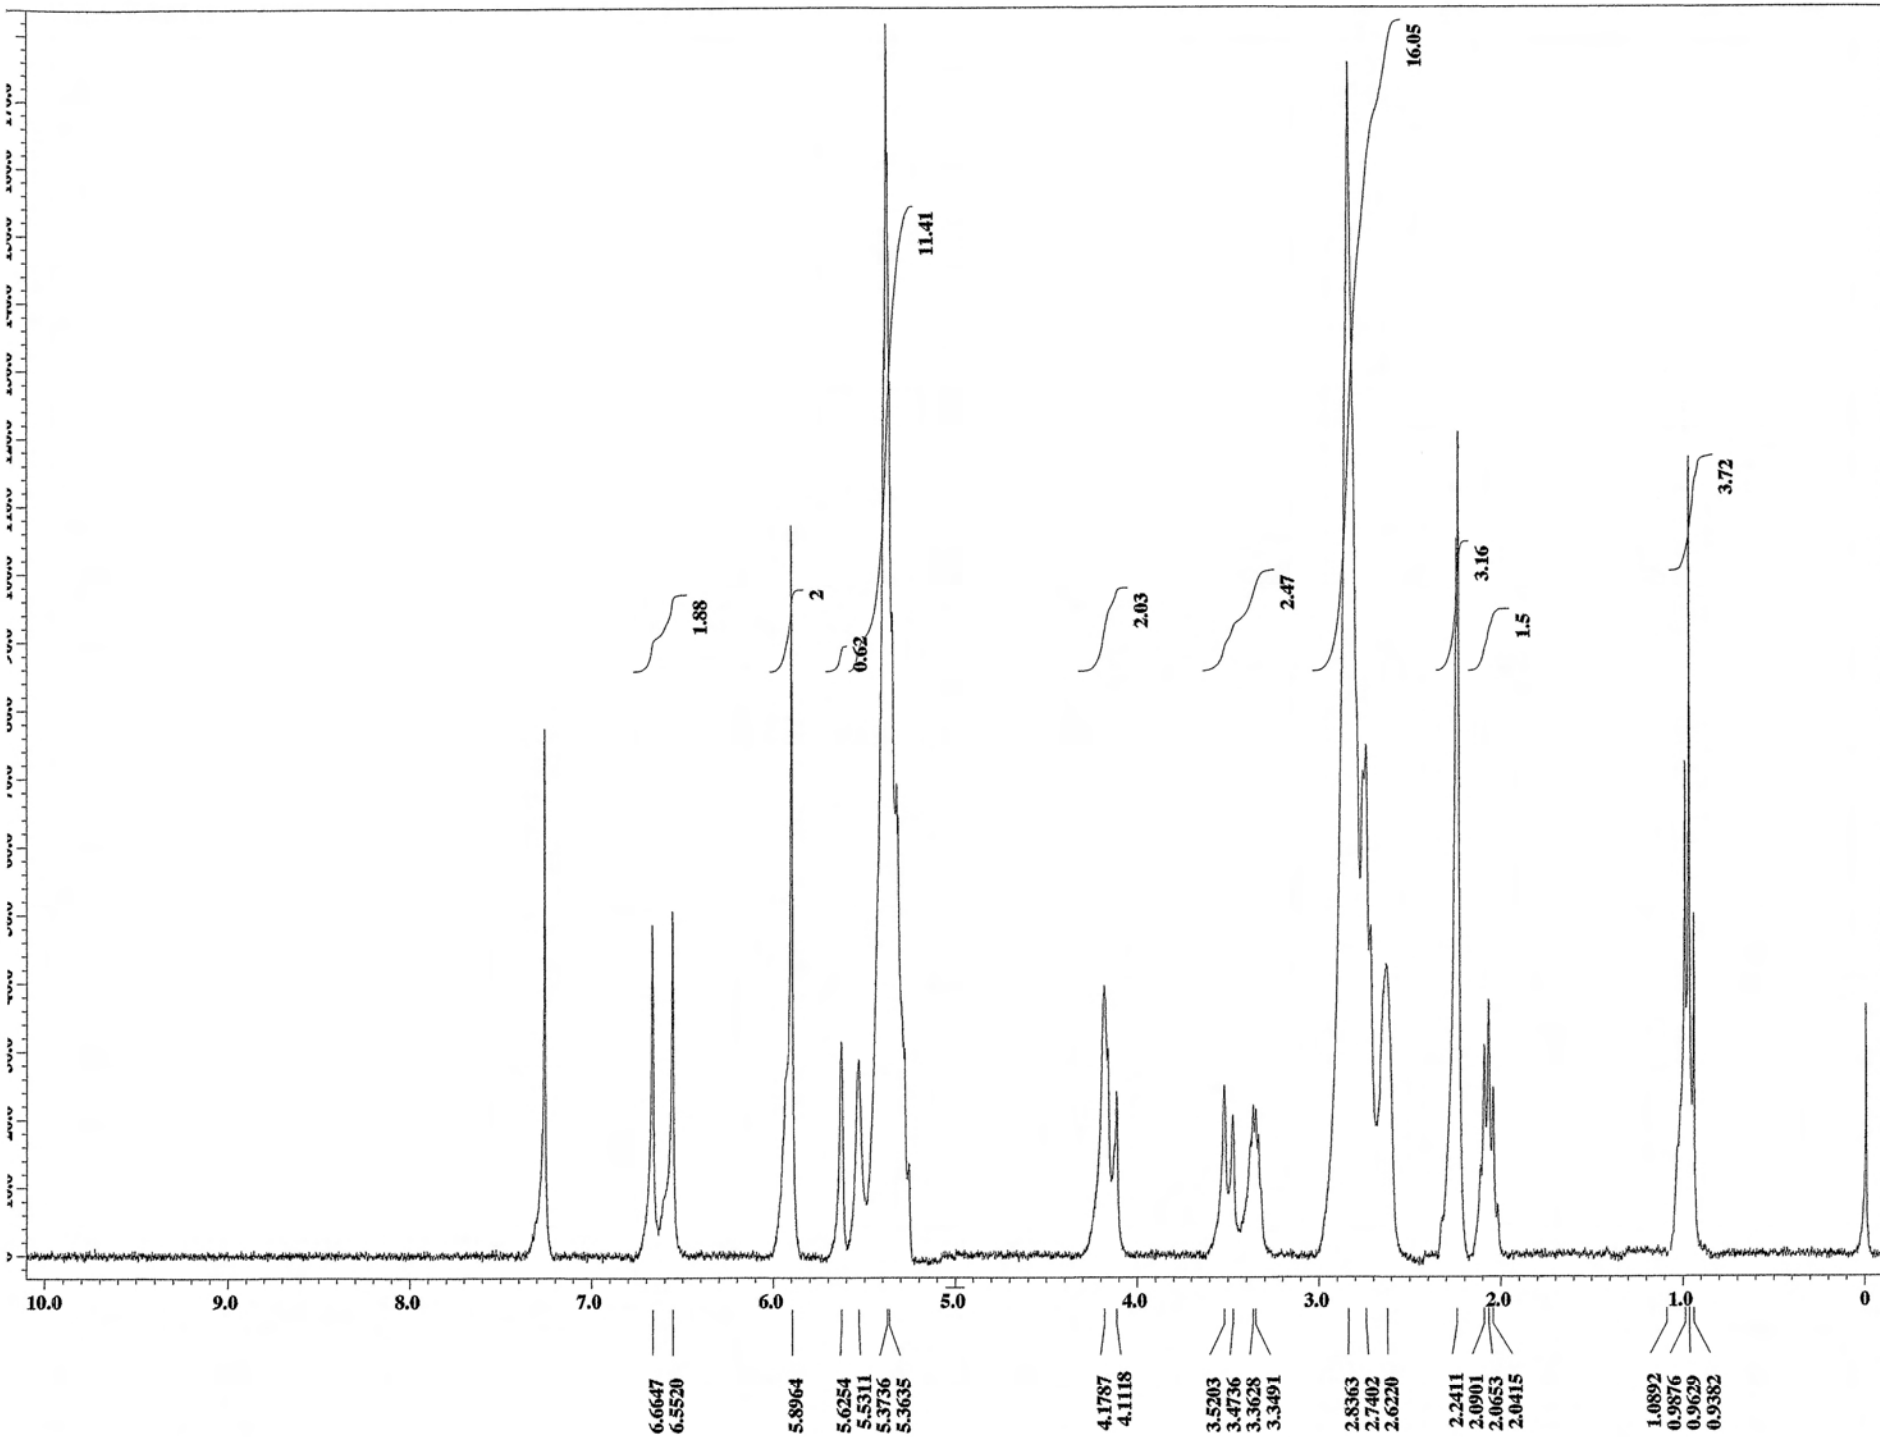

X : parts per Million : 1H

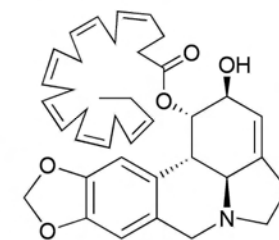

**26**  
<sup>13</sup>C 75 MHz  
CDCl<sub>3</sub>

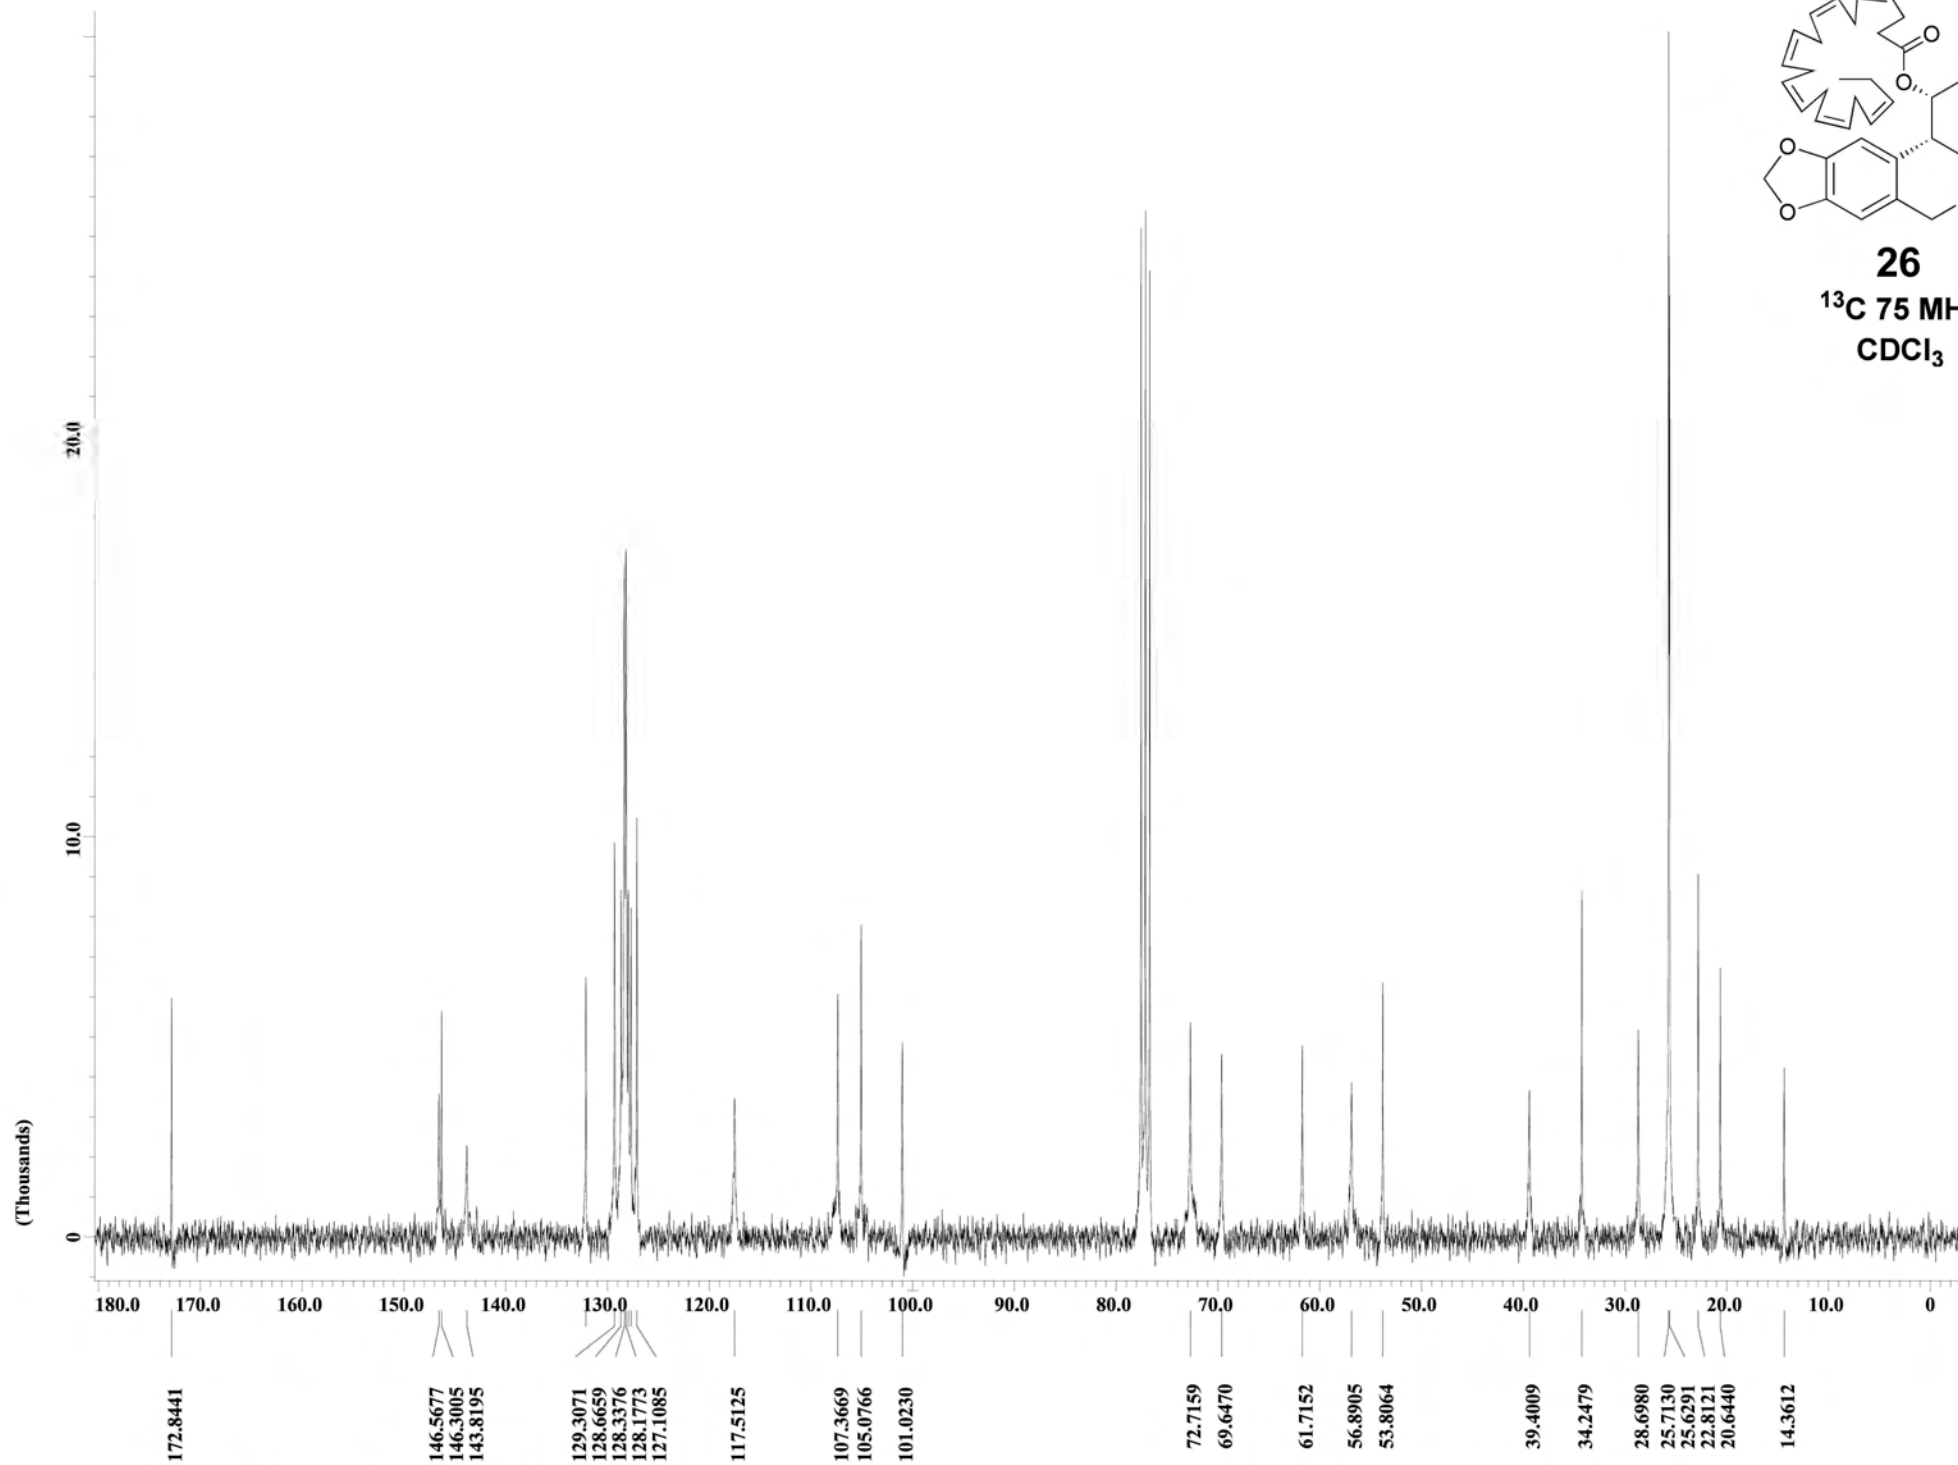

X : parts per Million : 13C

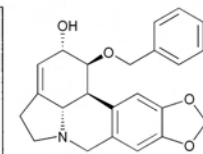

**27**

<sup>1</sup>H 300 MHz  
CDCl<sub>3</sub>

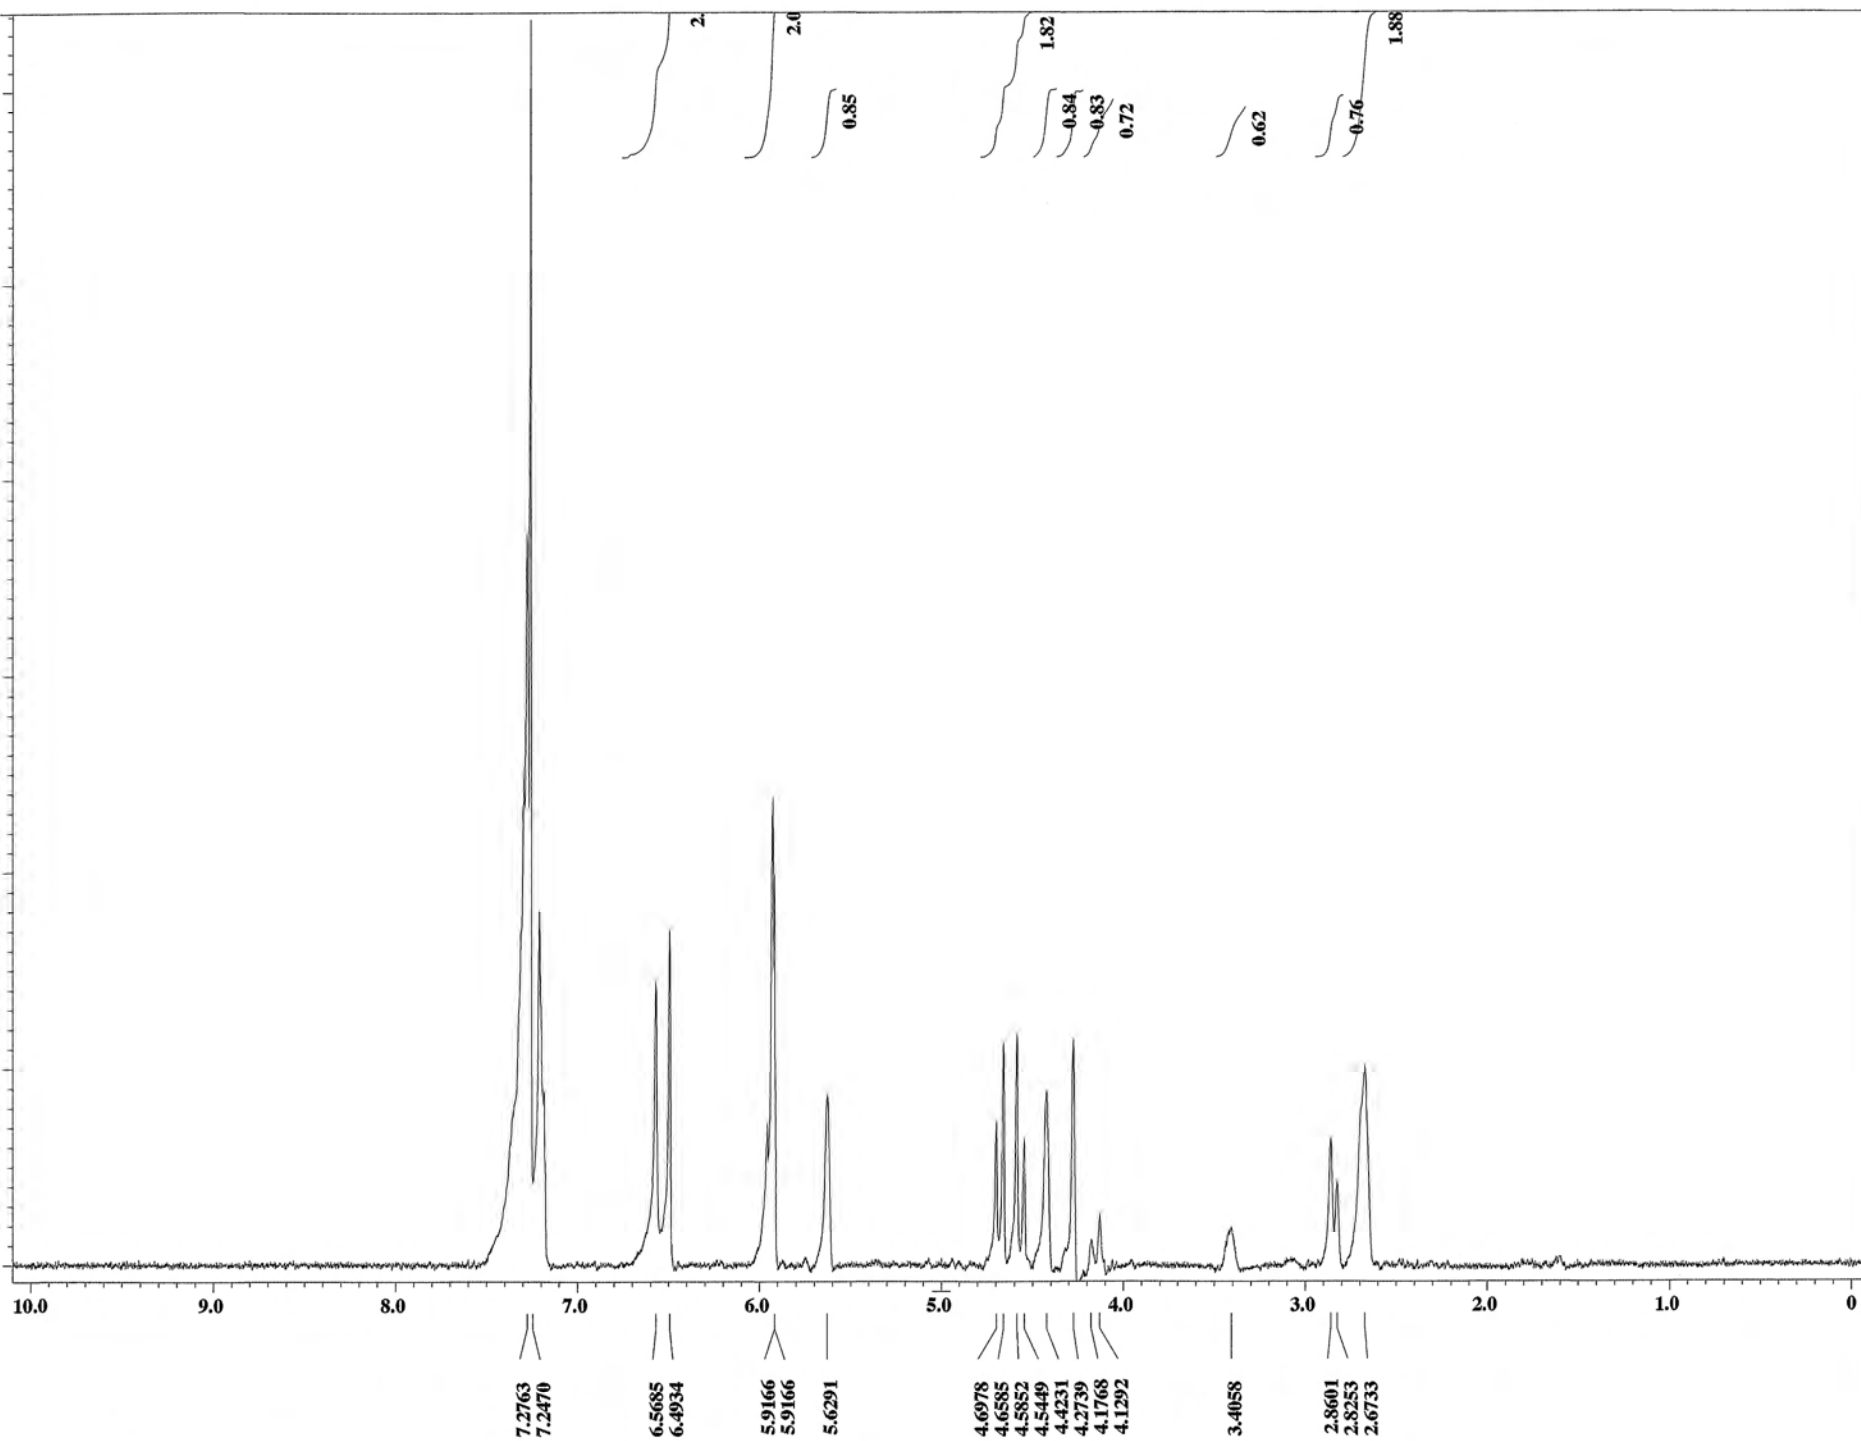

X : parts per Million : 1H

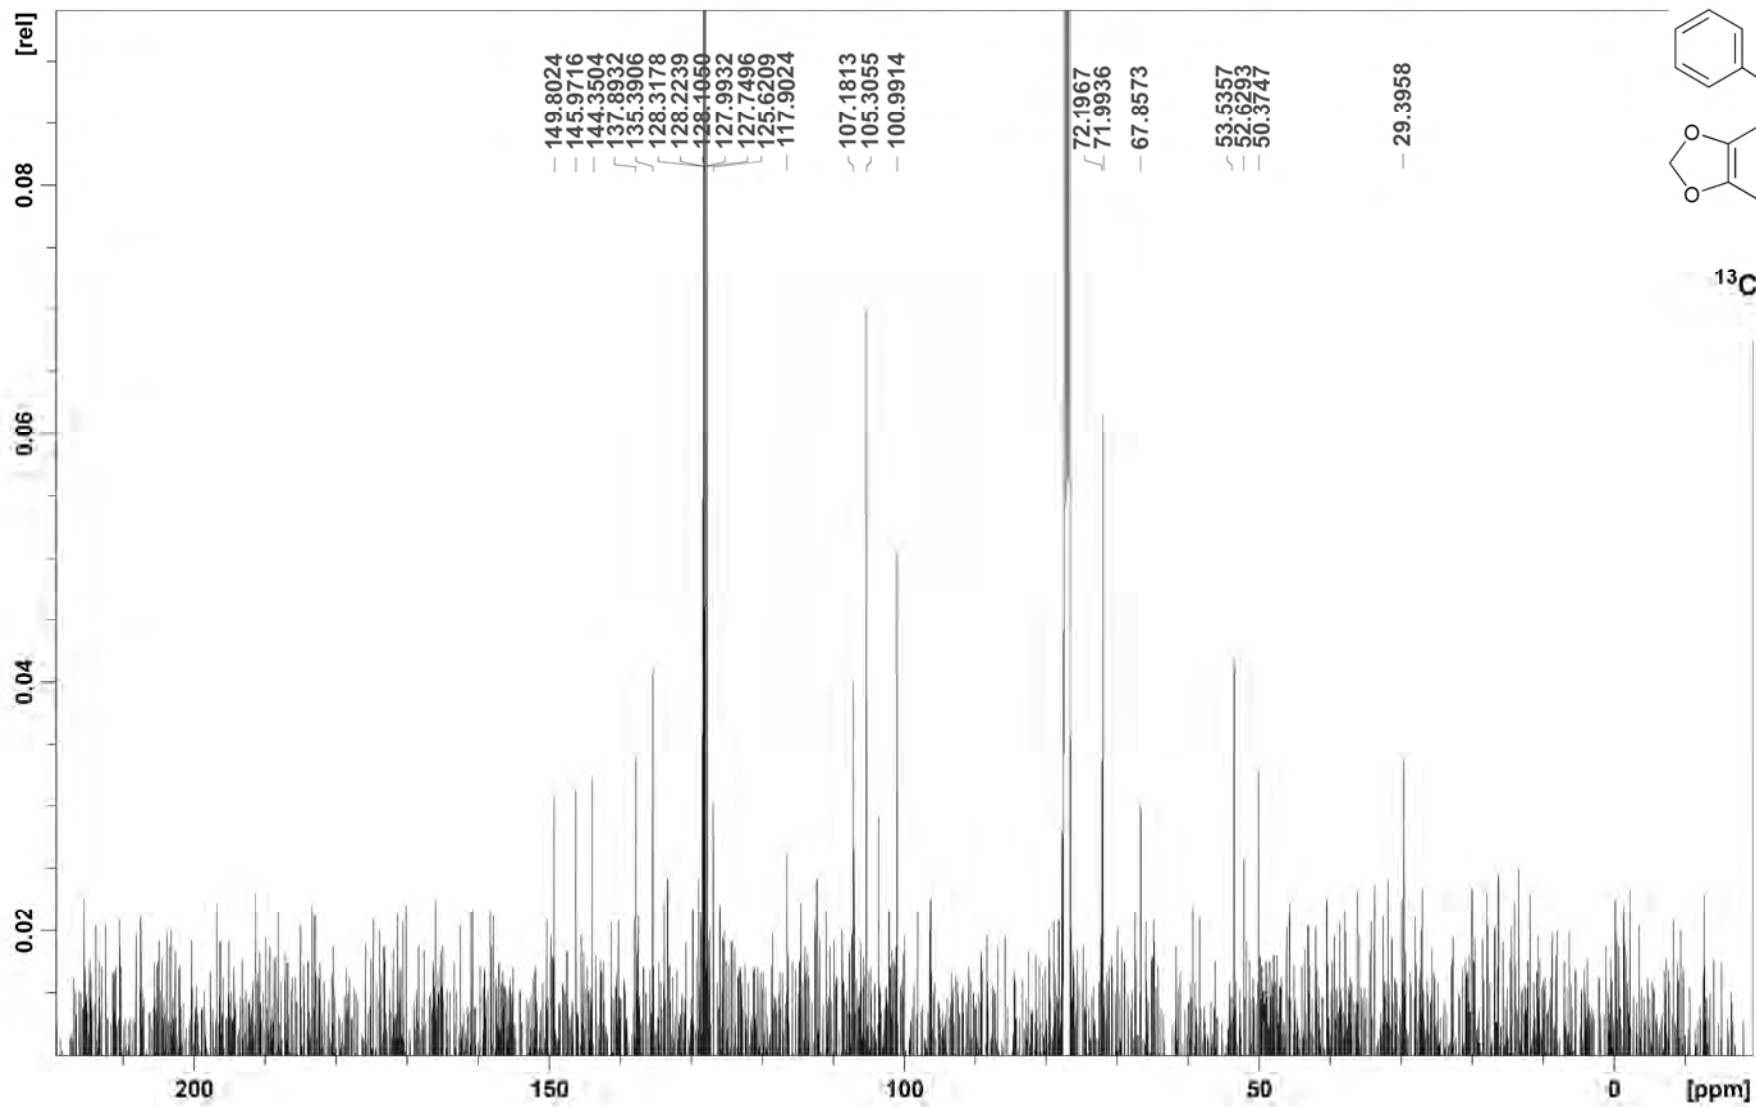

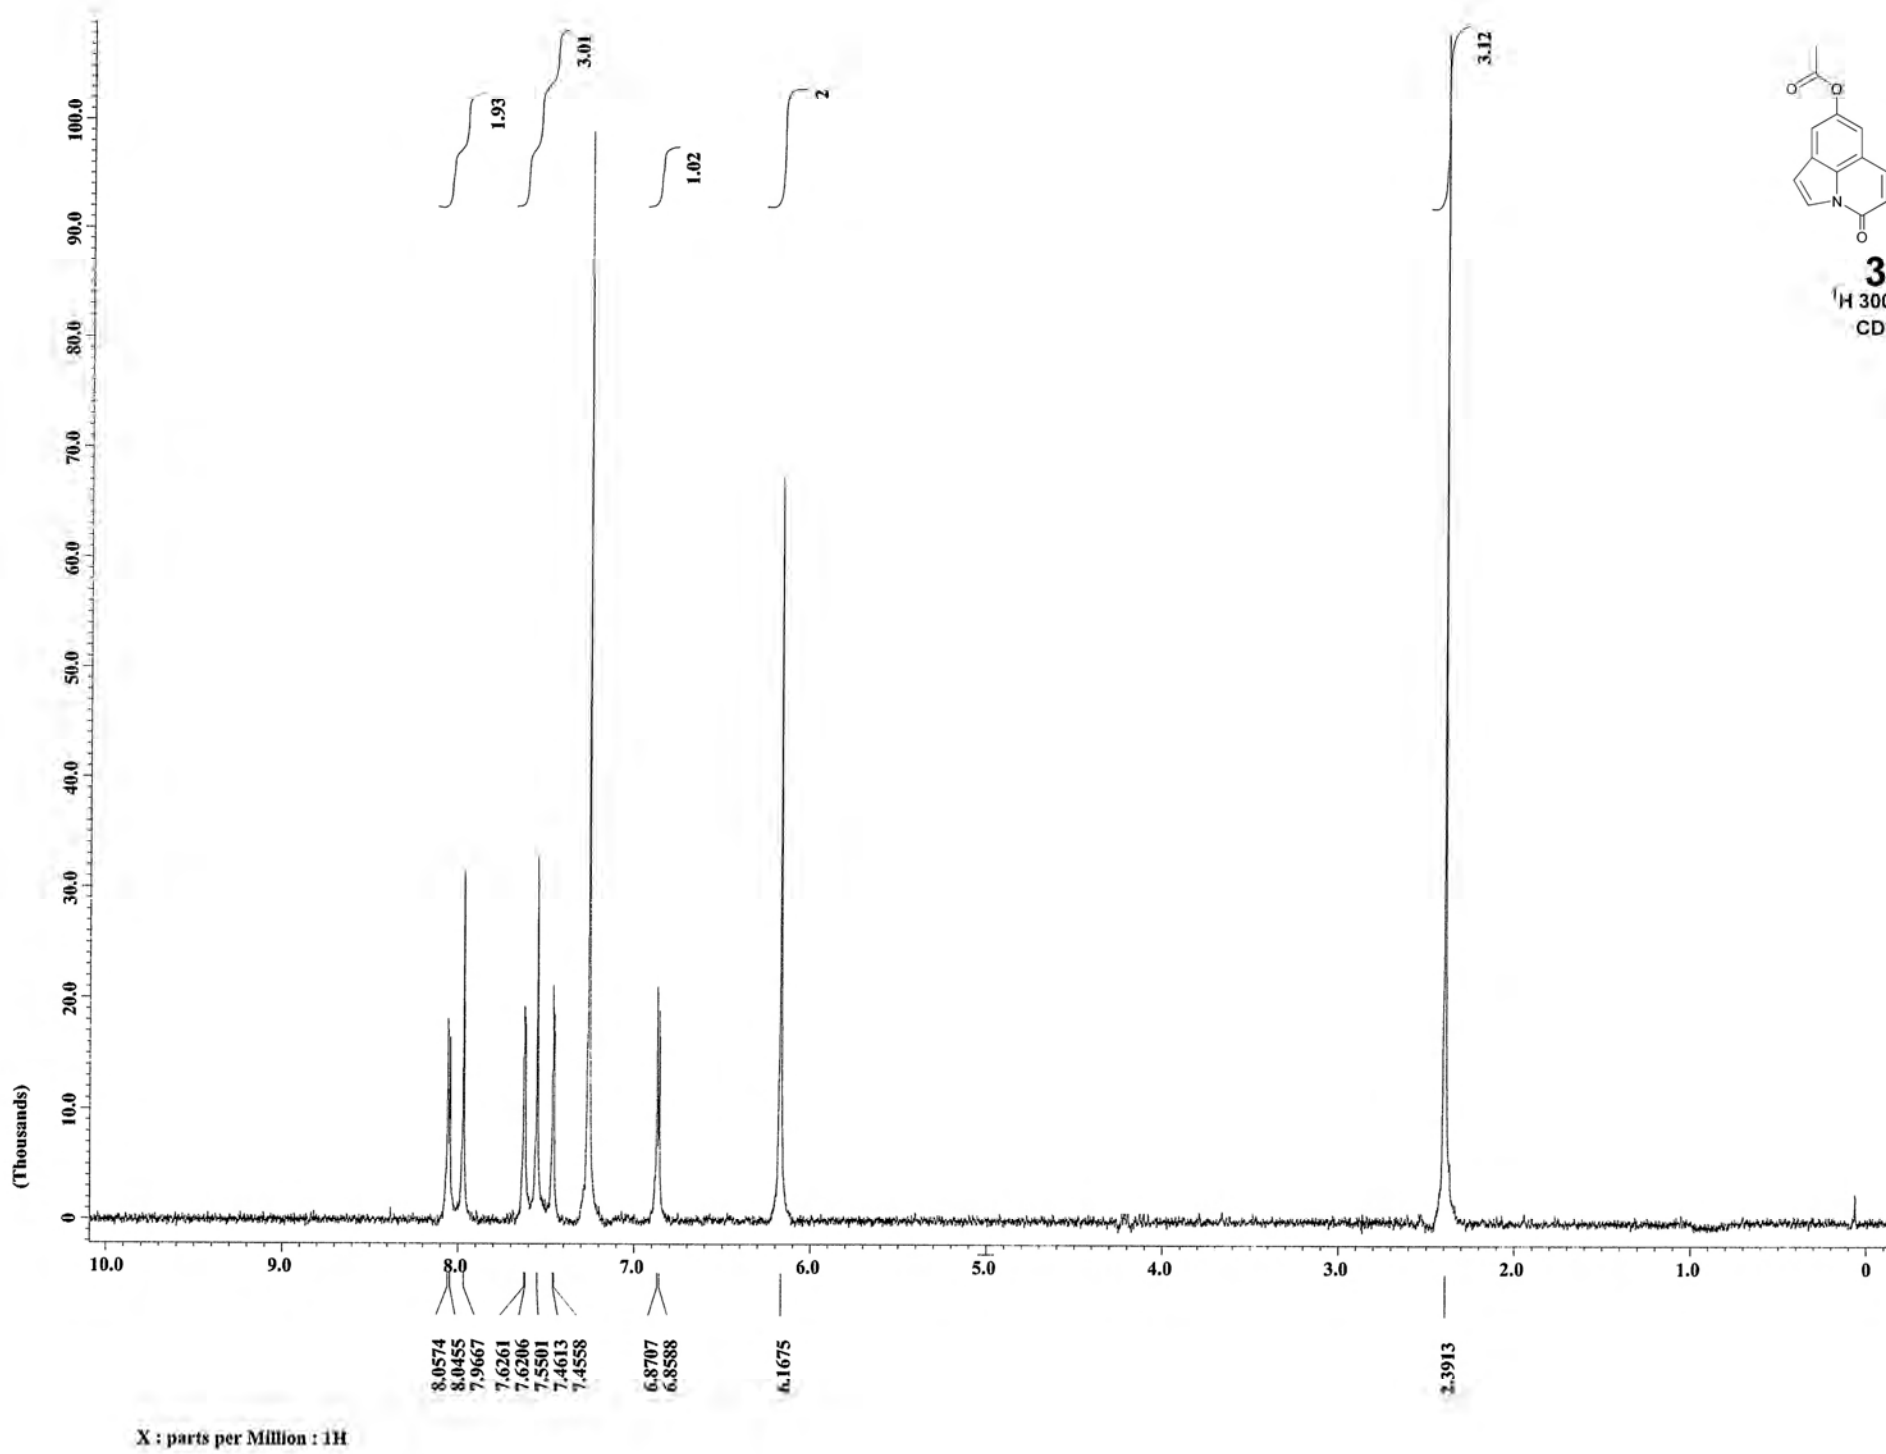

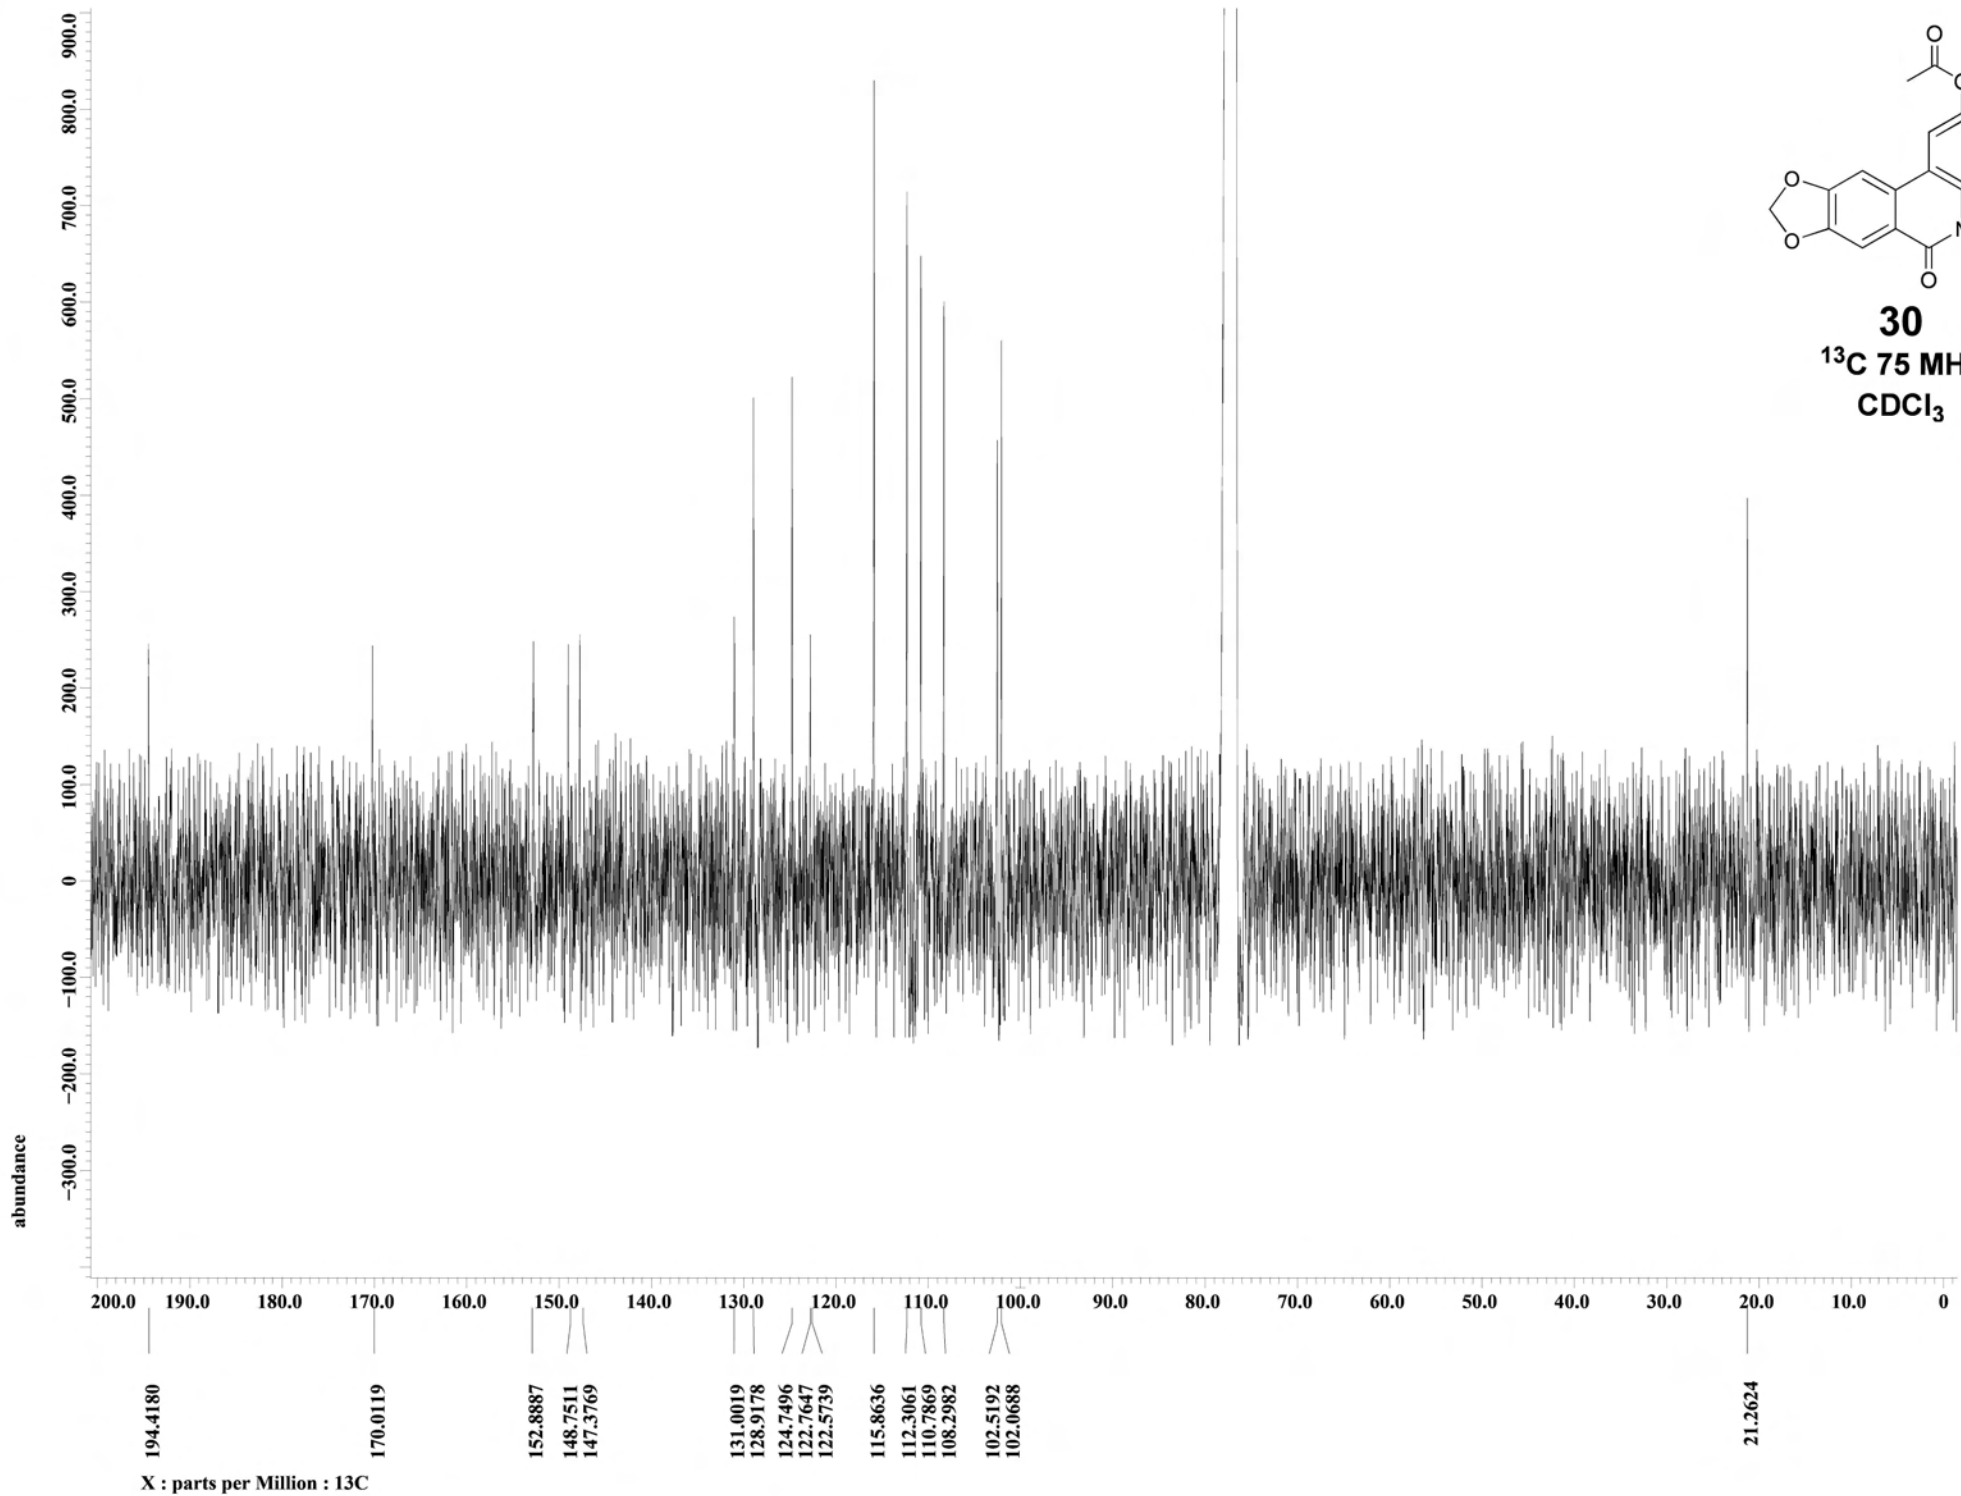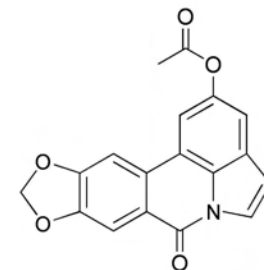

**30**  
<sup>13</sup>C 75 MHz  
CDCl<sub>3</sub>

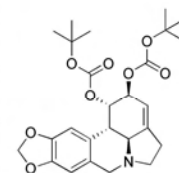

**31**  
<sup>1</sup>H 300 MHz  
CDCl<sub>3</sub>

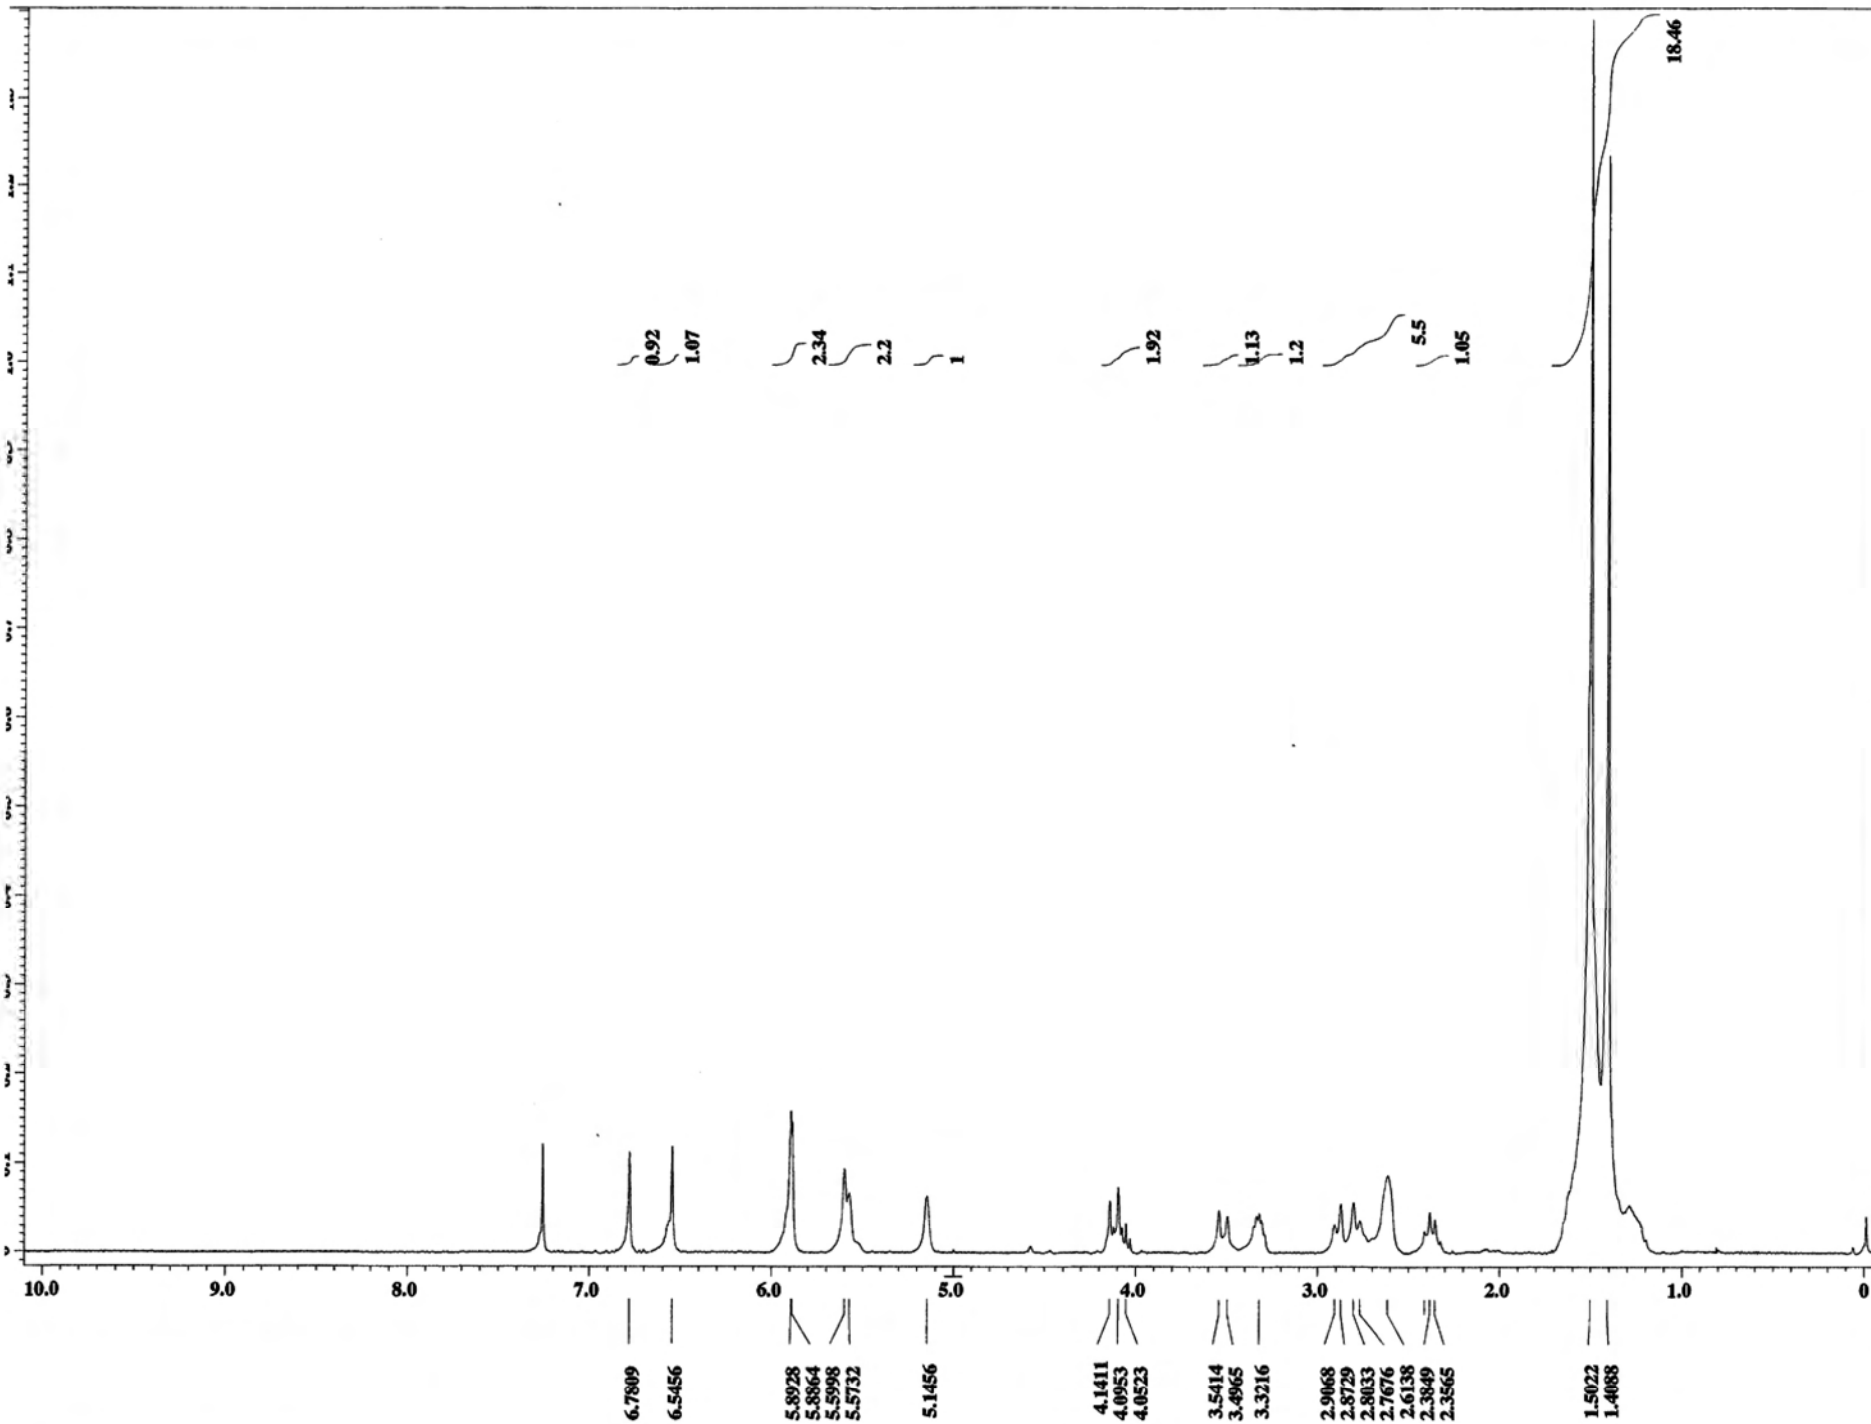

X : parts per Million : 1H



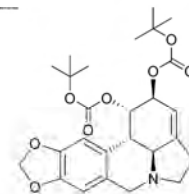

**31**

<sup>13</sup>C 75 MHz  
CDCl<sub>3</sub>

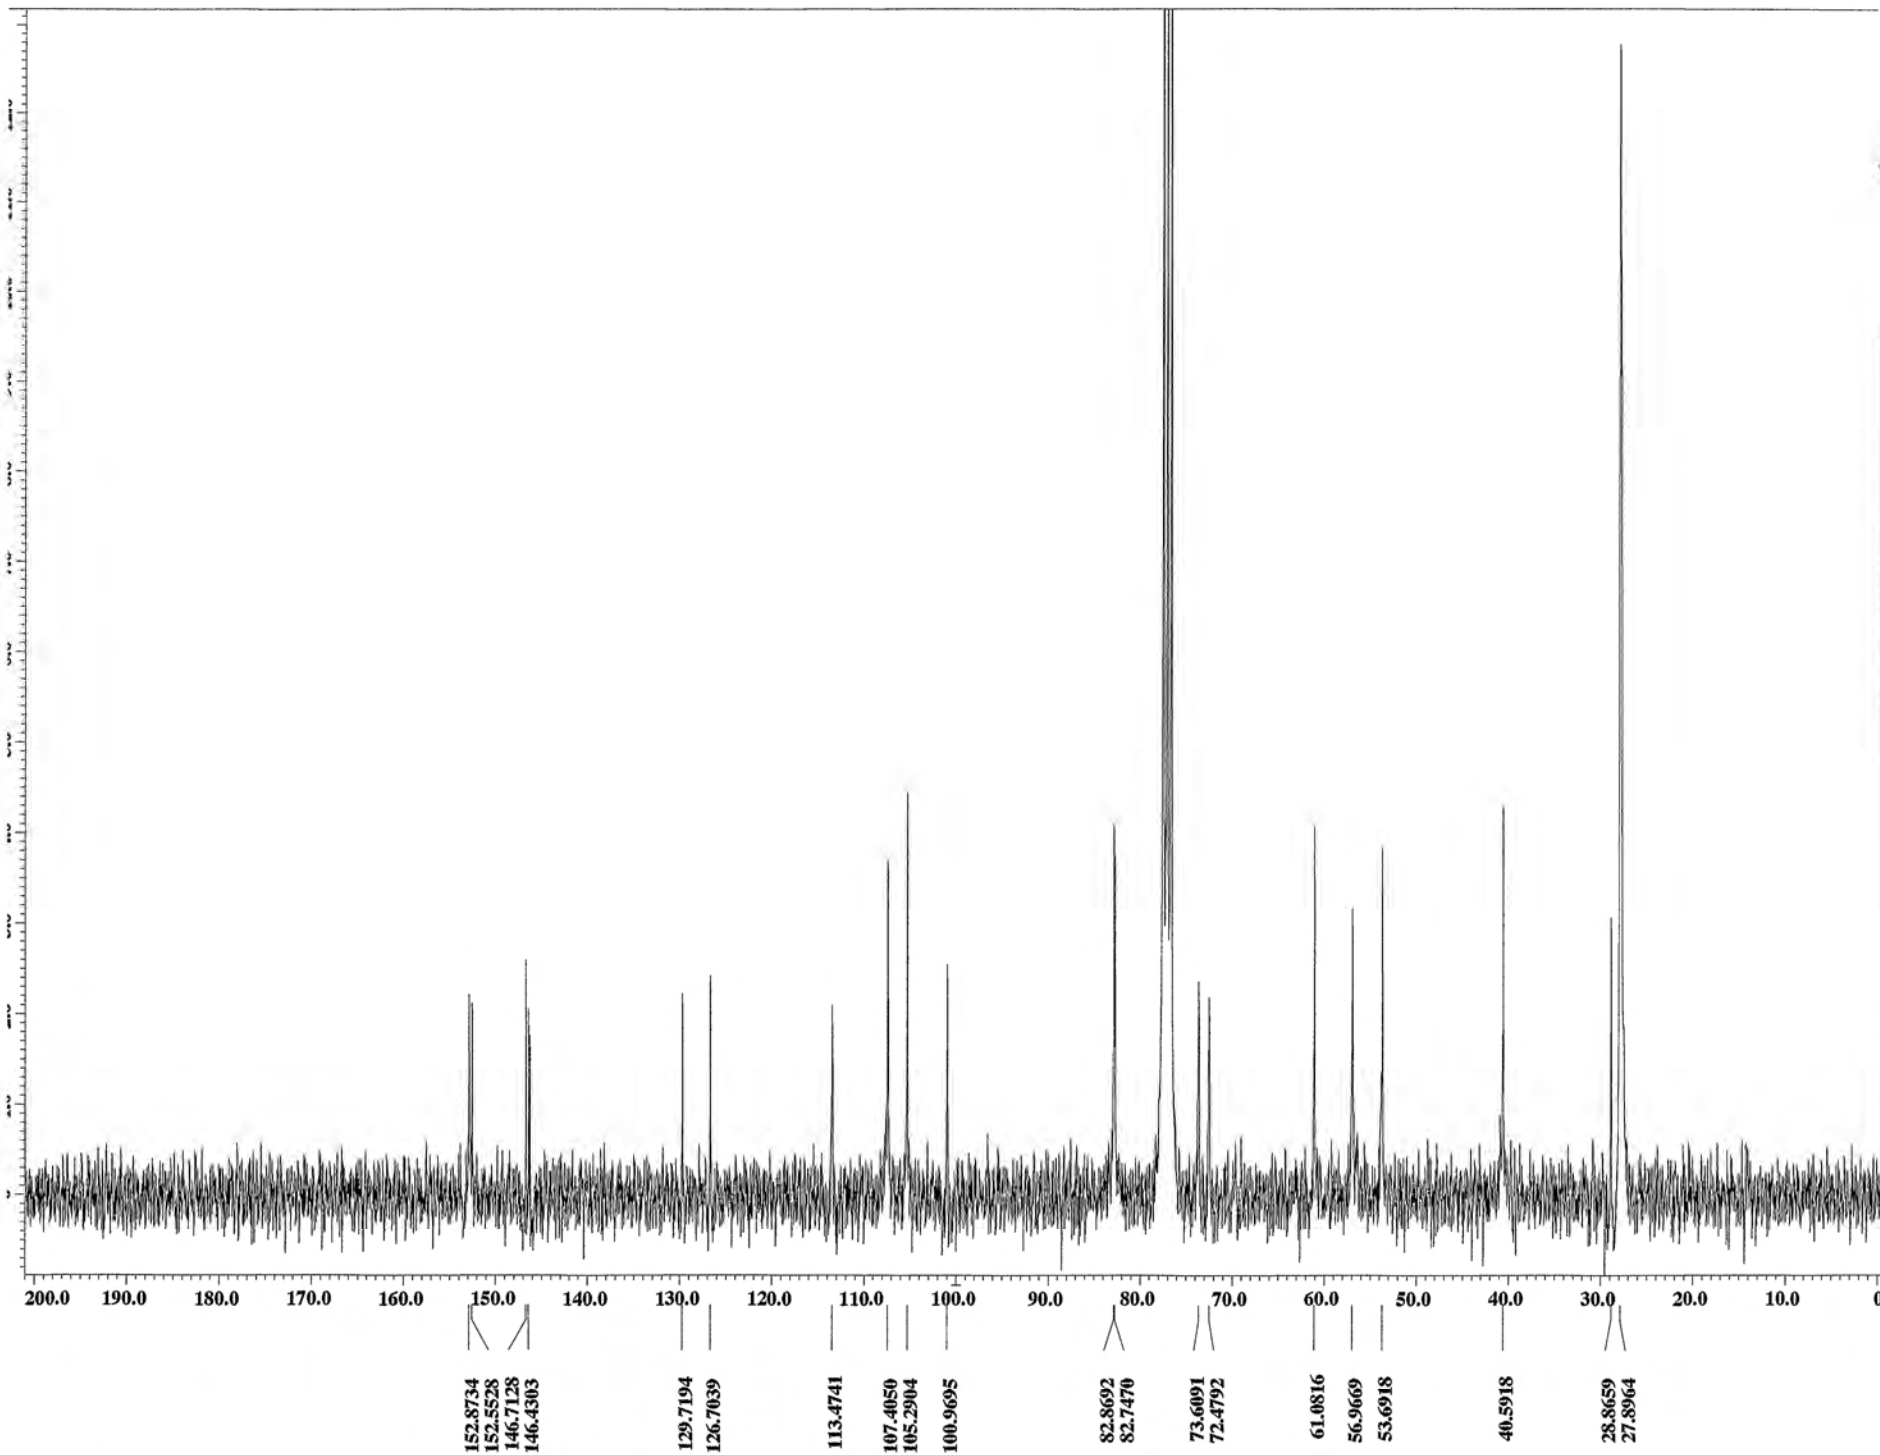

X : parts per Million : <sup>13</sup>C

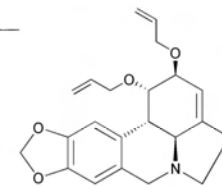

**32**  
<sup>1</sup>H 300 MHz  
CDCl<sub>3</sub>

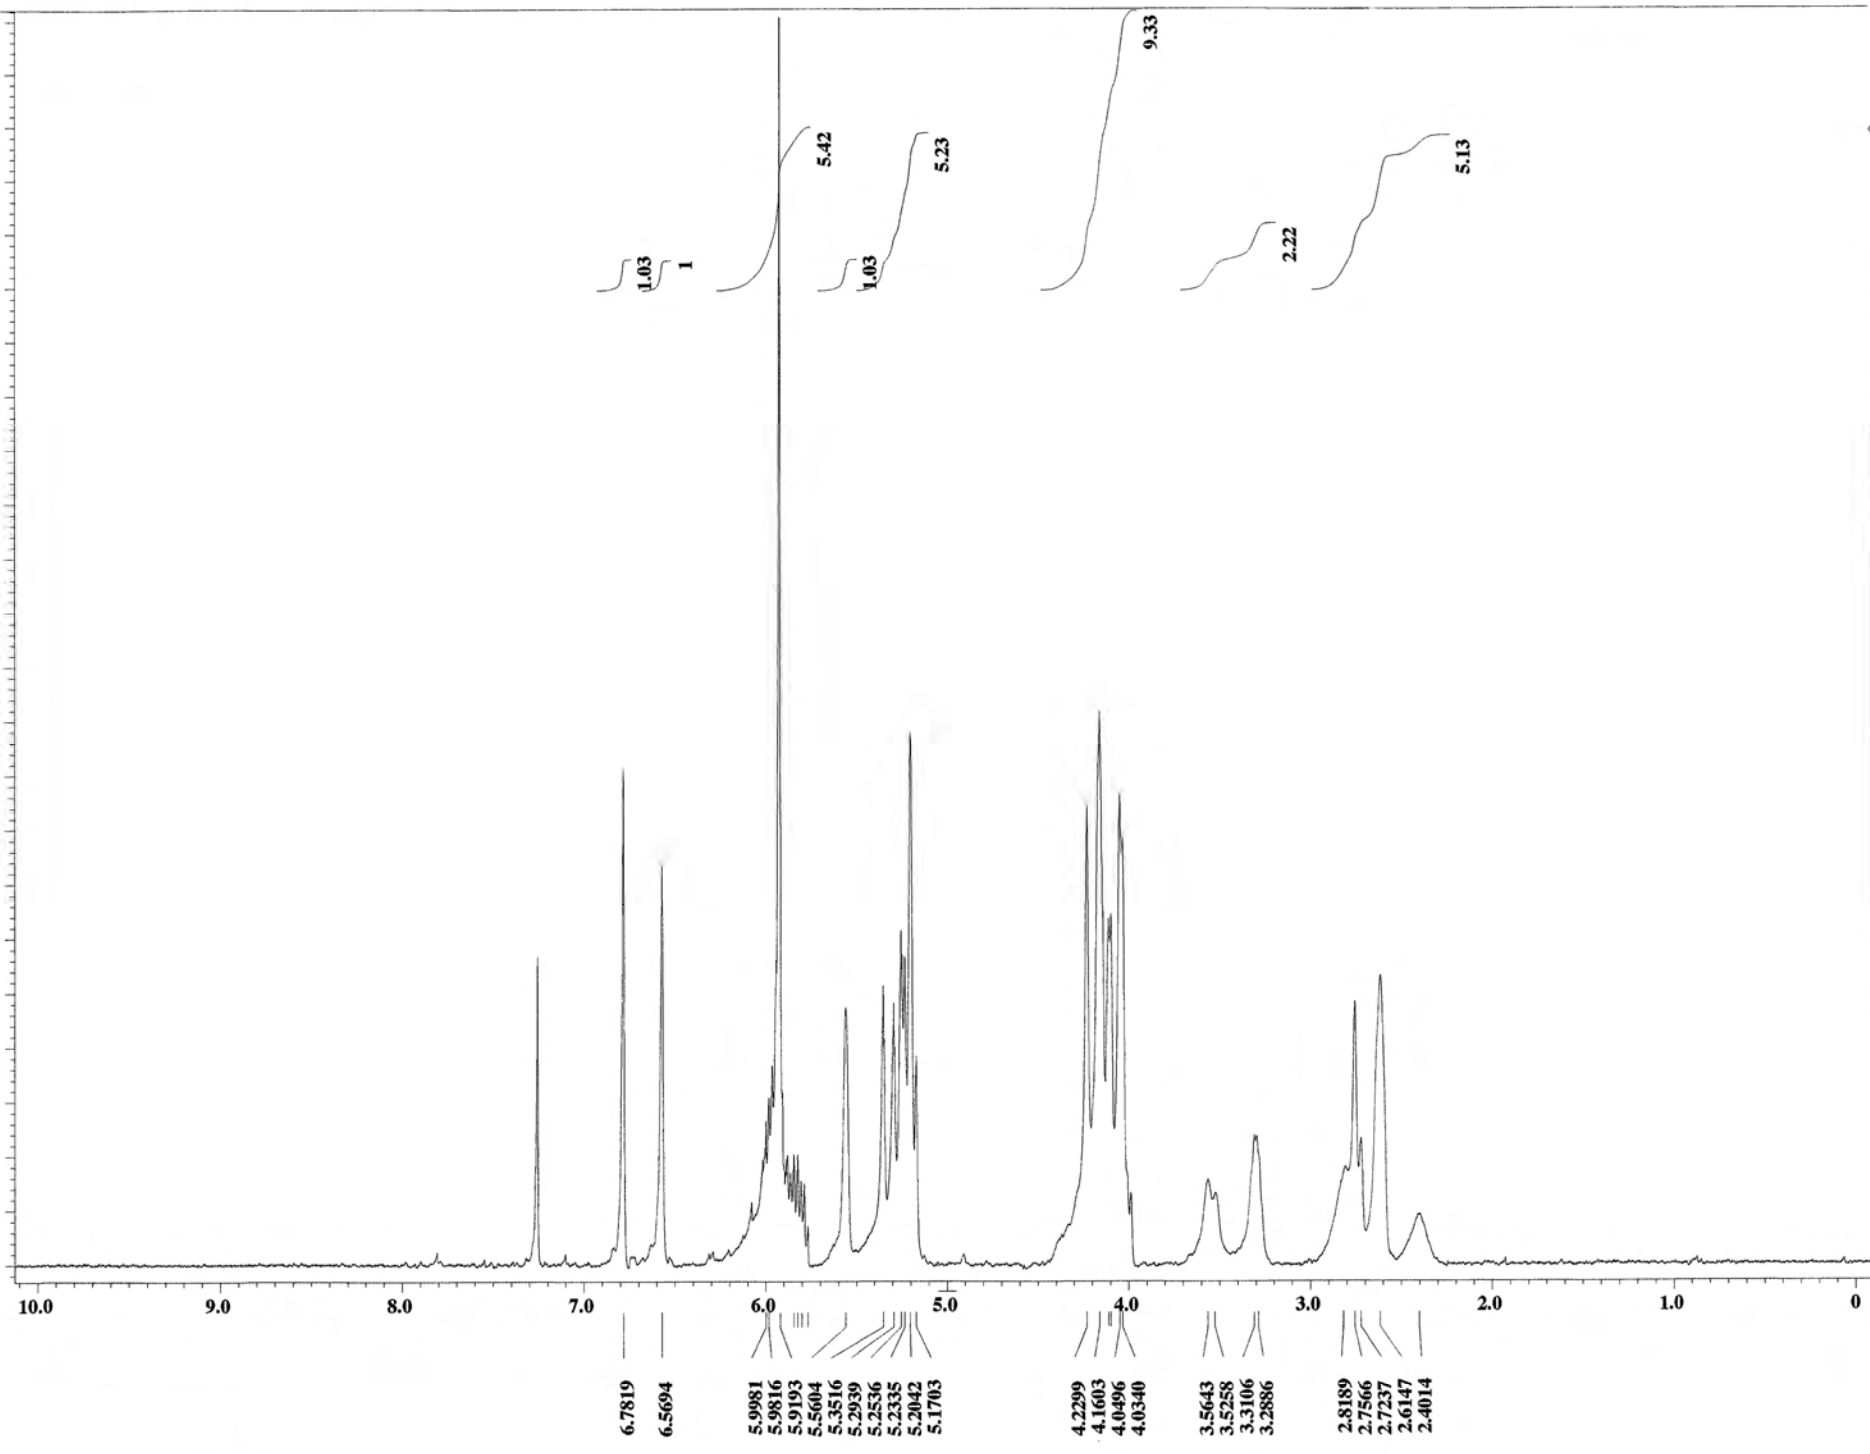

X : parts per Million : 1H

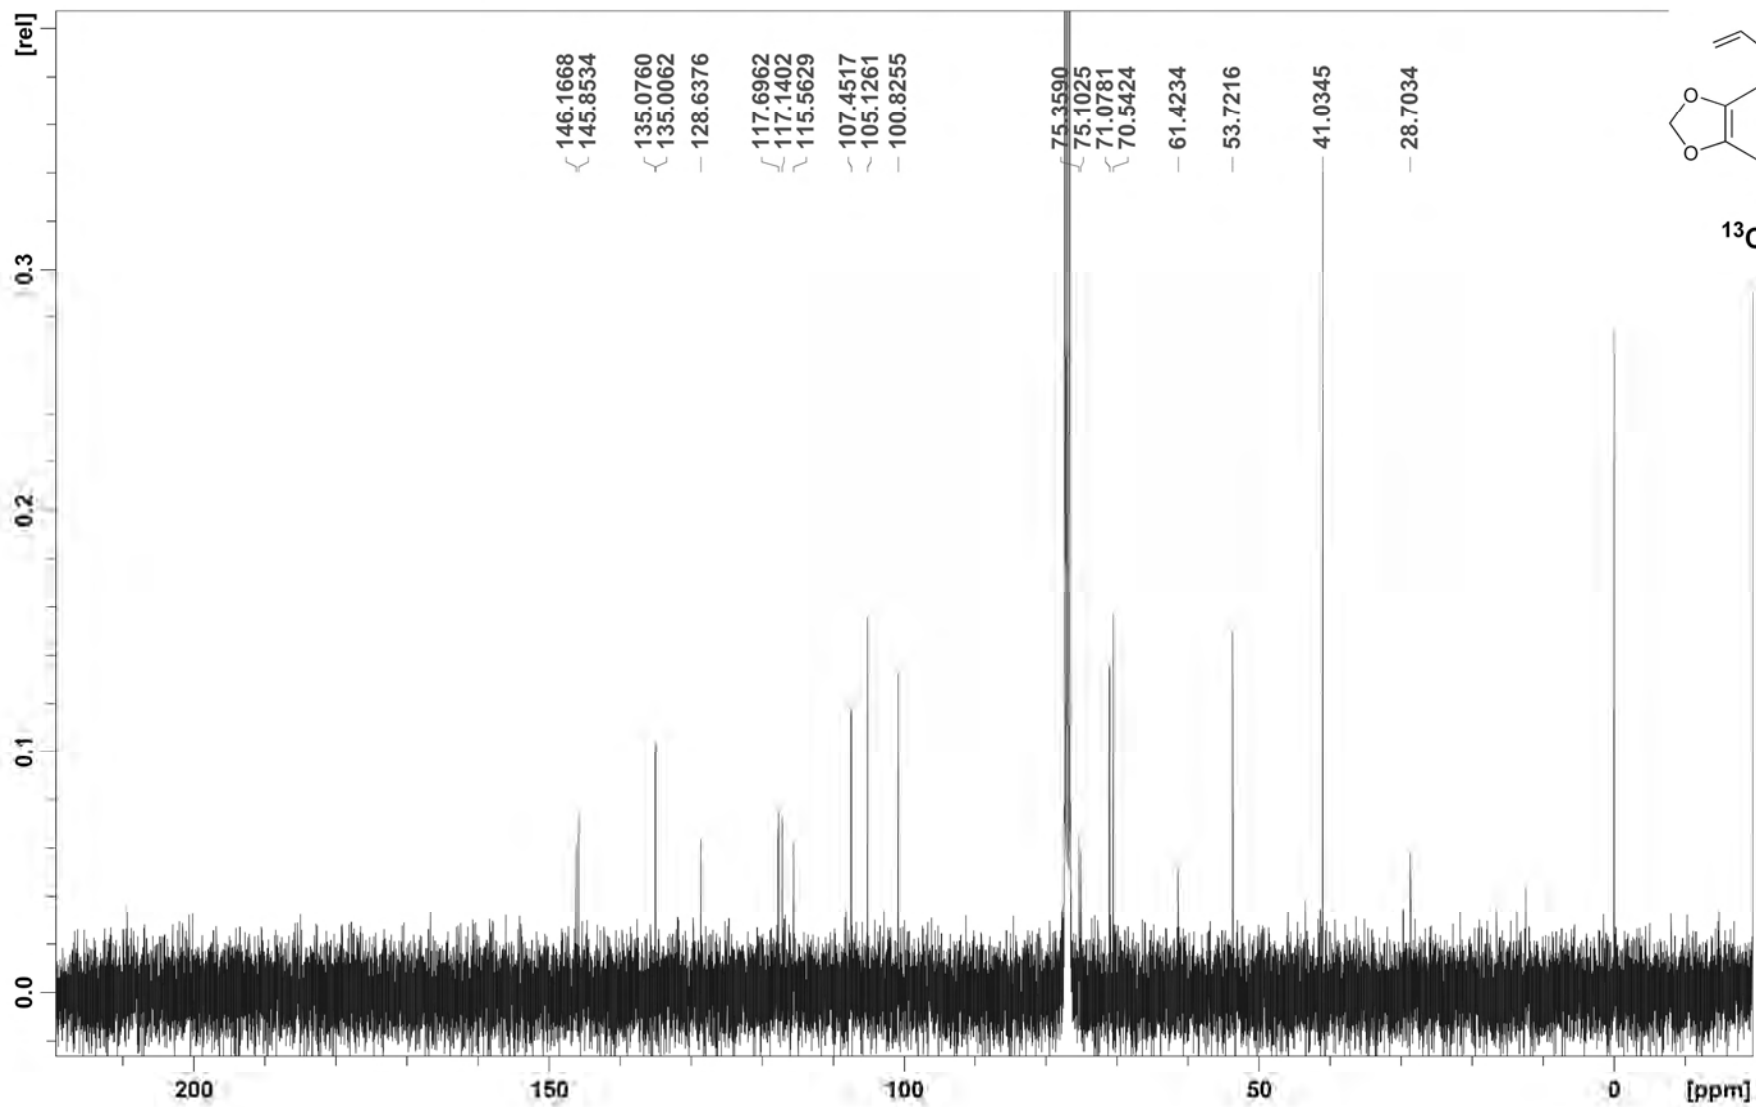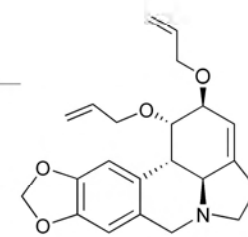

**32**  
<sup>13</sup>C 100 MHz  
CDCl<sub>3</sub>

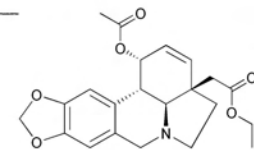

**34**  
<sup>1</sup>H 300 MHz  
CDCl<sub>3</sub>

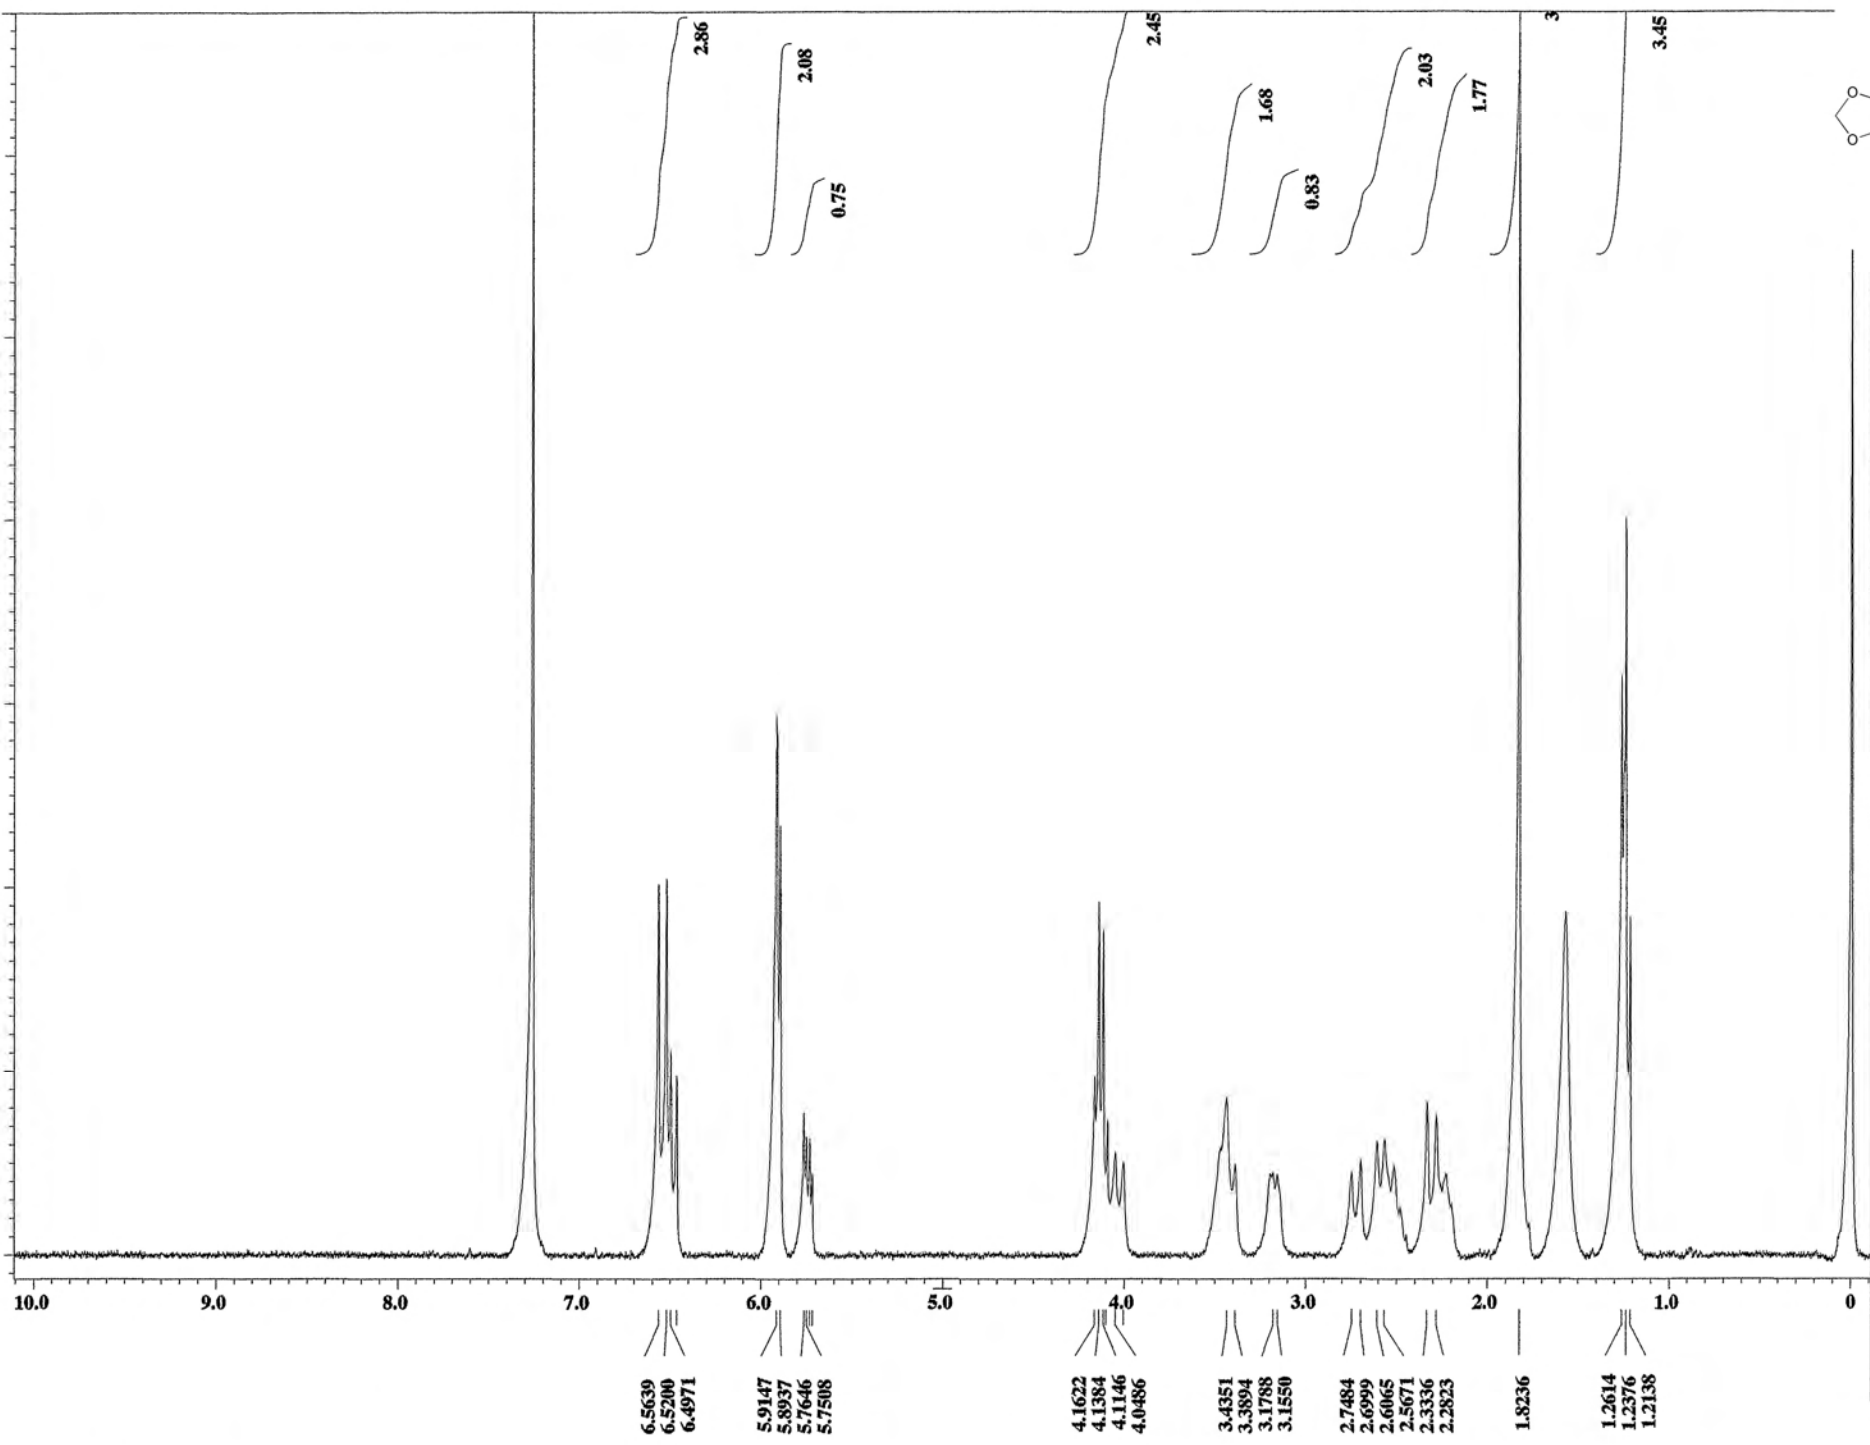

X : parts per Million : 1H

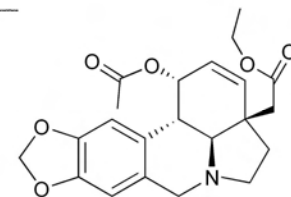

**34**

<sup>13</sup>C 75 MHz  
CDCl<sub>3</sub>

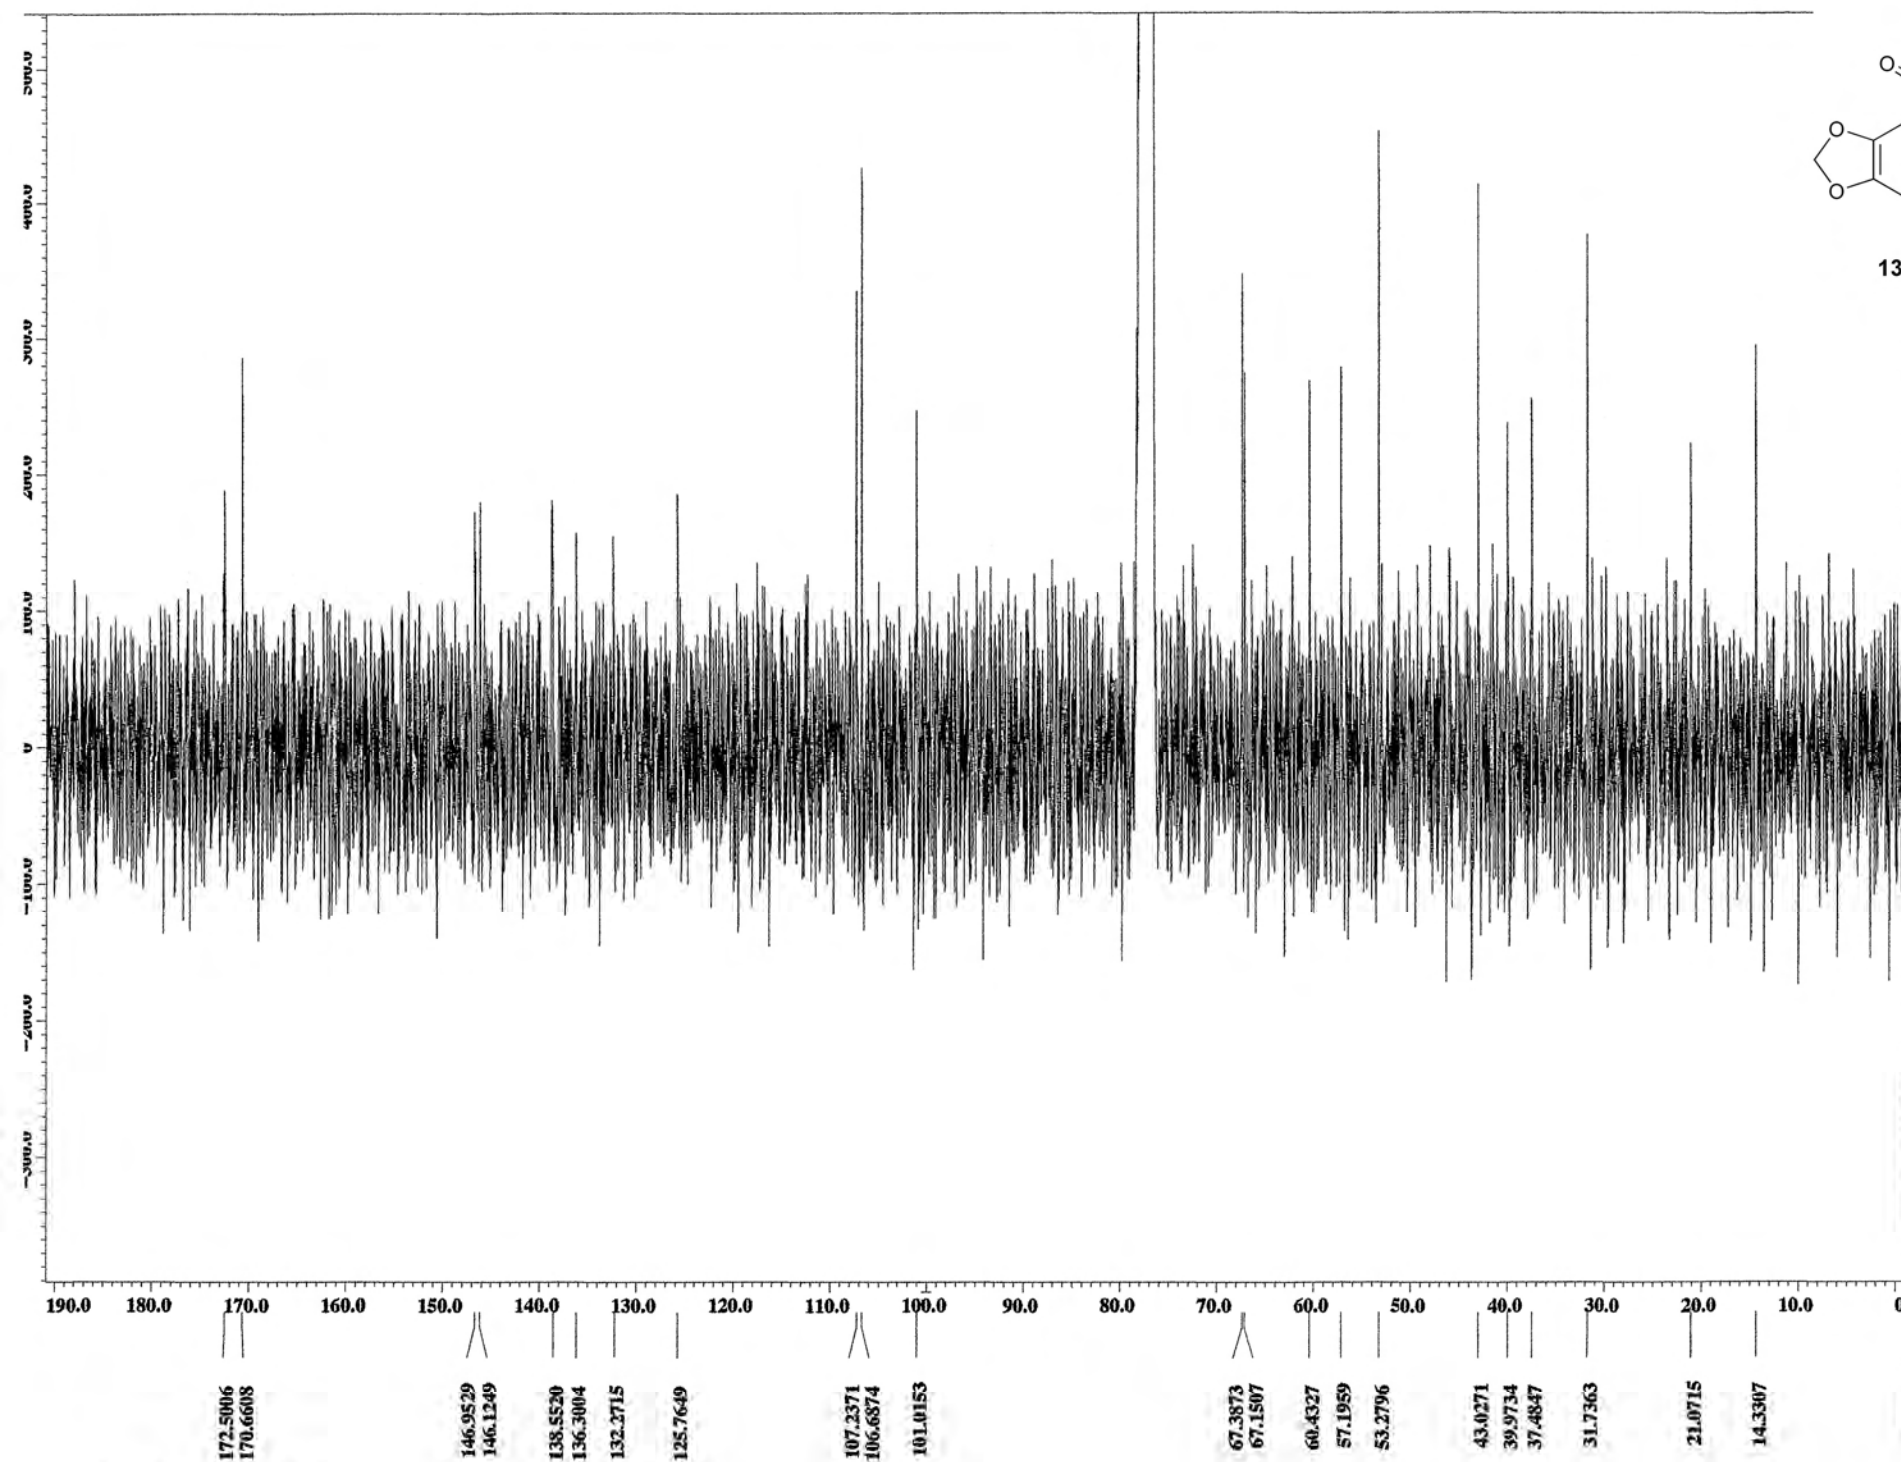

X : parts per Million : <sup>13</sup>C
